# Supplementary material for: Substrate-controlled switchable asymmetric annulations to access polyheterocyclic skeletons
Source: Royal Society of Chemistry journal article supplement (doi:10.1039/c6cc06148f), 2016-01-01
Supplement: c6cc06148f1.pdf [file c6cc06148f1.pdf]

# Substrate-Controlled Switchable Asymmetric Annulations to Access Polyheterocyclic Skeletons

Kai-Kai Wang,<sup>ac</sup> Pan Wang,<sup>a</sup> Qin Ouyang,<sup>\*b</sup> Wei Du<sup>a</sup> and Ying-Chun Chen<sup>\*ab</sup>

<sup>a</sup> Key Laboratory of Drug-Targeting and Drug Delivery System of the Ministry of Education, West China School of Pharmacy, Sichuan University, Chengdu 610041, China

<sup>b</sup> College of Pharmacy, Third Military Medical University, Shapingba, Chongqing 400038, China

<sup>c</sup> Chengdu Institute of Organic Chemistry, Chinese Academy of Sciences, Chengdu 610041, China

E-mail: ouyangq@tmmu.edu.cn; ycchen@scu.edu.cn

## Supplementary Information

### Table of Contents

1. General methods
2. Preparation of  $\alpha$ -cyano- $\alpha,\beta$ -unsaturated ketones
3. Screening conditions of asymmetric domino reaction
4. Screening conditions of asymmetric [3+2] annulation
5. Exploration of other  $\alpha,\beta$ -unsaturated ketones
6. General procedure for asymmetric domino reactions
7. General procedure for asymmetric [3 + 2] annulations
8. Crystal data and structural refinement for enantiopure 3t and 5a
9. DFT computational calculation studies
10. NMR spectra and HPLC chromatograms

## 1. General methods

NMR data were obtained for  $^1\text{H}$  at 400 MHz or 600 MHz, and for  $^{13}\text{C}$  at 100 MHz or 150 MHz. Chemical shifts were reported in ppm from tetramethylsilane with the solvent resonance as the internal standard in  $\text{CDCl}_3$  solution. ESI HRMS was recorded on a Waters SYNAPT G2. In each case, enantiomeric ratio was determined by HPLC analysis on a chiral column in comparison with authentic racemate, using a Daicel Chiralpak AD-H Column (250  $\times$  4.6 mm), Chiralpak OD-H Column (250  $\times$  4.6 mm), Chiralpak IA Column (250  $\times$  4.6 mm), Chiralpak IB Column (250  $\times$  4.6 mm) or Chiralpak IC Column (250  $\times$  4.6 mm). UV detection was monitored at 220 nm or 254 nm. Optical rotation was measured in  $\text{CHCl}_3$  solution at 20  $^\circ\text{C}$ . Column chromatography was performed on silica gel (200-300 mesh) eluting with ethyl acetate/petroleum ether. TLC was performed on glass-backed silica plates. UV light,  $\text{I}_2$ , and solution of potassium permanganate were used to visualize products. All chemicals were used without purification as commercially available unless otherwise noted. Petroleum ether and ethyl acetate were distilled. THF was freshly distilled from sodium/benzophenone. Unless otherwise noted, experiments involving moisture and/or air sensitive components were performed under a positive pressure of argon in oven-dried glassware equipped with a rubber septum inlet. Dried solvents and liquid reagents were transferred by oven-dried syringes. Morita-Baylis-Hillman carbonates were prepared according to the literature procedures.<sup>1</sup> Cinchona-derived catalysts  $\beta$ -isocupreidine **C1** ( $\beta$ -ICD),  $\alpha$ -isocupreine **C2** ( $\alpha$ -IC), **C3** and **C4** were prepared according to the literature procedures.<sup>2</sup>

(1) (a) Y. M. Chung, Y. J. Im and J. N. Kim, *Bull. Korean Chem. Soc.*, 2002, **23**, 1651; (b) K. Selvakumar, K. A. P. Lingam and R. V. L. Varma, *RSC Adv.*, 2014, **4**, 36538.

(2) (a) Y. Iwabuchi, M. Nakatani, N. Yokoyama and S. Hatakeyama, *J. Am. Chem. Soc.*, 1999, **121**, 10219; (b) H. Waldmann, V. Khedkar, H. Dückert, M. Schürmann, I. M. Opiel and K. Kumar, *Angew. Chem., Int. Ed.*, 2008, **47**, 6869; (c) Y. Nakamoto, F. Urabe, K. Takahashi, J. Ishihara and S. Hatakeyama, *Chem. Eur. J.*, 2013, **19**, 12653.

## 2. Preparation of $\alpha$ -cyano- $\alpha,\beta$ -unsaturated ketones

$\alpha$ -Cyano- $\alpha,\beta$ -unsaturated ketones were prepared according to the literature procedures.<sup>3</sup>

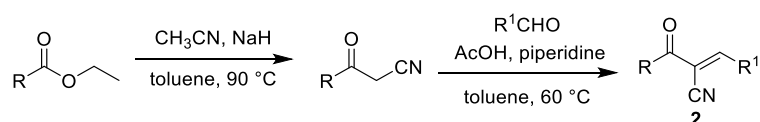

A dry and nitrogen-flushed 150 mL three-neck flask equipped with a magnetic stirring bar was charged with a solution of sodium hydride (60%) (1.5 equiv) and ester (64 mmol) in dry toluene (100 mL). The reaction mixture was stirred at 90  $^\circ\text{C}$ , and acetonitrile (8.0 mL) was added dropwise in 1 h. Then, the mixture was stirred at 90  $^\circ\text{C}$  for 6 h. Saturated  $\text{NH}_4\text{Cl}$  (10 mL) and water (70 mL) were added at 0  $^\circ\text{C}$  to quench the

reaction. The suspension was extracted with ethyl acetate (3×100 mL). The solvent was evaporated and the crude mixture was recrystallized to obtain the 3-oxo-3-propanenitrile as a yellow solid.

A dry 50 mL round flask equipped with a magnetic stirring bar was charged with a solution of 3-oxo-3-propanenitrile (6.0 mmol), aldehyde (6.0 mmol), piperidine (0.2 equiv) and acetic acid (0.2 equiv) in toluene (20 mL). The mixture was heated at 60 °C for 12 h. After cooling to room temperature, the mixture was washed with water (10 mL) and the aqueous phase was extracted with ethyl acetate (3×10 mL). The solvent was evaporated and the crude mixture was subjected to column chromatography (PE/EA=10:1) to obtain the corresponding  $\alpha$ -cyano- $\alpha,\beta$ -unsaturated ketone **2**.

(3) (a) P. K. Amancha, Y.-C. Lai, I.-C. Chen, H.-J. Liu and J.-L. Zhu, *Tetrahedron*, 2010, **66**, 871; (b) W. Liu, J. Zhou, C. Zheng, X. Chen, H. Xiao, Y. Yang, Y. Guo and G. Zhao, *Tetrahedron*, 2011, **67**, 1768.

A few new substates **2**:

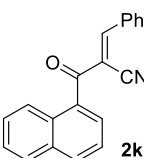 **(E)-2-(1-Naphthoyl)-3-phenylacrylonitrile:**  $^1\text{H}$  NMR (400 MHz,  $\text{CDCl}_3$ )  $\delta$  8.16–8.14 (m, 1H), 8.06 (d,  $J = 8.0$  Hz, 1H), 8.02–7.99 (m, 3H), 7.95–7.93 (m, 1H), 7.74 (d,  $J = 7.2$  Hz, 1H), 7.60–7.54 (m, 4H), 7.50 (t,  $J = 7.6$  Hz, 2H) ppm;  $^{13}\text{C}$  NMR (100 MHz,  $\text{CDCl}_3$ )  $\delta$  191.1, 156.0, 133.74, 133.70, 133.6, 132.5, 131.5, 131.2, 130.4, 129.3, 128.6, 127.9, 127.6, 126.8, 124.9, 124.2, 116.3, 112.4 ppm; ESI-HRMS: calcd. for  $\text{C}_{20}\text{H}_{13}\text{NO}+\text{Na}^+$  306.0889, found 306.0892.

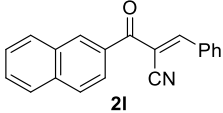 **(E)-2-(2-Naphthoyl)-3-phenylacrylonitrile:**  $^1\text{H}$  NMR (400 MHz,  $\text{CDCl}_3$ )  $\delta$  8.45 (s, 1H), 8.11 (s, 1H), 8.05 (d,  $J = 7.2$  Hz, 2H), 7.99–7.90 (m, 4H), 7.64 (t,  $J = 7.2$  Hz, 1H), 7.59 (t,  $J = 7.2$  Hz, 2H), 7.53 (t,  $J = 7.2$  Hz, 2H) ppm;  $^{13}\text{C}$  NMR (100 MHz,  $\text{CDCl}_3$ )  $\delta$  188.8, 155.4, 135.6, 133.3, 133.0, 132.2, 131.9, 131.2, 131.1, 129.6, 129.3, 128.9, 128.7, 127.9, 127.1, 124.8, 116.9, 110.3 ppm; ESI-HRMS: calcd. for  $\text{C}_{20}\text{H}_{13}\text{NO}+\text{Na}^+$  306.0889, found 306.0890.

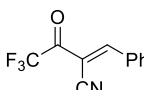 **(E)-2-Benzylidene-4,4,4-trifluoro-3-oxobutanenitrile:**  $^1\text{H}$  NMR (400 MHz,  $\text{CDCl}_3$ )  $\delta$  8.37 (s, 1H), 8.12 (d,  $J = 7.6$  Hz, 2H), 7.69 (t,  $J = 7.2$  Hz, 1H), 7.59 (t,  $J = 7.6$  Hz, 2H) ppm;  $^{13}\text{C}$  NMR (150 MHz,  $\text{CDCl}_3$ )  $\delta$  175.8 (q,  $J = 73.7$  Hz), 159.2 (d,  $J = 0.9$  Hz), 135.5, 132.4, 130.9, 129.7, 115.8 (q,  $J = 289.7$  Hz), 113.8, 103.5 ppm; ESI-HRMS: calcd. for  $\text{C}_{11}\text{H}_6\text{F}_3\text{NO}+\text{Na}^+$  248.0294, found 248.0296.

### 3. Screening conditions of asymmetric domino annulation<sup>a</sup>

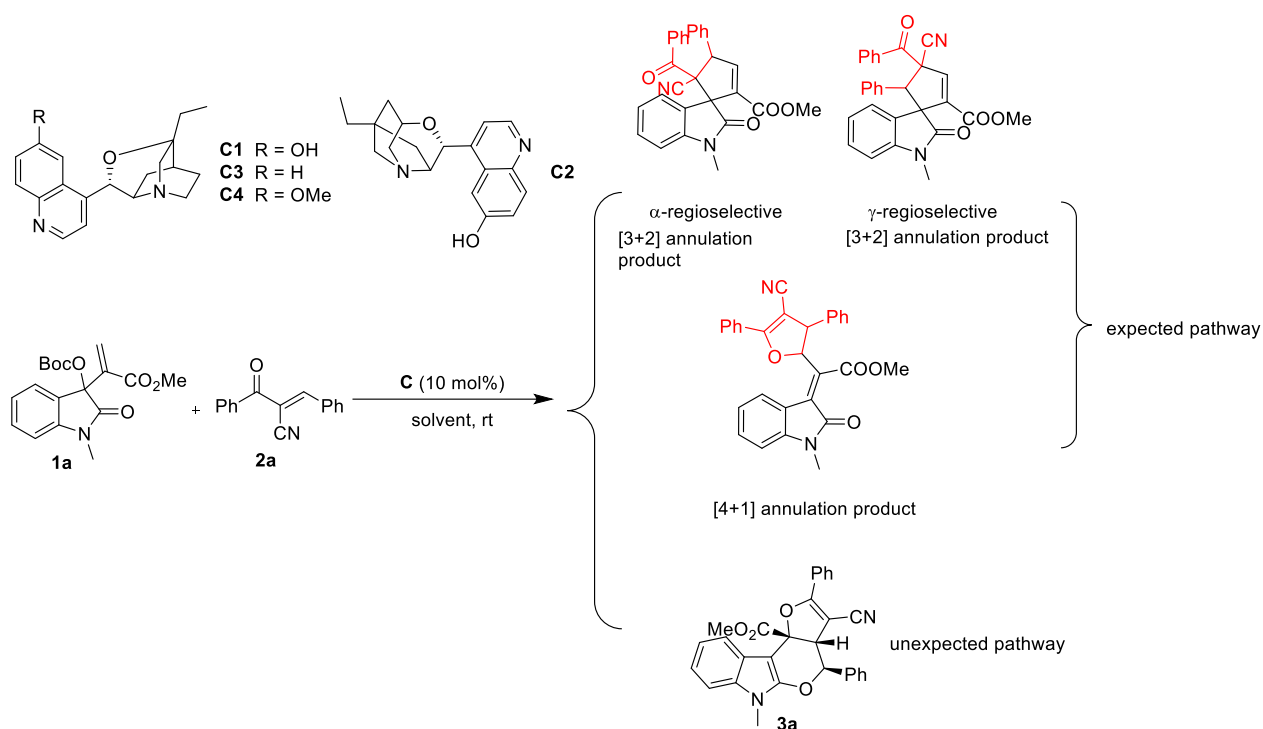

| entry           | catalyst                   | solvent                         | <i>t</i> (h) | yield/% <sup>b</sup> | ee/% <sup>c</sup> |
|-----------------|----------------------------|---------------------------------|--------------|----------------------|-------------------|
| 1               | DABCO                      | CH <sub>2</sub> Cl <sub>2</sub> | 12           | 95                   | –                 |
| 2               | Ph <sub>3</sub> P          | CH <sub>2</sub> Cl <sub>2</sub> | 24           | NR <sup>d</sup>      | –                 |
| 3               | <i>n</i> Bu <sub>3</sub> P | CH <sub>2</sub> Cl <sub>2</sub> | 24           | NR <sup>d</sup>      | –                 |
| 4               | <b>C1</b>                  | CH <sub>2</sub> Cl <sub>2</sub> | 12           | 87                   | 99                |
| 5               | <b>C2</b>                  | CH <sub>2</sub> Cl <sub>2</sub> | 24           | 80                   | –98 <sup>e</sup>  |
| 6               | <b>C3</b>                  | CH <sub>2</sub> Cl <sub>2</sub> | 12           | 92                   | 70                |
| 7               | <b>C4</b>                  | CH <sub>2</sub> Cl <sub>2</sub> | 12           | 85                   | 73                |
| 8               | <b>C1</b>                  | DCE                             | 12           | 91                   | 95                |
| 9               | <b>C1</b>                  | CHCl <sub>3</sub>               | 12           | 89                   | 86                |
| 10              | <b>C1</b>                  | toluene                         | 12           | 92                   | 93                |
| 11              | <b>C1</b>                  | THF                             | 12           | <5                   | –                 |
| 12              | <b>C1</b>                  | CH <sub>3</sub> CN              | 12           | 76                   | 91                |
| 13              | <b>C1</b>                  | Et <sub>2</sub> O               | 12           | 70                   | 94                |
| 14              | <b>C1</b>                  | EtOAc                           | 12           | 92                   | 95                |
| 15 <sup>f</sup> | <b>C1</b>                  | CH <sub>2</sub> Cl <sub>2</sub> | 18           | 85                   | 84                |

<sup>a</sup>Unless noted otherwise, reactions were performed with  $\alpha$ -cyano- $\alpha,\beta$ -unsaturated ketones **2a** (0.1 mmol) and MBH carbonate **1a** (0.1 mmol), catalyst **C** (10 mol%) in solvent (1.0 mL) at room temperature. <sup>b</sup> Isolated yield. <sup>c</sup> Determined by HPLC analysis on a chiral stationary phase; d.r. >19:1 by <sup>1</sup>H NMR analysis. <sup>d</sup>No reaction. <sup>e</sup> Performed at 0 °C. <sup>f</sup> With 5 mol% of **C1**. <sup>g</sup> With 2 mol% of **C1**.

The initial reaction of MBH carbonate **1a** and  $\alpha$ -cyano- $\alpha,\beta$ -unsaturated ketones **2a** proceeded efficiently at room temperature in the presence of DABCO (10 mol%). An unusual [2+1] domino annulation-rearrangement product **3a** was cleanly obtained in a high yield after 12 h (entry 1). The reaction exhibited exclusive diastereoselectivity, and the common [3+2] or [4+1] annulation product was not observed. Ph<sub>3</sub>P and *n*Bu<sub>3</sub>P showed much lower catalytic activity (entries 2 and 3). Consequently, we investigated the asymmetric domino reaction under the catalysis of chiral tertiary amines.  $\beta$ -isocupreidine **C1** ( $\beta$ -ICD, 10 mol%) was found to be highly efficient in the reaction of MBH carbonate **1a** and  $\alpha$ -cyano- $\alpha,\beta$ -unsaturated ketone **2a** in CH<sub>2</sub>Cl<sub>2</sub> at ambient temperature, affording the desired domino product **3a** in a high yield with enantiomeric purity (entry 4).  $\alpha$ -Isocupreine **C2** ( $\alpha$ -IC) also showed high catalytic activity and opposite enantioselectivity to that of  $\beta$ -ICD (entry 5). Chiral amines **C3** and **C4** without a free OH group delivered moderate enantioselectivity (entries 6 and 7). CH<sub>2</sub>Cl<sub>2</sub> was the optimal solvent after further investigation (entries 8–14). The reaction still proceeded well with 5 mol% and 2 mol% of **C1**, albeit with the decreased enantioselectivity (entries 15 and 16).

#### 4. Screening conditions of asymmetric [3+2] annulation<sup>a</sup>

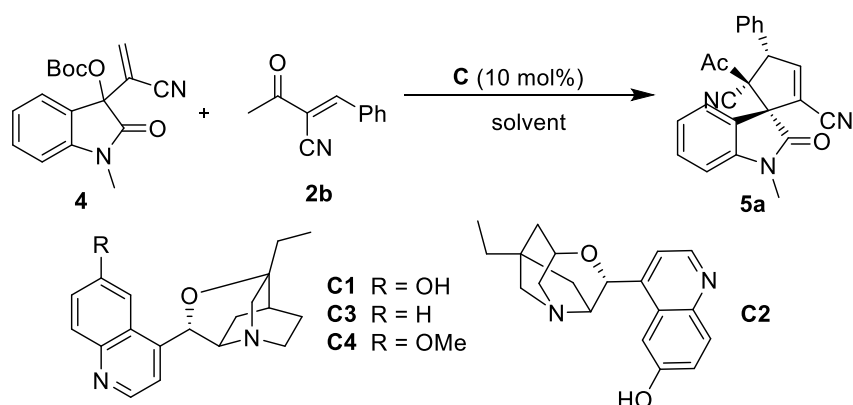

| entry | catalyst          | solvent                         | <i>t</i> (h) | <i>T</i> (°C) | yield/% <sup>b</sup> | ee/% <sup>c</sup> |
|-------|-------------------|---------------------------------|--------------|---------------|----------------------|-------------------|
| 1     | DABCO             | CH <sub>2</sub> Cl <sub>2</sub> | 12           | 0             | 95                   | –                 |
| 2     | DMAP              | CH <sub>2</sub> Cl <sub>2</sub> | 12           | 0             | 94                   | –                 |
| 3     | Ph <sub>3</sub> P | CH <sub>2</sub> Cl <sub>2</sub> | 24           | rt            | NR <sup>d</sup>      | –                 |

|           |                            |                                               |           |            |                   |           |
|-----------|----------------------------|-----------------------------------------------|-----------|------------|-------------------|-----------|
| 4         | <i>t</i> Bu <sub>3</sub> P | CH <sub>2</sub> Cl <sub>2</sub>               | 24        | rt         | NR <sup>d</sup>   | –         |
| 5         | <b>C1</b>                  | CH <sub>2</sub> Cl <sub>2</sub>               | 12        | 0          | 95                | 66        |
| 6         | <b>C2</b>                  | CH <sub>2</sub> Cl <sub>2</sub>               | 12        | 0          | 94                | 30        |
| 7         | <b>C1</b>                  | CH <sub>2</sub> Cl <sub>2</sub>               | 24        | –20        | 92                | 75        |
| 8         | <b>C2</b>                  | CH <sub>2</sub> Cl <sub>2</sub>               | 24        | –20        | 91                | 37        |
| 9         | <b>C3</b>                  | CH <sub>2</sub> Cl <sub>2</sub>               | 24        | –20        | 92                | 86        |
| 10        | <b>C4</b>                  | CH <sub>2</sub> Cl <sub>2</sub>               | 24        | –20        | 90                | 85        |
| 11        | <b>C3</b>                  | CHCl <sub>3</sub>                             | 24        | –20        | 87                | 63        |
| <b>12</b> | <b>C3</b>                  | <b>DCE</b>                                    | <b>24</b> | <b>–20</b> | <b>93</b>         | <b>92</b> |
| 13        | <b>C3</b>                  | CH <sub>3</sub> CN                            | 24        | –20        | 91                | 90        |
| 14        | <b>C3</b>                  | THF                                           | 24        | –20        | 91                | 92        |
| 15        | <b>C3</b>                  | dioxane/CH <sub>2</sub> Cl <sub>2</sub> (5:1) | 24        | –20        | 88                | 90        |
| 16        | <b>C3</b>                  | toluene                                       | 24        | –20        | 71                | 83        |
| 17        | <b>C3</b>                  | EtOAc                                         | 24        | –20        | 89                | 89        |
| 18        | <b>C3</b>                  | Et <sub>2</sub> O                             | 24        | –20        | NR <sup>[d]</sup> | –         |
| 19        | <b>C3</b>                  | DCE                                           | 36        | –30        | 92                | 91        |
| 20        | <b>C3</b>                  | THF                                           | 36        | –30        | 91                | 92        |

<sup>a</sup>Unless noted otherwise, reactions were performed with  $\alpha$ -cyano- $\alpha,\beta$ -unsaturated ketones **2b** (0.1 mmol) and MBH carbonate **4** (0.1 mmol), catalyst **C** (10 mol%) in solvent (1.0 mL). <sup>b</sup>Isolated yield. <sup>c</sup>Determined by HPLC analysis on a chiral stationary phase; d.r. >19:1 by <sup>1</sup>H NMR analysis. <sup>d</sup>No reaction.

To explore the catalytic asymmetric version of [3+2] annulation between  $\alpha$ -cyano- $\alpha,\beta$ -unsaturated ketone **2b** and MBH carbonate **4** from isatin and acrylonitrile, more conditions were screened. In the model reaction in CH<sub>2</sub>Cl<sub>2</sub> at 0 °C catalyzed by DABCO and DMAP, the reaction could smoothly afford the desired [3+2] product **5a** with excellent  $\alpha$ -regioselective and diastereoselectivity (entries 1 and 2). Unfortunately, when phosphine catalysts were used, no reaction took place (entries 3 and 4). When **C1** or **C2** was used, the reaction could smoothly afford the desired [3+2] product **5a** while the enantioselectivity was low to moderate (entries 5–8). Chiral amines **C3** and **C4** without a free OH group delivered better enantioselectivity (entries 9 and 10). To further enhance the stereoselectivity, we continued optimizing a number of reaction parameters. Solvent screening revealed that DCE was the best solvent (entries 11–18). Lowering the reaction temperature did not offer further improvement (entries 19 and 20).

## 5. Exploration of other $\alpha,\beta$ -unsaturated ketones

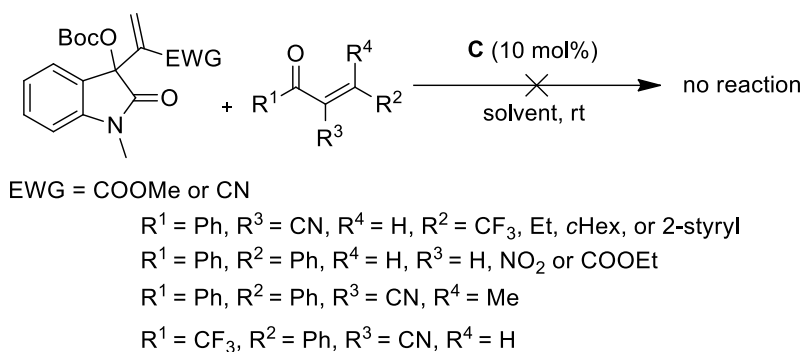

More  $\alpha,\beta$ -unsaturated ketones with different substitutions at  $\alpha$  or  $\beta$  site were tested in the domino annulation reaction and [3+2] annulation reaction. Nevertheless, The reaction hardly proceeded when  $R^2$  is an alkyl group, 2-styryl group or  $\text{CF}_3$ . Notably, the cyano group at the  $\alpha$ -position of enone **2a** was essential for the reaction. When it was replaced by H,  $\text{NO}_2$  or  $\text{CO}_2\text{Me}$ , basically no reaction took place. Moreover, the tetrasubstituted alkene ( $R^4 = \text{Me}$ ) failed to give the corresponding products, probably because of the crowded structures. When  $R^1$  is a  $\text{CF}_3$  group, unfortunately, no reaction was observed.

## 6. General procedure for asymmetric domino annulations

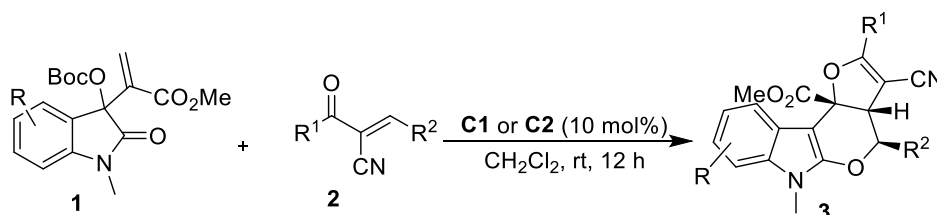

The Morita-Baylis-Hillman (MBH) carbonate **1** (0.1 mmol),  $\alpha$ -cyano- $\alpha,\beta$ -unsaturated ketones **2** (0.1 mmol), and catalyst **C1** or **C2** (3.1 mg, 0.01 mmol) were dissolved in  $\text{CH}_2\text{Cl}_2$  (1.0 mL). Then the solution was stirred at rt or  $0^\circ\text{C}$ . After completion, the mixture was directly purified by column chromatography on silica gel eluting with petroleum ether/ethyl acetate (10:1 to 5:1) to afford the product **3**.

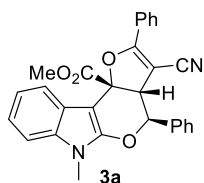

**3a**, 40.2 mg, 87% yield, white solid;  $[\alpha]_{\text{D}}^{20} = -165.9$  ( $c = 1.20$  in  $\text{CHCl}_3$ ); 99% ee, determined by HPLC analysis [Chiralpak AD, *n*-hexane/*i*-PrOH = 60/40, 1.0 mL/min,  $\lambda = 254$  nm,  $t$  (major) = 5.37 min,  $t$  (minor) = 6.81 min];  $^1\text{H}$  NMR (400 MHz,  $\text{CDCl}_3$ )  $\delta$  (ppm) 8.13 (d,  $J = 7.2$  Hz, 2H), 7.67–7.63 (m, 3H), 7.58–7.56 (m, 3H), 7.54–7.47 (m, 3H), 7.26–7.22 (m, 3H), 4.99 (d,  $J = 10.8$  Hz, 1H), 4.07 (d,  $J = 10.8$  Hz, 1H), 3.80 (s, 3H), 3.62 (s, 3H);  $^{13}\text{C}$  NMR (100 MHz,  $\text{CDCl}_3$ )  $\delta$  (ppm) 171.0, 169.8, 152.1, 135.3, 132.7, 132.1, 130.2, 129.0, 128.7, 128.4, 127.8, 127.5, 124.0, 121.1, 121.0, 117.7, 115.8, 108.8, 86.2, 83.6, 83.1, 79.7, 53.3, 51.1, 27.7; ESI-HRMS: calcd. for  $\text{C}_{29}\text{H}_{22}\text{N}_2\text{O}_4 + \text{Na}^+$  485.1472, found 485.1477.

Enantiomer of **3a**, 37.0 mg, 80% yield, white solid;  $[\alpha]_{\text{D}}^{20} = +165.0$  ( $c = 1.20$  in  $\text{CHCl}_3$ );  $-98\%$  ee, determined by HPLC analysis [Chiralpak AD,  $n$ -hexane/ $i$ -PrOH = 60/40, 1.0 mL/min,  $\lambda = 254$  nm,  $t$  (minor) = 5.91 min,  $t$  (major) = 7.73 min]

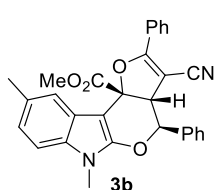

**3b**, 45.2 mg, 95% yield, white solid;  $[\alpha]_{\text{D}}^{20} = -89.6$  ( $c = 0.24$  in  $\text{CHCl}_3$ ); 93% ee, determined by HPLC analysis [Chiralpak AD,  $n$ -hexane/ $i$ -PrOH = 80/20, 1.0 mL/min,  $\lambda = 254$  nm,  $t$  (major) = 7.12 min,  $t$  (minor) = 9.24 min];  $^1\text{H}$  NMR (400 MHz,  $\text{CDCl}_3$ )  $\delta$  (ppm) 8.14 (d,  $J = 7.2$  Hz, 2H), 7.64–7.62 (m, 2H), 7.57–7.56 (m, 3H), 7.54–7.48 (m, 3H), 7.43 (s, 1H), 7.15 (d,  $J = 8.4$  Hz, 1H), 7.05 (d,  $J = 8.0$  Hz, 1H), 4.97 (d,  $J = 10.8$  Hz, 1H), 4.04 (d,  $J = 10.8$  Hz, 1H), 3.80 (s, 3H), 3.59 (s, 3H), 2.51 (s, 3H);  $^{13}\text{C}$  NMR (100 MHz,  $\text{CDCl}_3$ )  $\delta$  (ppm) 171.0, 169.9, 152.0, 135.4, 132.1, 130.9, 130.4, 130.1, 129.0, 128.7, 128.4, 127.8, 127.5, 124.1, 122.2, 117.7, 115.8, 108.5, 86.3, 83.1, 83.0, 79.7, 53.2, 51.1, 27.7, 21.6; ESI-HRMS: calcd. for  $\text{C}_{30}\text{H}_{24}\text{N}_2\text{O}_4 + \text{Na}^+$  499.1628, found 499.1631.

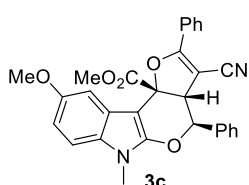

**3c**, 44.3 mg, 90% yield, white solid;  $[\alpha]_{\text{D}}^{20} = -285.9$  ( $c = 1.00$  in  $\text{CHCl}_3$ );  $> 99\%$  ee, determined by HPLC analysis [Chiralpak AD,  $n$ -hexane/ $i$ -PrOH = 60/40, 1.0 mL/min,  $\lambda = 254$  nm,  $t$  (major) = 5.83 min,  $t$  (minor) = 7.07 min];  $^1\text{H}$  NMR (400 MHz,  $\text{CDCl}_3$ )  $\delta$  (ppm) 8.10 (d,  $J = 6.8$  Hz, 2H), 7.62–7.61 (m, 2H), 7.56–7.54 (m, 3H), 7.53–7.46 (m, 3H), 7.15–7.13 (m, 2H), 6.84 (dd,  $J = 8.8, 2.4$  Hz, 1H), 4.96 (d,  $J = 10.8$  Hz, 1H), 4.04 (d,  $J = 10.8$  Hz, 1H), 3.90 (s, 3H), 3.79 (s, 3H), 3.57 (s, 3H);  $^{13}\text{C}$  NMR (100 MHz,  $\text{CDCl}_3$ )  $\delta$  (ppm) 171.0, 169.9, 155.2, 152.4, 135.3, 132.1, 130.2, 129.0, 128.7, 128.4, 127.8, 127.6, 127.5, 124.7, 115.8, 109.5, 109.3, 101.5, 86.3, 83.5, 83.0, 79.8, 56.0, 53.3, 51.1, 27.8; ESI-HRMS: calcd. for  $\text{C}_{30}\text{H}_{24}\text{N}_2\text{O}_5 + \text{Na}^+$  515.1577, found 515.1578.

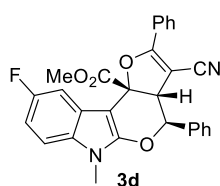

**3d**, 43.2 mg, 90% yield, white solid;  $[\alpha]_{\text{D}}^{20} = -267.0$  ( $c = 0.90$  in  $\text{CHCl}_3$ ); 91% ee, determined by HPLC analysis [Chiralpak AD,  $n$ -hexane/ $i$ -PrOH = 60/40, 1.0 mL/min,  $\lambda = 254$  nm,  $t$  (major) = 5.40 min,  $t$  (minor) = 6.34 min];  $^1\text{H}$  NMR (400 MHz,  $\text{CDCl}_3$ )  $\delta$  (ppm) 8.10 (d,  $J = 7.2$  Hz, 2H), 7.60 (s, 2H), 7.56–7.54 (m, 3H), 7.53–7.47 (m, 3H), 7.32 (dd,  $J = 9.2, 1.6$  Hz, 1H), 7.15 (dd,  $J = 8.8, 4.4$  Hz, 1H), 6.96–6.91 (m, 1H), 4.97 (d,  $J = 10.8$  Hz, 1H), 4.06 (d,  $J = 10.8$  Hz, 1H), 3.81 (s, 3H), 3.59 (s, 3H);  $^{13}\text{C}$  NMR (100 MHz,  $\text{CDCl}_3$ )  $\delta$  (ppm) 170.8, 169.8, 158.8 (d,  $J = 234.2$  Hz), 153.0, 135.1, 132.2, 130.3, 129.1 (d,  $J = 3.0$  Hz), 128.8, 128.4, 127.8, 127.4, 124.6 (d,  $J = 10.7$  Hz), 115.7, 109.5 (d,  $J = 9.7$  Hz), 108.6 (d,  $J = 25.5$  Hz), 103.7 (d,  $J = 25.2$  Hz), 85.9, 84.0 (d,  $J = 4.0$  Hz), 83.2, 79.8, 53.4, 51.0, 27.9; ESI-HRMS: calcd. for  $\text{C}_{29}\text{H}_{21}\text{FN}_2\text{O}_4 + \text{Na}^+$  503.1378, found 503.1377.

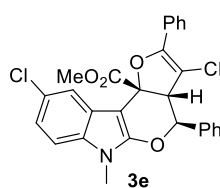

**3e**, 45.1 mg, 91% yield, white solid;  $[\alpha]_{\text{D}}^{20} = -186.7$  ( $c = 0.36$  in  $\text{CHCl}_3$ ); 97% ee, determined by HPLC analysis [Chiralpak AD,  $n$ -hexane/ $i$ -PrOH = 70/30, 1.0 mL/min,  $\lambda = 254$  nm,  $t$  (major) = 6.07 min,  $t$  (minor) = 7.75 min];  $^1\text{H}$  NMR (400 MHz,  $\text{CDCl}_3$ )  $\delta$  (ppm) 8.10 (d,  $J = 7.2$  Hz, 2H), 7.60 (d,  $J = 3.6$  Hz, 3H), 7.56–7.55 (m, 3H), 7.54–7.47 (m, 3H), 7.18–7.13 (m, 2H), 4.96 (d,  $J = 10.8$  Hz, 1H), 4.05 (d,  $J = 10.8$  Hz, 1H), 3.81 (s, 3H), 3.59 (s, 3H);  $^{13}\text{C}$  NMR (100 MHz,  $\text{CDCl}_3$ )  $\delta$  (ppm) 170.8, 169.8, 152.8, 135.0, 132.3, 131.1, 130.3, 129.1, 128.8, 128.4,



127.8, 127.4, 126.8, 125.1, 121.2, 117.4, 115.7, 109.9, 85.8, 83.7, 83.3, 79.7, 53.4, 51.1, 27.9; ESI-HRMS: calcd. for  $C_{29}H_{21}ClN_2O_4+Na^+$  519.1082, found 519.1086.

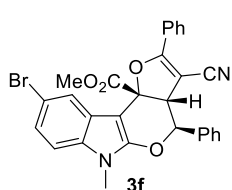

**3f**, 48.6 mg, 90% yield, white solid;  $[\alpha]_D^{20} = -105.7$  ( $c = 1.00$  in  $CHCl_3$ ); 99% ee, determined by HPLC analysis [Chiralpak AD,  $n$ -hexane/ $i$ -PrOH = 60/40, 1.0 mL/min,  $\lambda = 254$  nm,  $t$  (major) = 5.61 min,  $t$  (minor) = 7.09 min];  $^1H$  NMR (400 MHz,  $CDCl_3$ )  $\delta$  (ppm) 8.10 (d,  $J = 7.2$  Hz, 2H), 7.74 (d,  $J = 1.2$  Hz, 1H), 7.60 (d,  $J = 2.8$  Hz, 2H), 7.56–7.54 (m, 3H), 7.52–7.47 (m, 3H), 7.30 (dd,  $J = 8.8, 1.6$  Hz, 1H), 7.11 (d,  $J = 8.4$  Hz, 1H), 4.96 (d,  $J = 10.8$  Hz, 1H), 4.05 (d,  $J = 11.2$  Hz, 1H), 3.81 (s, 3H), 3.58 (s, 3H);  $^{13}C$  NMR (100 MHz,  $CDCl_3$ )  $\delta$  (ppm) 170.8, 169.8, 152.7, 135.0, 132.3, 131.4, 130.3, 129.1, 128.8, 128.4, 127.9, 127.3, 125.7, 123.8, 120.4, 115.7, 114.4, 110.3, 85.7, 83.6, 83.3, 79.7, 53.5, 51.0, 27.9; ESI-HRMS: calcd. for  $C_{29}H_{21}BrN_2O_4+Na^+$  563.0577 ( $^{79}Br$ ) and 565.0556 ( $^{81}Br$ ), found 563.0582, 565.0562.

Enantiomer of **3f**, 48.6 mg, 90% yield, white solid;  $[\alpha]_D^{20} = +104.2$  ( $c = 1.00$  in  $CHCl_3$ ); -97% ee, determined by HPLC analysis [Chiralpak AD,  $n$ -hexane/ $i$ -PrOH = 60/40, 1.0 mL/min,  $\lambda = 254$  nm,  $t$  (minor) = 5.62 min,  $t$  (major) = 7.09 min.

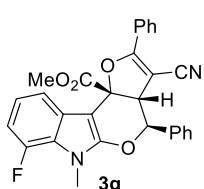

**3g**, 42.2 mg, 88% yield, white solid;  $[\alpha]_D^{20} = -221.8$  ( $c = 1.20$  in  $CHCl_3$ ); 97% ee, determined by HPLC analysis [Chiralpak IC,  $n$ -hexane/ $i$ -PrOH = 60/40, 1.0 mL/min,  $\lambda = 254$  nm,  $t$  (major) = 8.86 min,  $t$  (minor) = 7.81 min];  $^1H$  NMR (400 MHz,  $CDCl_3$ )  $\delta$  (ppm) 8.10 (d,  $J = 7.6$  Hz, 2H), 7.62–7.61 (m, 2H), 7.57–7.55 (m, 3H), 7.54–7.47 (m, 3H), 7.37 (d,  $J = 7.6$  Hz, 1H), 7.10–7.05 (m, 1H), 6.89 (dd,  $J = 12.4, 8.4$  Hz, 1H), 4.97 (d,  $J = 10.8$  Hz, 1H), 4.03 (d,  $J = 10.8$  Hz, 1H), 3.81 (s, 3H), 3.79 (s, 3H);  $^{13}C$  NMR (100 MHz,  $CDCl_3$ )  $\delta$  (ppm) 170.9, 169.9, 152.0 (dd,  $J = 315.9$  Hz, 125.5 Hz), 135.1, 133.38 (d,  $J = 3.2$  Hz), 132.2, 131.1, 130.3, 129.3 (d,  $J = 1.4$  Hz), 129.0, 128.7, 128.4, 127.8, 127.4, 121.3 (d,  $J = 6.9$  Hz), 115.7, 113.5 (d,  $J = 3.3$  Hz), 107.4 (d,  $J = 17.8$  Hz), 85.9 (s), 84.6 (s), 83.3 (s), 79.7 (s), 53.4 (s), 51.1 (s), 30.4 (d,  $J = 5.3$  Hz); ESI-HRMS: calcd. for  $C_{29}H_{21}FN_2O_4+Na^+$  503.1378, found 503.1380.

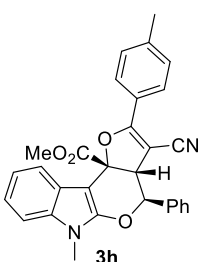

**3h**, 43.8 mg, 92% yield, white solid;  $[\alpha]_D^{20} = -57.0$  ( $c = 0.80$  in  $CHCl_3$ ); 84% ee, determined by HPLC analysis [Chiralpak OD,  $n$ -hexane/ $i$ -PrOH = 80/20, 1.0 mL/min,  $\lambda = 254$  nm,  $t$  (major) = 11.29 min,  $t$  (minor) = 10.20 min];  $^1H$  NMR (400 MHz,  $CDCl_3$ )  $\delta$  (ppm) 7.98 (d,  $J = 8.0$  Hz, 2H), 7.63–7.59 (m, 3H), 7.54–7.53 (m, 3H), 7.26–7.18 (m, 5H), 4.94 (d,  $J = 10.8$  Hz, 1H), 4.01 (d,  $J = 10.8$  Hz, 1H), 3.76 (s, 3H), 3.59 (s, 3H), 2.40 (s, 3H);  $^{13}C$  NMR (100 MHz,  $CDCl_3$ )  $\delta$  (ppm) 171.1, 170.0, 152.1, 142.9, 135.4, 132.7, 130.1, 129.4, 129.0, 128.4, 127.8, 124.8, 124.0, 121.0, 120.9, 117.7, 116.1, 108.8, 86.0, 83.6, 83.2, 78.7, 53.3, 51.0, 27.7, 21.7; ESI-HRMS: calcd. for  $C_{30}H_{24}N_2O_4+Na^+$  499.1628, found 499.1626.

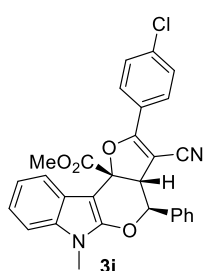

**3i**, 47.1 mg, 95% yield, white solid;  $[\alpha]_{\text{D}}^{20} = -241.8$  ( $c = 1.25$  in  $\text{CHCl}_3$ ); 90% ee, determined by HPLC analysis [Chiralpak OD, *n*-hexane/*i*-PrOH = 80/20, 1.0 mL/min,  $\lambda = 254$  nm,  $t$  (major) = 7.92 min,  $t$  (minor) = 13.02 min];  $^1\text{H}$  NMR (400 MHz,  $\text{CDCl}_3$ )  $\delta$  (ppm) 8.03 (d,  $J = 8.4$  Hz, 2H), 7.61–7.59 (m, 3H), 7.54–7.53 (m, 3H), 7.43 (d,  $J = 8.4$  Hz, 2H), 7.25–7.17 (m, 3H), 4.94 (d,  $J = 10.8$  Hz, 1H), 4.02 (d,  $J = 10.8$  Hz, 1H), 3.76 (s, 3H), 3.59 (s, 3H);  $^{13}\text{C}$  NMR (100 MHz,  $\text{CDCl}_3$ )  $\delta$  (ppm) 170.9, 168.7, 152.1, 138.3, 135.2, 132.7, 130.3, 129.1, 129.0, 128.4, 125.9, 123.9, 121.12, 121.06, 117.6, 115.6, 108.9, 86.4, 83.4, 83.0, 80.2, 53.4, 51.1, 27.7; ESI-HRMS: calcd. for  $\text{C}_{29}\text{H}_{21}\text{ClN}_2\text{O}_4 + \text{Na}^+$  519.1082, found 519.1088.

Enantiomer of **3i**, 46.1 mg, 93% yield, white solid;  $[\alpha]_{\text{D}}^{20} = +242.0$  ( $c = 1.25$  in  $\text{CHCl}_3$ ); –90% ee, determined by HPLC analysis [Chiralpak OD, *n*-hexane/*i*-PrOH = 80/20, 1.0 mL/min,  $\lambda = 254$  nm,  $t$  (minor) = 8.56 min,  $t$  (major) = 13.57 min.

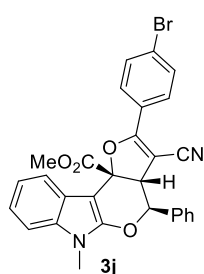

**3j**, 49.2 mg, 95% yield, white solid;  $[\alpha]_{\text{D}}^{20} = -133.4$  ( $c = 1.00$  in  $\text{CHCl}_3$ ); 91% ee, determined by HPLC analysis [Chiralpak OD, *n*-hexane/*i*-PrOH = 60/40, 1.0 mL/min,  $\lambda = 254$  nm,  $t$  (major) = 10.52 min,  $t$  (minor) = 15.63 min];  $^1\text{H}$  NMR (400 MHz,  $\text{CDCl}_3$ )  $\delta$  (ppm) 7.95 (d,  $J = 8.4$  Hz, 2H), 7.61–7.59 (m, 5H), 7.55–7.54 (m, 3H), 7.24 (s, 1H), 7.21–7.19 (m, 2H), 4.95 (d,  $J = 10.8$  Hz, 1H), 4.02 (d,  $J = 10.8$  Hz, 1H), 3.77 (s, 3H), 3.60 (s, 3H);  $^{13}\text{C}$  NMR (100 MHz,  $\text{CDCl}_3$ )  $\delta$  (ppm) 170.9, 168.8, 152.1, 135.2, 132.7, 132.1, 130.3, 129.2, 129.1, 128.4, 126.9, 126.4, 124.0, 121.2, 121.1, 117.7, 115.6, 108.9, 86.5, 83.4, 83.0, 80.4, 53.4, 51.2, 27.8; ESI-HRMS: calcd. for  $\text{C}_{29}\text{H}_{21}\text{BrN}_2\text{O}_4 + \text{H}^+$  541.0757 ( $^{79}\text{Br}$ ) and 543.0737 ( $^{81}\text{Br}$ ), found 541.0759, 543.0746.

Enantiomer of **3j**, 49.7 mg, 96% yield, white solid;  $[\alpha]_{\text{D}}^{20} = +134.0$  ( $c = 1.00$  in  $\text{CHCl}_3$ ); –92% ee, determined by HPLC analysis [Chiralpak OD, *n*-hexane/*i*-PrOH = 60/40, 1.0 mL/min,  $\lambda = 254$  nm,  $t$  (minor) = 10.99 min,  $t$  (major) = 16.28 min.

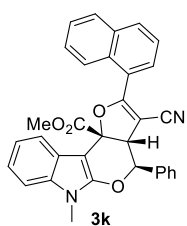

**3k**, 49.2 mg, 96% yield, white solid;  $[\alpha]_{\text{D}}^{20} = -371.3$  ( $c = 1.20$  in  $\text{CHCl}_3$ ); 97% ee, determined by HPLC analysis [Chiralpak AD, *n*-hexane/*i*-PrOH = 80/20, 1.0 mL/min,  $\lambda = 254$  nm,  $t$  (major) = 9.92 min,  $t$  (minor) = 16.87 min];  $^1\text{H}$  NMR (400 MHz,  $\text{CDCl}_3$ )  $\delta$  (ppm) 8.63 (d,  $J = 9.6$  Hz, 1H), 7.98 (d,  $J = 8.4$  Hz, 1H), 7.92 (d,  $J = 6.8$  Hz, 1H), 7.88 (d,  $J = 8.0$  Hz, 1H), 7.68–7.64 (m, 3H), 7.61–7.50 (m, 6H), 7.24–7.14 (m, 3H), 5.11 (d,  $J = 10.8$  Hz, 1H), 4.15 (d,  $J = 10.4$  Hz, 1H), 3.84 (s, 3H), 3.62 (s, 3H);  $^{13}\text{C}$  NMR (100 MHz,  $\text{CDCl}_3$ )  $\delta$  (ppm) 173.0, 171.0, 152.0, 135.3, 133.6, 132.7, 132.5, 130.6, 130.3, 129.3, 129.1, 128.5, 128.4, 127.4, 126.5, 125.6, 124.9, 124.8, 124.0, 121.1, 121.0, 118.0, 115.1, 108.8, 87.3, 84.2, 83.7, 83.6, 53.4, 50.7, 27.7; ESI-HRMS: calcd. for  $\text{C}_{33}\text{H}_{24}\text{N}_2\text{O}_4 + \text{H}^+$  513.1809, found 513.1812.

Enantiomer of **3k**, 49.2 mg, 96% yield, white solid;  $[\alpha]_{\text{D}}^{20} = +371.0$  ( $c = 1.20$  in  $\text{CHCl}_3$ ); –97% ee, determined by HPLC analysis [Chiralpak AD, *n*-hexane/*i*-PrOH = 80/20, 1.0 mL/min,  $\lambda = 254$  nm,  $t$  (minor) = 9.76 min,  $t$  (major) = 16.47 min.

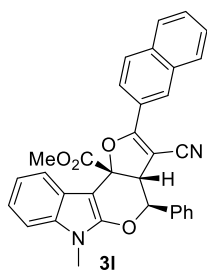

**3l**, 48.6 mg, 95% yield, white solid;  $[\alpha]_D^{20} = -279.3$  ( $c = 0.80$  in  $\text{CHCl}_3$ ); 84% ee, determined by HPLC analysis [Chiralpak AD, *n*-hexane/*i*-PrOH = 60/40, 1.0 mL/min,  $\lambda = 254$  nm,  $t$  (major) = 15.38 min,  $t$  (minor) = 16.57 min];  $^1\text{H NMR}$  (400 MHz,  $\text{CDCl}_3$ )  $\delta$  (ppm) 8.61 (s, 1H), 8.15 (d,  $J = 8.8$  Hz, 1H), 7.97 (d,  $J = 8.0$  Hz, 1H), 7.89 (d,  $J = 8.4$  Hz, 1H), 7.86 (d,  $J = 7.6$  Hz, 1H), 7.70–7.68 (m, 1H), 7.64–7.63 (m, 2H), 7.59–7.52 (m, 5H), 7.25–7.22 (m, 3H), 5.01 (d,  $J = 10.8$  Hz, 1H), 4.08 (d,  $J = 10.8$  Hz, 1H), 3.78 (s, 3H), 3.61 (s, 3H);  $^{13}\text{C NMR}$  (100 MHz,  $\text{CDCl}_3$ )  $\delta$  (ppm) 171.1, 169.8, 152.2, 135.4, 134.9, 132.8, 132.6, 130.2, 129.3, 129.1, 128.9, 128.53, 128.47, 128.2, 127.7, 126.9, 124.9, 124.1, 123.6, 121.1, 121.0, 117.8, 116.0, 108.9, 86.2, 83.6, 83.2, 80.1, 53.3, 51.3, 27.8; ESI-HRMS: calcd. for  $\text{C}_{33}\text{H}_{24}\text{N}_2\text{O}_4 + \text{H}^+$  513.1809, found 513.1808.

Enantiomer of **3l**, 48.6 mg, 95% yield, white solid;  $[\alpha]_D^{20} = +280.2$  ( $c = 0.80$  in  $\text{CHCl}_3$ ); –85% ee, determined by HPLC analysis [Chiralpak AD, *n*-hexane/*i*-PrOH = 60/40, 1.0 mL/min,  $\lambda = 254$  nm,  $t$  (minor) = 14.52 min,  $t$  (major) = 15.60 min

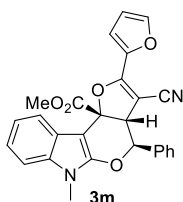

**3m**, 40.7 mg, 90% yield, white solid;  $[\alpha]_D^{20} = -253.5$  ( $c = 1.00$  in  $\text{CHCl}_3$ ); 96% ee, determined by HPLC analysis [Chiralpak AD, *n*-hexane/*i*-PrOH = 70/30, 1.0 mL/min,  $\lambda = 254$  nm,  $t$  (major) = 8.00 min,  $t$  (minor) = 10.62 min];  $^1\text{H NMR}$  (400 MHz,  $\text{CDCl}_3$ )  $\delta$  (ppm) 7.62–7.58 (m, 4H), 7.53–7.52 (m, 3H), 7.24–7.22 (m, 1H), 7.20 (d,  $J = 2.0$  Hz, 1H), 7.18 (dd,  $J = 5.6, 3.2$  Hz, 2H), 6.55 (dd,  $J = 3.6, 1.2$  Hz, 1H), 4.92 (d,  $J = 11.2$  Hz, 1H), 4.01 (d,  $J = 10.8$  Hz, 1H), 3.76 (s, 3H), 3.59 (s, 3H);  $^{13}\text{C NMR}$  (100 MHz,  $\text{CDCl}_3$ )  $\delta$  (ppm) 170.7, 160.4, 152.1, 146.1, 143.3, 135.2, 132.7, 130.2, 129.0, 128.4, 124.0, 121.12, 121.05, 117.8, 115.8, 114.9, 112.1, 108.8, 87.0, 83.4, 83.1, 78.3, 53.3, 50.6, 27.8; ESI-HRMS: calcd. for  $\text{C}_{27}\text{H}_{20}\text{N}_2\text{O}_5 + \text{Na}^+$  475.1264, found 475.1270.

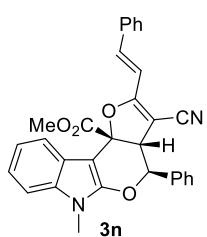

**3n**, 44.9 mg, 92% yield, yellow solid;  $[\alpha]_D^{20} = -177.8$  ( $c = 0.90$  in  $\text{CHCl}_3$ ); 96% ee, determined by HPLC analysis [Chiralpak AD, *n*-hexane/*i*-PrOH = 80/20, 1.0 mL/min,  $\lambda = 254$  nm,  $t$  (major) = 18.89 min,  $t$  (minor) = 10.36 min];  $^1\text{H NMR}$  (400 MHz,  $\text{CDCl}_3$ )  $\delta$  (ppm) 7.65–7.63 (m, 1H), 7.58 (d,  $J = 2.4$  Hz, 2H), 7.55–7.51 (m, 6H), 7.41–7.37 (m, 3H), 7.23–7.20 (m, 3H), 6.84 (d,  $J = 16.0$  Hz, 1H), 4.89 (d,  $J = 10.8$  Hz, 1H), 3.98 (d,  $J = 10.8$  Hz, 1H), 3.77 (s, 3H), 3.60 (s, 3H);  $^{13}\text{C NMR}$  (150 MHz,  $\text{CDCl}_3$ )  $\delta$  (ppm) 171.0, 169.7, 152.1, 139.7, 135.3, 134.7, 132.7, 130.2, 130.1, 129.0, 128.9, 128.4, 128.0, 124.0, 121.11, 121.05, 117.8, 115.0, 112.9, 108.9, 86.5, 83.7, 83.1, 83.0, 53.3, 50.5, 27.8; ESI-HRMS: calcd. for  $\text{C}_{31}\text{H}_{24}\text{N}_2\text{O}_4 + \text{Na}^+$  511.1628, found 511.1631.

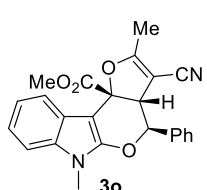

**3o**, 36.0 mg, 90% yield, white solid;  $[\alpha]_D^{20} = -156.5$  ( $c = 0.60$  in  $\text{CHCl}_3$ ); 83% ee, determined by HPLC analysis [Chiralpak AD, *n*-hexane/*i*-PrOH = 60/40, 1.0 mL/min,  $\lambda = 254$  nm,  $t$  (major) = 5.17 min,  $t$  (minor) = 6.03 min];  $^1\text{H NMR}$  (400 MHz,  $\text{CDCl}_3$ )  $\delta$  (ppm) 7.55–7.51 (m, 6H), 7.24–7.14 (m, 3H), 4.81 (d,  $J = 10.8$  Hz, 1H), 3.88 (d,  $J = 10.8$  Hz, 1H), 3.76 (s, 3H), 3.58 (s, 3H), 2.21 (s, 3H);  $^{13}\text{C NMR}$  (100 MHz,  $\text{CDCl}_3$ )  $\delta$  (ppm) 174.3, 171.0, 152.0, 135.3,

132.7, 130.2, 129.0, 128.4, 123.8, 121.1, 121.0, 117.7, 114.9, 108.8, 87.1, 83.6, 83.4, 83.0, 53.3, 50.1, 27.7, 14.5; ESI-HRMS: calcd. for  $C_{24}H_{20}N_2O_4+Na^+$  423.1315, found 423.1318.

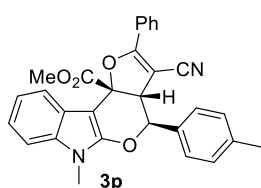

**3p**, 43.3 mg, 91% yield, white solid;  $[\alpha]_D^{20} = -258.6$  ( $c = 1.60$  in  $CHCl_3$ ); 87% ee, determined by HPLC analysis [Chiralpak AD, *n*-hexane/*i*-PrOH = 60/40, 1.0 mL/min,  $\lambda = 254$  nm,  $t$  (major) = 5.59 min,  $t$  (minor) = 6.46 min];  $^1H$  NMR (400 MHz,  $CDCl_3$ )  $\delta$  (ppm) 8.09 (d,  $J = 7.2$  Hz, 2H), 7.62–7.60 (m, 1H), 7.50–7.44 (m, 5H), 7.34 (d,  $J = 7.8$  Hz, 2H), 7.24–7.18 (m, 3H), 4.92 (d,  $J = 10.8$  Hz, 1H), 4.03 (d,  $J = 10.8$  Hz, 1H), 3.77 (s, 3H), 3.58 (s, 3H), 2.44 (s, 3H);  $^{13}C$  NMR (100 MHz,  $CDCl_3$ )  $\delta$  (ppm) 171.1, 169.9, 152.2, 140.2, 132.7, 132.3, 132.1, 129.7, 128.7, 128.4, 127.8, 127.6, 124.0, 121.0, 120.9, 117.7, 115.9, 108.8, 86.2, 83.5, 83.0, 79.9, 53.3, 50.9, 27.7, 21.4; ESI-HRMS: calcd. for  $C_{30}H_{24}N_2O_4+Na^+$  499.1628, found 499.1629.

Enantiomer of **3p**, 42.8 mg, 90% yield, white solid;  $[\alpha]_D^{20} = +260.2$  ( $c = 1.80$  in  $CHCl_3$ ); -90% ee, determined by HPLC analysis [Chiralpak AD, *n*-hexane/*i*-PrOH = 60/40, 1.0 mL/min,  $\lambda = 254$  nm,  $t$  (minor) = 5.64 min,  $t$  (major) = 6.53 min.

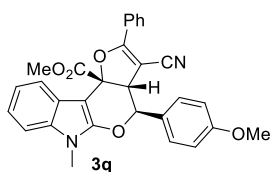

**3q**, 46.2 mg, 94% yield, white solid;  $[\alpha]_D^{20} = -201.1$  ( $c = 1.40$  in  $CHCl_3$ ); 85% ee, determined by HPLC analysis [Chiralpak AD, *n*-hexane/*i*-PrOH = 60/40, 1.0 mL/min,  $\lambda = 254$  nm,  $t$  (major) = 7.01 min,  $t$  (minor) = 8.03 min];  $^1H$  NMR (400 MHz,  $CDCl_3$ )  $\delta$  (ppm) 8.09 (d,  $J = 7.2$  Hz, 2H), 7.62–7.60 (m, 1H), 7.54–7.47 (m, 5H), 7.24–7.20 (m, 3H), 7.05 (d,  $J = 8.0$  Hz, 2H), 4.90 (d,  $J = 10.8$  Hz, 1H), 4.03 (d,  $J = 10.8$  Hz, 1H), 3.87 (s, 3H), 3.77 (s, 3H), 3.58 (s, 3H);  $^{13}C$  NMR (100 MHz,  $CDCl_3$ )  $\delta$  (ppm) 171.2, 169.8, 161.0, 152.3, 132.7, 132.1, 129.8, 128.7, 127.8, 127.6, 127.3, 124.1, 121.0, 120.9, 117.7, 115.9, 114.4, 108.8, 86.3, 83.5, 82.8, 79.9, 55.3, 53.3, 51.0, 27.7; ESI-HRMS: calcd. for  $C_{30}H_{24}N_2O_5+Na^+$  515.1577, found 515.1579.

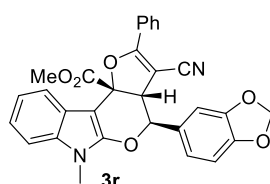

**3r**, 45.5 mg, 90% yield, white solid;  $[\alpha]_D^{20} = -146.9$  ( $c = 0.80$  in  $CHCl_3$ ); 97% ee, determined by HPLC analysis [Chiralpak OD, *n*-hexane/*i*-PrOH = 80/20, 1.0 mL/min,  $\lambda = 254$  nm,  $t$  (major) = 10.20 min,  $t$  (minor) = 12.32 min];  $^1H$  NMR (400 MHz,  $CDCl_3$ )  $\delta$  (ppm) 8.09 (d,  $J = 7.2$  Hz, 2H), 7.62–7.60 (m, 1H), 7.54–7.45 (m, 3H), 7.24–7.17 (m, 3H), 7.09–7.04 (m, 2H), 6.93 (d,  $J = 8.0$  Hz, 1H), 6.06 (s, 2H), 4.86 (d,  $J = 11.2$  Hz, 1H), 3.97 (d,  $J = 11.2$  Hz, 1H), 3.77 (s, 3H), 3.60 (s, 3H);  $^{13}C$  NMR (100 MHz,  $CDCl_3$ )  $\delta$  (ppm) 171.1, 169.9, 152.1, 149.1, 148.3, 132.7, 132.2, 128.9, 128.7, 127.8, 127.5, 124.0, 122.9, 121.1, 121.0, 117.7, 115.9, 108.9, 108.6, 108.1, 101.5, 86.2, 83.5, 83.0, 79.8, 53.3, 51.1, 27.8; ESI-HRMS: calcd. for  $C_{30}H_{22}N_2O_4+Na^+$  529.1370, found 529.1370.

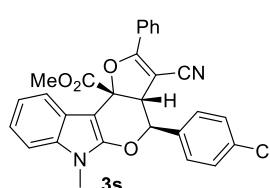

**3s**, 46.1 mg, 93% yield, white solid;  $[\alpha]_D^{20} = -171.8$  ( $c = 1.10$  in  $CHCl_3$ ); 94% ee, determined by HPLC analysis [Chiralpak AD, *n*-hexane/*i*-PrOH = 60/40, 1.0 mL/min,  $\lambda = 254$  nm,  $t$  (major) = 6.27 min,  $t$  (minor) = 7.38 min];  $^1H$  NMR (400 MHz,  $CDCl_3$ )  $\delta$  (ppm) 8.09 (d,  $J = 7.6$  Hz, 2H), 7.63–7.61 (m, 1H), 7.55–7.45 (m,

7H), 7.24–7.19 (m, 3H), 4.93 (d,  $J = 10.8$  Hz, 1H), 3.99 (d,  $J = 10.8$  Hz, 1H), 3.77 (s, 3H), 3.58 (s, 3H);  $^{13}\text{C}$  NMR (100 MHz,  $\text{CDCl}_3$ )  $\delta$  (ppm) 170.9, 170.1, 151.8, 136.1, 133.9, 132.7, 132.3, 129.7, 129.3, 128.7, 127.8, 127.4, 123.9, 121.2, 121.1, 117.8, 115.9, 108.9, 86.2, 83.6, 82.4, 79.4, 53.4, 50.9, 27.7; ESI-HRMS: calcd. for  $\text{C}_{29}\text{H}_{21}\text{ClN}_2\text{O}_4 + \text{Na}^+$  519.1082, found 519.1085.

Enantiomer of **3s**, 45.6 mg, 92% yield, white solid;  $[\alpha]_{\text{D}}^{20} = +170.6$  ( $c = 1.10$  in  $\text{CHCl}_3$ ); –92% ee, determined by HPLC analysis [Chiralpak AD,  $n$ -hexane/ $i$ -PrOH = 60/40, 1.0 mL/min,  $\lambda = 254$  nm,  $t$  (minor) = 6.28 min,  $t$  (major) = 7.31 min.

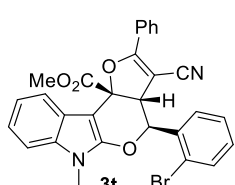

**3t**, 51.8 mg, 96% yield, white solid;  $[\alpha]_{\text{D}}^{20} = -117.1$  ( $c = 1.00$  in  $\text{CHCl}_3$ ); 98% ee, determined by HPLC analysis [Chiralpak OD,  $n$ -hexane/ $i$ -PrOH = 90/10, 1.0 mL/min,  $\lambda = 254$  nm,  $t$  (major) = 20.86 min,  $t$  (minor) = 17.44 min];  $^1\text{H}$  NMR (400 MHz,  $\text{CDCl}_3$ )  $\delta$  (ppm) 8.10 (d,  $J = 6.8$  Hz, 2H), 7.76–7.73 (m, 2H), 7.64–7.62 (m, 1H), 7.54–7.46 (m, 4H), 7.38 (t,  $J = 7.6$  Hz, 1H), 7.26–7.19 (m, 3H), 5.68 (d,  $J = 10.8$  Hz, 1H), 4.02 (d,  $J = 10.8$  Hz, 1H), 3.78 (s, 3H), 3.61 (s, 3H);  $^{13}\text{C}$  NMR (100 MHz,  $\text{CDCl}_3$ )  $\delta$  (ppm) 171.0, 170.3, 152.0, 135.1, 133.4, 132.7, 132.2, 131.3, 129.5, 128.7, 128.2, 128.0, 127.5, 124.7, 123.9, 121.2, 121.1, 117.8, 115.8, 108.9, 86.2, 83.7, 80.5, 79.2, 53.4, 51.5, 27.8; ESI-HRMS: calcd. for  $\text{C}_{29}\text{H}_{21}\text{BrN}_2\text{O}_4 + \text{H}^+$  541.0757 ( $^{79}\text{Br}$ ), 543.0737 ( $^{81}\text{Br}$ ), found 541.0760, 543.0748.

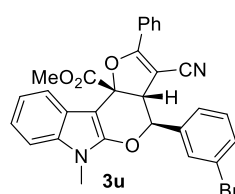

**3u**, 50.2 mg, 93% yield, white solid;  $[\alpha]_{\text{D}}^{20} = -161.3$  ( $c = 1.00$  in  $\text{CHCl}_3$ ); 94% ee, determined by HPLC analysis [Chiralpak OD,  $n$ -hexane/ $i$ -PrOH = 80/20, 1.0 mL/min,  $\lambda = 254$  nm,  $t$  (major) = 9.61 min,  $t$  (minor) = 15.56 min];  $^1\text{H}$  NMR (400 MHz,  $\text{CDCl}_3$ )  $\delta$  (ppm) 8.10 (d,  $J = 7.6$  Hz, 2H), 7.78 (s, 1H), 7.67–7.61 (m, 2H), 7.53–7.46 (m, 4H), 7.40 (t,  $J = 8.0$  Hz, 1H), 7.25–7.20 (m, 2H), 4.92 (d,  $J = 10.8$  Hz, 1H), 3.98 (d,  $J = 10.8$  Hz, 1H), 3.77 (s, 3H), 3.61 (s, 3H);  $^{13}\text{C}$  NMR (100 MHz,  $\text{CDCl}_3$ )  $\delta$  (ppm) 170.9, 170.1, 151.7, 137.6, 133.3, 132.7, 132.3, 131.2, 130.5, 128.8, 127.9, 127.4, 127.1, 123.9, 123.1, 121.18, 121.15, 117.8, 115.8, 108.9, 86.1, 83.6, 82.3, 79.3, 53.4, 51.1, 27.8; ESI-HRMS: calcd. for  $\text{C}_{29}\text{H}_{21}\text{BrN}_2\text{O}_4 + \text{H}^+$  541.0757 found 541.0757.

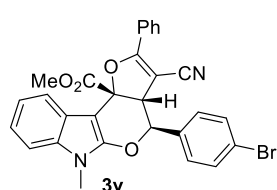

**3v**, 49.6 mg, 92% yield, white solid;  $[\alpha]_{\text{D}}^{20} = -158.9$  ( $c = 1.35$  in  $\text{CHCl}_3$ ); 92% ee, determined by HPLC analysis [Chiralpak AD,  $n$ -hexane/ $i$ -PrOH = 60/40, 1.0 mL/min,  $\lambda = 254$  nm,  $t$  (major) = 5.61 min,  $t$  (minor) = 6.60 min];  $^1\text{H}$  NMR (400 MHz,  $\text{CDCl}_3$ )  $\delta$  (ppm) 8.09 (d,  $J = 7.6$  Hz, 2H), 7.67 (d,  $J = 8.0$  Hz, 2H), 7.62 (d,  $J = 4.8$  Hz, 1H), 7.52–7.45 (m, 5H), 7.25–7.19 (m, 3H), 4.92 (d,  $J = 10.8$  Hz, 1H), 3.99 (d,  $J = 10.8$  Hz, 1H), 3.77 (s, 3H), 3.59 (s, 3H);  $^{13}\text{C}$  NMR (100 MHz,  $\text{CDCl}_3$ )  $\delta$  (ppm) 170.9, 170.1, 151.8, 134.4, 132.7, 132.3, 132.2, 130.0, 128.8, 127.8, 127.4, 124.4, 123.9, 121.2, 121.1, 117.8, 115.9, 108.9, 86.2, 83.6, 82.4, 79.3, 53.4, 50.9, 27.8; ESI-HRMS: calcd. for  $\text{C}_{29}\text{H}_{21}\text{BrN}_2\text{O}_4 + \text{H}^+$  541.0757, found 541.0760.

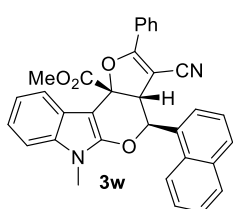

**3w**, 49.1 mg, 96% yield, white solid;  $[\alpha]_D^{20} = -156.0$  ( $c = 1.25$  in  $\text{CHCl}_3$ ); 94% ee, determined by HPLC analysis [Chiralpak AD, *n*-hexane/*i*-PrOH = 90/10, 1.0 mL/min,  $\lambda = 254$  nm,  $t$  (major) = 19.51 min,  $t$  (minor) = 17.41 min];  $^1\text{H NMR}$  (400 MHz,  $\text{CDCl}_3$ )  $\delta$  (ppm) 8.19 (s, 1H), 8.03 (d,  $J = 7.6$  Hz, 3H), 7.99–7.97 (m, 1H), 7.83 (d,  $J = 6.4$  Hz, 1H), 7.67–7.61 (m, 2H), 7.57–7.55 (m, 2H), 7.50–7.43 (m, 3H), 7.26–7.21 (m, 3H), 5.71 (d,  $J = 9.6$  Hz, 1H), 4.41 (d,  $J = 10.8$  Hz, 1H), 3.79 (s, 3H), 3.60 (s, 3H);  $^{13}\text{C NMR}$  (100 MHz,  $\text{CDCl}_3$ )  $\delta$  (ppm) 171.1, 169.9, 152.1, 134.2, 132.8, 132.2, 131.5, 130.9, 130.7, 129.4, 128.7, 127.9, 127.5, 126.8, 126.0, 125.2, 124.1, 123.2, 121.2, 121.1, 117.7, 115.7, 108.9, 86.4, 83.7, 80.2, 53.4, 50.4, 27.8; ESI-HRMS: calcd. for  $\text{C}_{33}\text{H}_{24}\text{N}_2\text{O}_4 + \text{Na}^+$  535.1628, found 535.1627.

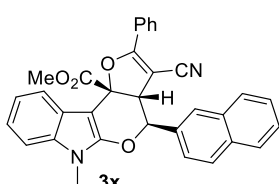

**3x**, 48.6 mg, 95% yield, white solid;  $[\alpha]_D^{20} = -167.9$  ( $c = 0.90$  in  $\text{CHCl}_3$ ); 99% ee, determined by HPLC analysis [Chiralpak AD, *n*-hexane/*i*-PrOH = 60/40, 1.0 mL/min,  $\lambda = 254$  nm,  $t$  (major) = 6.84 min,  $t$  (minor) = 22.18 min];  $^1\text{H NMR}$  (400 MHz,  $\text{CDCl}_3$ )  $\delta$  (ppm) 8.14 (d,  $J = 7.2$  Hz, 2H), 8.07 (s, 1H), 8.05 (d,  $J = 8.4$  Hz, 1H), 7.98–7.93 (m, 2H), 7.75 (d,  $J = 8.4$  Hz, 1H), 7.69–7.67 (m, 1H), 7.59–7.56 (m, 2H), 7.54–7.47 (m, 3H), 7.26–7.23 (m, 3H), 5.15 (d,  $J = 10.8$  Hz, 1H), 4.20 (d,  $J = 10.8$  Hz, 1H), 3.81 (s, 3H), 3.61 (s, 3H);  $^{13}\text{C NMR}$  (100 MHz,  $\text{CDCl}_3$ )  $\delta$  (ppm) 171.1, 169.9, 152.1, 134.1, 133.1, 132.7, 132.5, 132.2, 129.1, 128.73, 128.71, 128.3, 128.0, 127.8, 127.5, 127.0, 126.7, 124.7, 124.0, 121.1, 121.0, 117.8, 115.8, 108.9, 86.2, 83.6, 83.3, 79.8, 53.3, 50.8, 27.8; ESI-HRMS: calcd. for  $\text{C}_{33}\text{H}_{24}\text{N}_2\text{O}_4 + \text{Na}^+$  535.1628, found 535.1631.

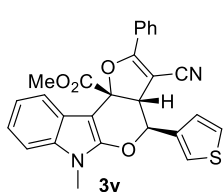

**3y**, 42.1 mg, 90% yield, yellow solid;  $[\alpha]_D^{20} = -293.2$  ( $c = 1.50$  in  $\text{CHCl}_3$ ); 95% ee, determined by HPLC analysis [Chiralpak AD, *n*-hexane/*i*-PrOH = 60/40, 1.0 mL/min,  $\lambda = 254$  nm,  $t$  (major) = 6.87 min,  $t$  (minor) = 9.02 min];  $^1\text{H NMR}$  (400 MHz,  $\text{CDCl}_3$ )  $\delta$  (ppm) 8.09 (d,  $J = 7.2$  Hz, 2H), 7.62–7.59 (m, 2H), 7.53–7.49 (m, 2H), 7.48–7.44 (m, 2H), 7.37 (d,  $J = 4.8$  Hz, 1H), 7.23–7.18 (m, 3H), 5.08 (d,  $J = 10.8$  Hz, 1H), 4.04 (d,  $J = 10.8$  Hz, 1H), 3.77 (s, 3H), 3.60 (s, 3H);  $^{13}\text{C NMR}$  (150 MHz,  $\text{CDCl}_3$ )  $\delta$  (ppm) 171.0, 169.7, 151.9, 136.2, 132.7, 132.2, 128.7, 127.8, 127.5, 126.6, 126.3, 124.0, 121.1, 121.0, 117.8, 115.8, 108.8, 86.1, 83.6, 79.8, 78.3, 53.3, 50.9, 27.8; ESI-HRMS: calcd. for  $\text{C}_{27}\text{H}_{20}\text{N}_2\text{O}_4\text{S} + \text{Na}^+$  491.1036, found 491.1045.

## 7. General procedure for asymmetric [3 + 2] annulations

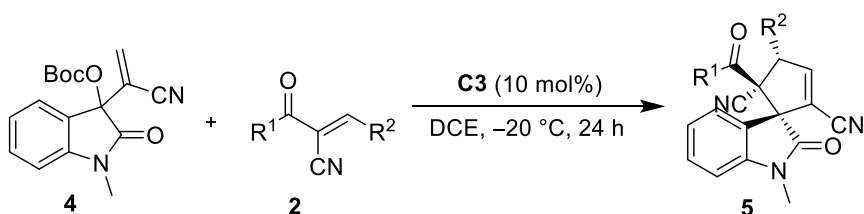

The Morita-Baylis-Hillman carbonate **4** (0.1 mmol),  $\alpha$ -cyano- $\alpha,\beta$ -unsaturated ketone **2** (0.1 mmol), and catalyst **C3** (2.9 mg, 0.01 mmol) were dissolved in 1,2-dichloroethane (DCE, 1.0 mL). Then the solution was

stirred at  $-20\text{ }^{\circ}\text{C}$  for 24 h. After completion, the mixture was directly purified by column chromatography on silica gel eluting with petroleum ether/ethyl acetate (5:1 to 3:1) to afford the product **5**.

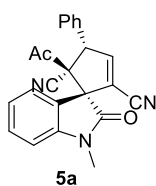

**5a**, 34.1 mg, 93% yield, white solid;  $[\alpha]_{\text{D}}^{20} = -261.3$  ( $c = 1.10$  in  $\text{CHCl}_3$ ); 92% ee, determined by HPLC analysis [Chiralpak AD,  $n$ -hexane/ $i$ -PrOH = 60/40, 1.0 mL/min,  $\lambda = 254$  nm,  $t$  (major) = 15.92 min,  $t$  (minor) = 23.67 min];  $^1\text{H}$  NMR (400 MHz,  $\text{CDCl}_3$ )  $\delta$  (ppm) 7.47–7.42 (m, 6H), 7.13 (t,  $J = 8.0$  Hz, 1H), 7.05 (d,  $J = 2.0$  Hz, 1H), 6.97 (d,  $J = 8.0$  Hz, 2H), 5.45 (d,  $J = 2.0$  Hz, 1H), 3.37 (s, 3H), 1.82 (s, 3H);  $^{13}\text{C}$  NMR (100 MHz,  $\text{CDCl}_3$ )  $\delta$  (ppm) 195.6, 171.3, 151.7, 143.8, 135.2, 131.7, 129.6, 129.2, 129.0, 126.3, 123.9, 122.2, 115.2, 115.0, 112.3, 109.5, 67.3, 65.8, 55.4, 27.8, 27.3; ESI-HRMS: calcd. for  $\text{C}_{23}\text{H}_{17}\text{N}_3\text{O}_2 + \text{Na}^+$  390.1213, found 390.1214.

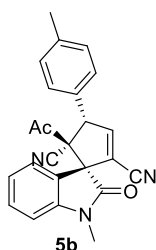

**5b**, 35.1 mg, 92% yield, white solid;  $[\alpha]_{\text{D}}^{20} = -189.4$  ( $c = 1.25$  in  $\text{CHCl}_3$ ); 92% ee, determined by HPLC analysis [Chiralpak IE,  $n$ -hexane/ $i$ -PrOH = 60/40, 1.0 mL/min,  $\lambda = 254$  nm,  $t$  (major) = 32.49 min,  $t$  (minor) = 20.35 min];  $^1\text{H}$  NMR (400 MHz,  $\text{CDCl}_3$ )  $\delta$  (ppm) 7.45 (t,  $J = 8.0$  Hz, 1H), 7.30 (d,  $J = 8.0$  Hz, 2H), 7.23 (d,  $J = 8.0$  Hz, 2H), 7.13 (t,  $J = 8.0$  Hz, 1H), 7.04 (d,  $J = 2.4$  Hz, 1H), 6.96 (d,  $J = 8.0$  Hz, 2H), 5.40 (d,  $J = 2.0$  Hz, 1H), 3.37 (s, 3H), 2.36 (s, 3H), 1.82 (s, 3H);  $^{13}\text{C}$  NMR (150 MHz,  $\text{CDCl}_3$ )  $\delta$  (ppm) 195.6, 171.3, 151.9, 143.8, 139.0, 132.0, 131.6, 129.7, 129.3, 126.2, 123.8, 122.1, 115.1, 114.9, 112.3, 109.4, 67.3, 65.8, 55.1, 27.9, 27.3, 21.2; ESI HRMS: calcd. for  $\text{C}_{24}\text{H}_{19}\text{N}_3\text{O}_2 + \text{Na}^+$  404.1369, found 404.1372.

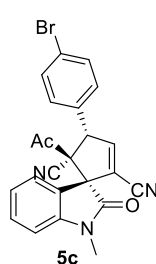

**5c**, 42.3 mg, 95% yield, white solid;  $[\alpha]_{\text{D}}^{20} = -248.3$  ( $c = 1.40$  in  $\text{CHCl}_3$ ); >99% ee, determined by HPLC analysis [Chiralpak IF,  $n$ -hexane/ $i$ -PrOH = 60/40, 1.0 mL/min,  $\lambda = 254$  nm,  $t$  (major) = 14.67 min,  $t$  (minor) = 40.31 min];  $^1\text{H}$  NMR (400 MHz,  $\text{CDCl}_3$ )  $\delta$  (ppm) 7.55 (d,  $J = 8.4$  Hz, 2H), 7.46 (t,  $J = 7.6$  Hz, 1H), 7.31 (d,  $J = 8.0$  Hz, 2H), 7.13 (t,  $J = 7.6$  Hz, 1H), 7.00 (d,  $J = 2.4$  Hz, 1H), 6.98 (d,  $J = 8.8$  Hz, 1H), 6.95 (d,  $J = 7.6$  Hz, 1H), 5.38 (d,  $J = 2.0$  Hz, 1H), 3.37 (s, 3H), 1.83 (s, 3H);  $^{13}\text{C}$  NMR (150 MHz,  $\text{CDCl}_3$ )  $\delta$  (ppm) 195.5, 171.2, 150.8, 143.8, 134.1, 132.1, 131.8, 131.2, 126.1, 123.9, 123.5, 121.8, 115.6, 114.9, 112.0, 109.5, 66.8, 65.8, 54.9, 27.9, 27.3; ESI HRMS: calcd. for  $\text{C}_{23}\text{H}_{16}\text{BrN}_3\text{O}_2 + \text{Na}^+$  468.0318, found 468.0321.

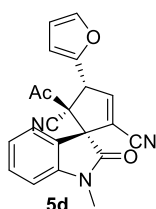

**5d**, 32.1 mg, 90% yield, white solid;  $[\alpha]_{\text{D}}^{20} = -130.5$  ( $c = 0.9$  in  $\text{CHCl}_3$ ); 98% ee, determined by HPLC analysis [Chiralpak IF,  $n$ -hexane/ $i$ -PrOH = 60/40, 1.0 mL/min,  $\lambda = 254$  nm,  $t$  (major) = 15.78 min,  $t$  (minor) = 28.96 min];  $^1\text{H}$  NMR (400 MHz,  $\text{CDCl}_3$ )  $\delta$  (ppm) 7.49–7.45 (m, 2H), 7.11 (t,  $J = 7.6$  Hz, 1H), 7.05 (d,  $J = 7.6$  Hz, 1H), 7.00 (d,  $J = 8.0$  Hz, 1H), 6.68 (d,  $J = 3.2$  Hz, 1H), 6.47–6.44 (m, 2H), 4.43 (d,  $J = 1.6$  Hz, 1H), 3.34 (s, 3H), 2.32 (s, 3H);  $^{13}\text{C}$  NMR (150 MHz,  $\text{CDCl}_3$ )  $\delta$  (ppm) 198.1, 172.3, 146.1, 144.9, 144.0, 132.2, 131.5, 125.0, 123.5, 123.2, 120.4, 117.0, 115.7, 111.9, 110.1, 109.6, 63.6, 62.5, 42.1, 30.5, 26.9; ESI HRMS: calcd. for  $\text{C}_{21}\text{H}_{15}\text{N}_3\text{O}_3 + \text{Na}^+$  380.1006, found 380.1008.

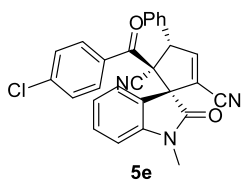

**5e**, 43.1 mg, 93% yield, white solid;  $[\alpha]_D^{20} = -221.2$  ( $c = 1.30$  in  $\text{CHCl}_3$ ); 97% ee, determined by HPLC analysis [Chiralpak AD,  $n$ -hexane/ $i$ -PrOH = 60/40, 1.0 mL/min,  $\lambda = 254$  nm,  $t$  (major) = 25.36 min,  $t$  (minor) = 29.50 min];  $^1\text{H}$  NMR (400 MHz,  $\text{CDCl}_3$ )  $\delta$  (ppm) 7.56–7.52 (m, 4H), 7.45–7.38 (m, 3H), 7.23–7.19 (m, 1H), 7.16 (d,  $J = 8.4$  Hz, 2H), 7.12 (d,  $J = 2.0$  Hz, 1H), 7.04–6.99 (m, 2H), 6.44 (d,  $J = 8.0$  Hz, 1H), 5.86 (d,  $J = 1.6$  Hz, 1H), 3.06 (s, 3H);  $^{13}\text{C}$  NMR (100 MHz,  $\text{CDCl}_3$ )  $\delta$  (ppm) 186.6, 170.5, 150.9, 143.0, 140.6, 135.0, 132.4, 131.3, 129.9, 129.6, 129.1, 128.8, 128.3, 125.2, 123.5, 122.6, 115.9, 113.7, 112.2, 108.7, 66.4, 64.6, 55.8, 26.8; ESI HRMS: calcd. for  $\text{C}_{28}\text{H}_{18}\text{ClN}_3\text{O}_2 + \text{Na}^+$  486.0980, found 486.0983.

## 8. Crystal data and structural refinement for enantiopure 3t and 5a

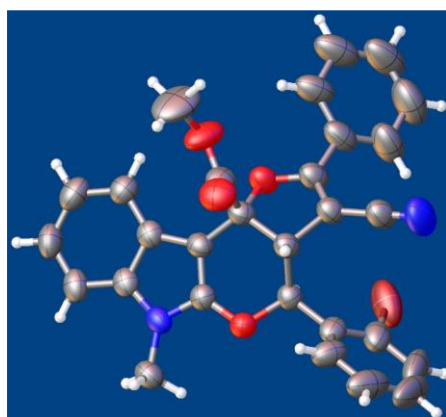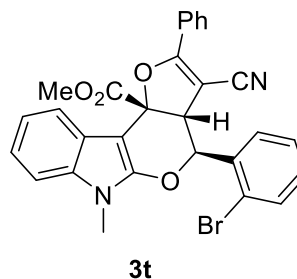

|                        |                                                    |
|------------------------|----------------------------------------------------|
| Identification code    | <b>3t</b>                                          |
| Empirical formula      | $\text{C}_{29}\text{H}_{21}\text{BrN}_2\text{O}_4$ |
| Formula weight         | 541.39                                             |
| Temperature/K          | 292.4(3)                                           |
| Crystal system         | orthorhombic                                       |
| Space group            | $P2_12_12_1$                                       |
| $a/\text{\AA}$         | 7.08473(14)                                        |
| $b/\text{\AA}$         | 16.7619(4)                                         |
| $c/\text{\AA}$         | 22.0850(6)                                         |
| $\alpha/^\circ$        | 90                                                 |
| $\beta/^\circ$         | 90                                                 |
| $\gamma/^\circ$        | 90                                                 |
| Volume/ $\text{\AA}^3$ | 2622.68(10)                                        |



|                                                |                                                               |
|------------------------------------------------|---------------------------------------------------------------|
| Z                                              | 4                                                             |
| $\rho_{\text{calc}}/\text{cm}^3$               | 1.371                                                         |
| $\mu/\text{mm}^{-1}$                           | 2.438                                                         |
| F(000)                                         | 1104.0                                                        |
| Crystal size/ $\text{mm}^3$                    | $0.8 \times 0.7 \times 0.3$                                   |
| Radiation                                      | $\text{CuK}\alpha$ ( $\lambda = 1.54184$ )                    |
| $2\Theta$ range for data collection/ $^\circ$  | 10.556 to 144.988                                             |
| Index ranges                                   | $-5 \leq h \leq 8, -19 \leq k \leq 20, -27 \leq l \leq 25$    |
| Reflections collected                          | 14476                                                         |
| Independent reflections                        | 5097 [ $R_{\text{int}} = 0.0440, R_{\text{sigma}} = 0.0321$ ] |
| Data/restraints/parameters                     | 5097/0/327                                                    |
| Goodness-of-fit on $F^2$                       | 1.038                                                         |
| Final R indexes [ $I \geq 2\sigma(I)$ ]        | $R_1 = 0.0783, wR_2 = 0.2136$                                 |
| Final R indexes [all data]                     | $R_1 = 0.0825, wR_2 = 0.2211$                                 |
| Largest diff. peak/hole / $e \text{ \AA}^{-3}$ | 0.82/-1.36                                                    |
| Flack parameter                                | -0.044(14)                                                    |

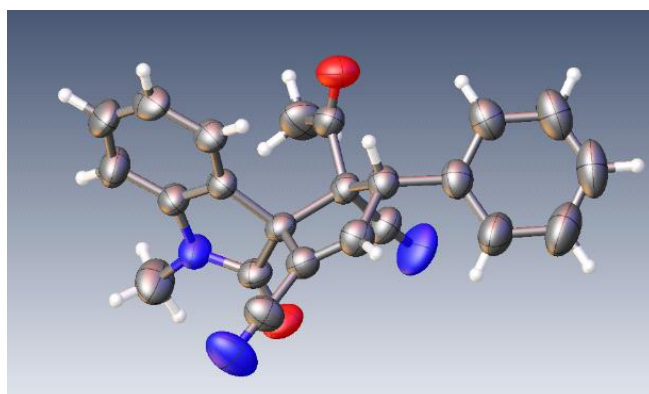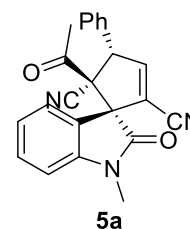

|                     |                                                  |
|---------------------|--------------------------------------------------|
| Identification code | <b>5a</b>                                        |
| Empirical formula   | $\text{C}_{23}\text{H}_{17}\text{N}_3\text{O}_2$ |
| Formula weight      | 367.39                                           |
| Temperature/K       | 292.6(5)                                         |
| Crystal system      | orthorhombic                                     |
| Space group         | $P2_12_12_1$                                     |
| $a/\text{\AA}$      | 10.06732(18)                                     |

|                                                |                                                               |
|------------------------------------------------|---------------------------------------------------------------|
| b/Å                                            | 10.59058(14)                                                  |
| c/Å                                            | 22.9703(4)                                                    |
| $\alpha/^\circ$                                | 90                                                            |
| $\beta/^\circ$                                 | 90                                                            |
| $\gamma/^\circ$                                | 90                                                            |
| Volume/Å <sup>3</sup>                          | 2449.06(7)                                                    |
| Z                                              | 4                                                             |
| $\rho_{\text{calc}}/\text{cm}^3$               | 0.996                                                         |
| $\mu/\text{mm}^{-1}$                           | 0.524                                                         |
| F(000)                                         | 768.0                                                         |
| Crystal size/mm <sup>3</sup>                   | 0.7 × 0.3 × 0.2                                               |
| Radiation                                      | CuK $\alpha$ ( $\lambda = 1.54184$ )                          |
| 2 $\Theta$ range for data collection/ $^\circ$ | 9.196 to 145.212                                              |
| Index ranges                                   | -12 ≤ h ≤ 11, -13 ≤ k ≤ 8, -28 ≤ l ≤ 20                       |
| Reflections collected                          | 13639                                                         |
| Independent reflections                        | 4769 [R <sub>int</sub> = 0.0309, R <sub>sigma</sub> = 0.0272] |
| Data/restraints/parameters                     | 4769/14/255                                                   |
| Goodness-of-fit on F <sup>2</sup>              | 1.032                                                         |
| Final R indexes [ $I \geq 2\sigma(I)$ ]        | R <sub>1</sub> = 0.0439, wR <sub>2</sub> = 0.1225             |
| Final R indexes [all data]                     | R <sub>1</sub> = 0.0463, wR <sub>2</sub> = 0.1268             |
| Largest diff. peak/hole / e Å <sup>-3</sup>    | 0.14/-0.22                                                    |
| Flack parameter                                | -0.03(14)                                                     |

## 9. DFT computational calculation studies

### Computational method:

All calculations were carried out with the GAUSSIAN 09 packages.<sup>4</sup> The recently developed M06-2x functional,<sup>5</sup> together with the standard 6-31G(d) basis set, were used for optimizing the geometry of all the minima and transition states. All the optimized structures were confirmed by frequency calculations to be either minima or transition states using the same level of theory. For transition states, intrinsic reaction coordinate analysis (IRC) was done to verify that they connect



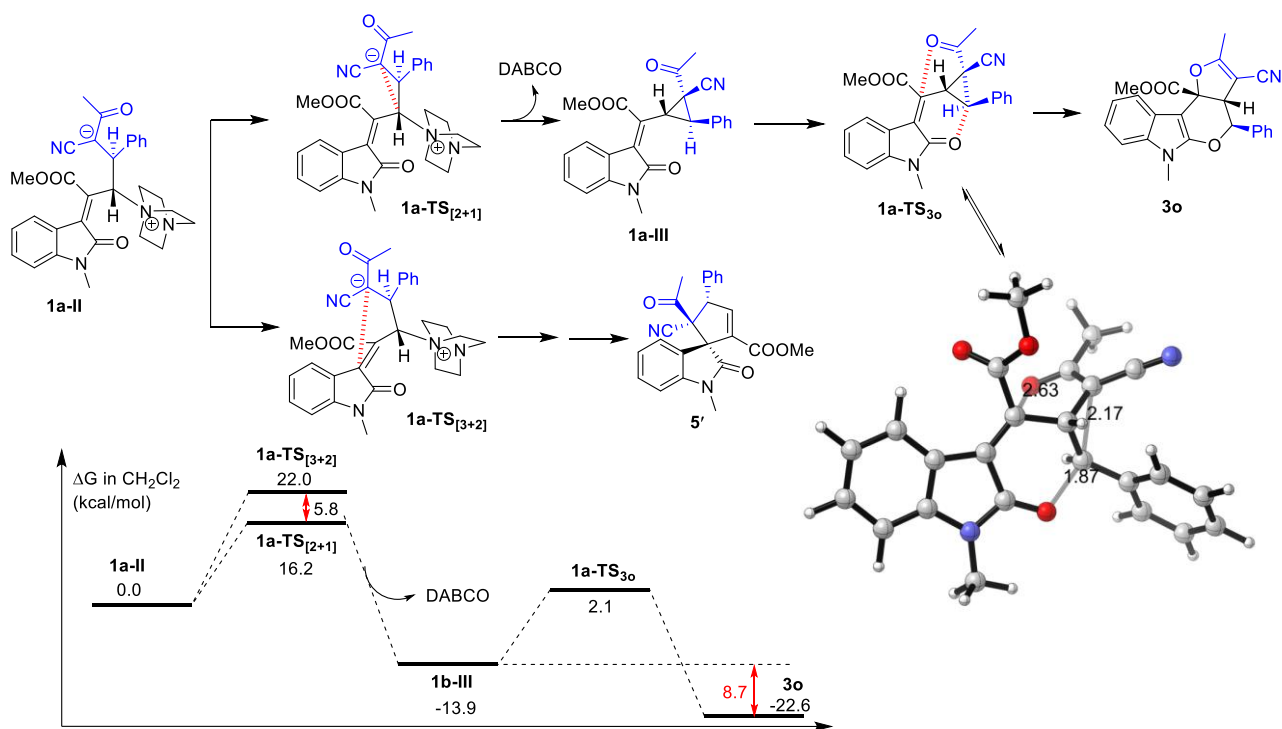

**Scheme 2.** Computed potential energy surface of the formation of **3o** and **5'**.

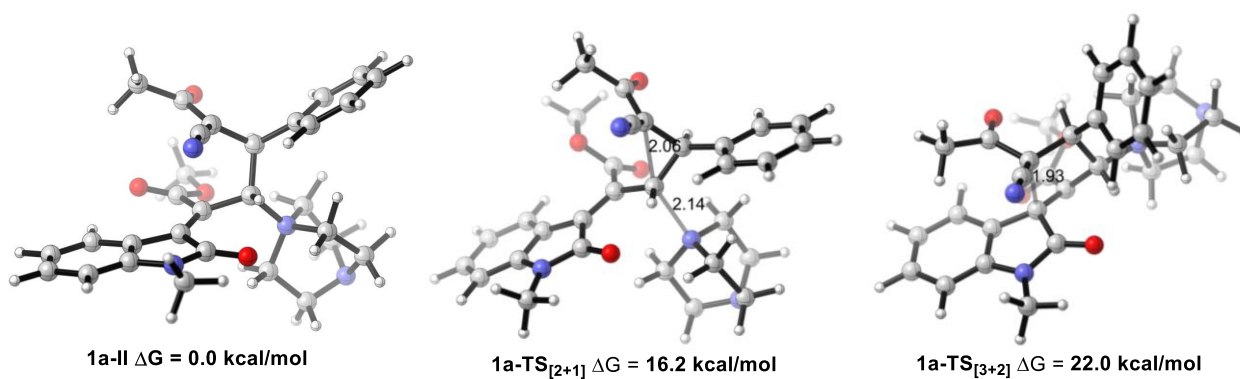

**Scheme 3.** Key transition states and related energy for the reaction of **1a** and **2b**.

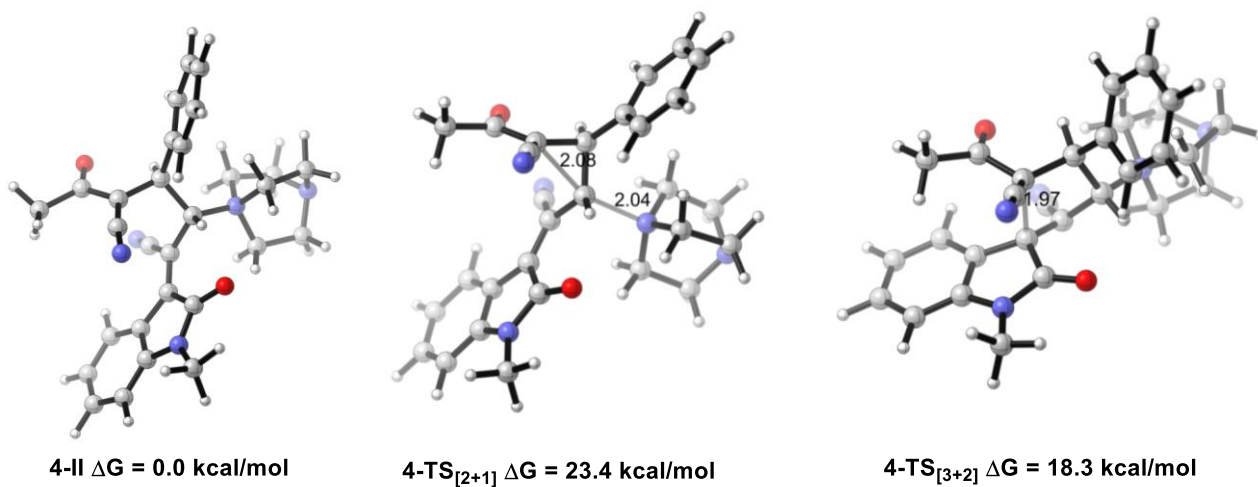

**Scheme 4.** Key transition states and related energy for the reaction of **4** and **2b**.

Density functional theory (DFT) computational calculations were performed to clarify the mechanism of the formation of dihydropyrano[2,3-*b*]indole architectures and the selectivity for different substrates. These geometries of intermediates and transition states (TSs) were optimized using M062X functional together with the standard 6-31G(d) basis set, and the energies were calculated at 6-311+G(2d,p) level (CH<sub>2</sub>Cl<sub>2</sub> as solvent). As our previous calculation,<sup>9</sup> the ring-closure steps were considered as the decisive processes for formation of five-membered ring product by a sequential Michael addition via **TS**<sub>[3+2]</sub> and three-membered ring intermediate by a S<sub>N</sub>2 process via **TS**<sub>[2+1]</sub> (Scheme 1). For the reaction of the substrates **1a** with an electron-withdrawing group COOMe, and alkene **2b** catalyzed by DABCO, the energy barrier of **1a-TS**<sub>[2+1]</sub> was 5.8 kcal/mol lower than that of **1a-TS**<sub>[3+2]</sub>, indicating that the [3+2] process was unfavorable (Schemes 2 and 3). Actually, [3+2] product **5'** wasn't found in our experiment. Due to the strong electron withdrawing ability of cyano and acetyl groups at the cyclopropane ring of **1a-III**, the lone pair electrons at O1 atom would attack the benzylic position and the ring would be opened. The O2 atom would accept the electron from the C-C bond breaking, and add to the double bond by Michael addition to generate product **3o**. The transition state **1a-TS**<sub>3o</sub> for this rearrangement was calculated with energy barrier of 16.0 kcal/mol, suggesting a potentially concerted mechanism leading to the high diastereocontrol in the observed product **3o**. The energy difference of the intermediate **1a-III** and dihydropyrano[2,3-*b*]indole product **3o** was 8.7 kcal/mol, suggesting the **1a-III** may be converted directly to the thermodynamically stable product **3o** (Scheme 2).

In contrast, the reaction of **4** with a cyano group and alkene **2** produced [3+2] spiro compound **5a**. The calculated energy barrier of **4-TS**<sub>[2+1]</sub> was 5.1 kcal/mol higher than **4-TS**<sub>[3+2]</sub>, indicating that the [3+2] process was favorable and the theoretical result is consistent with the experimental data (Scheme 4).

To further analyze the selectivity, the natural population analysis (NPA) charge evaluation towards the reactants was conducted. The NPA charge values of **1a-II** and **4-II** showed that the electrophilicity of C1 in **1a-II** was much weaker than that of C4 in **4-II** due to the higher negative charge, which suggested that a nucleophilic carbon anion would be easier to add to C4 atom. Moreover, the nucleophilicity of C2 is slightly stronger than that of C5. In addition, the distance of C3-N1 bond with value of 1.57 Å was a little longer than that of C6-N2 bond (1.55 Å), suggesting that DABCO in **1a-II** is easier to leave than that in **4-II** via a S<sub>N</sub>2 reaction. Therefore, the introduction of a stronger electron-withdrawing group at C=C bond facilitated the Michael addition process, resulting in the completely switchable regioselectivity.

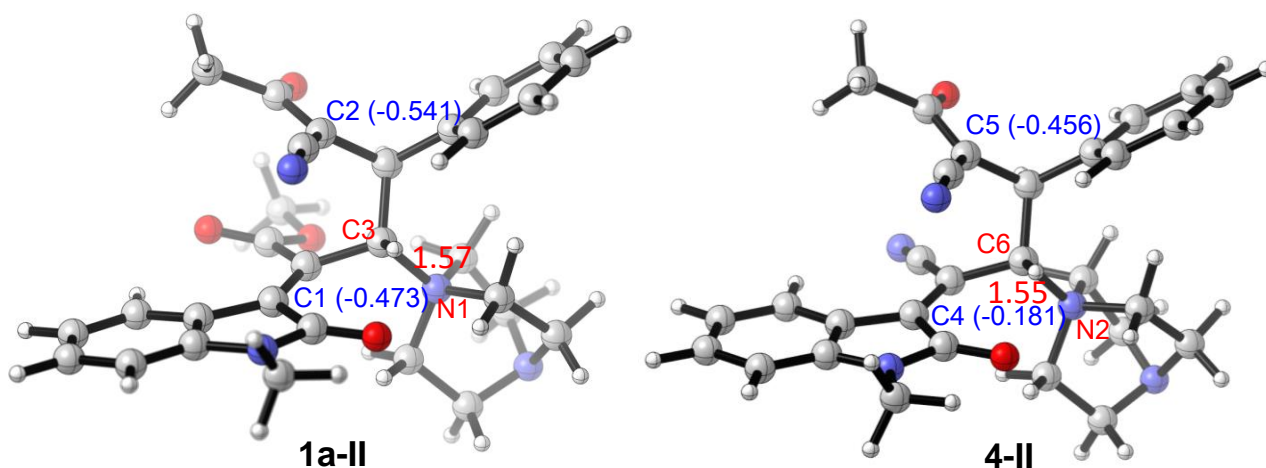

**Scheme 5.** Optimized structure of **1a-II** and **4-II**. The values in parentheses are corresponding NPA charge of certain atoms. The numbers in red were the distances between C-N bonds in Å.

(4) M. J. Frisch, G. W. Trucks, H. B. Schlegel, G. E. Scuseria, M. A. Robb, J. R. Cheeseman, G. Scalmani, V. Barone, B. Mennucci, G. A. Petersson, H. Nakatsuji, M. Caricato, X. Li, H. P. Hratchian, A. F. Izmaylov, J. Bloino, G. Zheng, J. L. Sonnenberg, M. Hada, M. Ehara, K. Toyota, R. Fukuda, J. Hasegawa, M. Ishida, T. Nakajima, Y. Honda, O. Kitao, H. Nakai, T. Vreven, J. A. Montgomery Jr., J. E. Peralta, F. Ogliaro, M. J. Bearpark, J. Heyd, E. N. Brothers, K. N. Kudin, V. N. Staroverov, R. Kobayashi, J. Normand, K. Raghavachari, A. P. Rendell, J. C. Burant, S. S. Iyengar, J. Tomasi, M. Cossi, N. Rega, N. J. Millam, M. Klene, J. E. Knox, J. B. Cross, V. Bakken, C. Adamo, J. Jaramillo, R. Gomperts, R. E. Stratmann, O. Yazyev, A. J. Austin, R. Cammi, C. Pomelli, J. W. Ochterski, R. L. Martin, K. Morokuma, V. G. Zakrzewski, G. A. Voth, P. Salvador, J. J. Dannenberg, S. Dapprich, A. D. Daniels, Ö. Farkas, J. B. Foresman, J. V. Ortiz, J. Cioslowski, D. J. Fox, Gaussian 09, Gaussian, Inc.: Wallingford, CT, USA, 2009.

(5) (a) Y. Zhao, N. E. Schultz and D. Truhlar, *J. Chem. Phys.*, 2005, **123**, 161103; (b) Y. Zhao, N. E. Schultz and D. G. Truhlar, *J. Chem. Theory. Comput.*, 2006, **2**, 364; (c) Y. Zhao and D. G. Truhlar, *J. Chem. Theory. Comput.*, 2006, **2**, 1009; (d) Y. Zhao and D. G. Truhlar, *Acc. Chem. Res.*, 2008, **41**, 157; (e) Y. Zhao and D. G. Truhlar, *Theor. Chem. Acc.*, 2008, **120**, 215; (f) Y. Zhao and D. G. Truhlar, *Chem. Phys. Lett.*, 2011, **502**, 1.

(6) K. Fukui, *Acc. Chem. Res.*, 1981, **14**, 363.

(7) J. M. Um, D. A. DiRocco, E. L. Noey, T. Rovis and K. Houk, *J. Am. Chem. Soc.*, 2011, **133**, 11249.

(8) (a) A. V. Marenich, C. J. Cramer and D. G. Truhlar, *J. Phys. Chem. B*, 2009, **113**, 6378; (b) R. F. Ribeiro, A. V. Marenich, C. J. Cramer and D. G. Truhlar, *J. Phys. Chem. B*, 2011, **115**, 14556.

(9) G. Zhan, M.-L. Shi, Q. He, W.-J. Lin, Q. Ouyang, W. Du and Y.-C. Chen, *Angew. Chem., Int. Ed.*, 2016, **55**, 2147.

## Computational data:

### 1a-II

Zero-point correction= 0.588938 (Hartree/Particle)

Thermal correction to Energy= 0.622199

Thermal correction to Enthalpy= 0.623143

Thermal correction to Gibbs Free Energy= 0.525358

SCF Done: E(SOV) = -1682.21857759 A.U.

-----  
Center Atomic Atomic Coordinates (Angstroms)

Number Number Type X Y Z

-----  
1 6 0 -5.484287 -0.377648 0.913060  
2 6 0 -6.058917 0.217630 -0.205069  
3 6 0 -5.264926 0.886448 -1.136842  
4 6 0 -3.901423 0.924964 -0.905625  
5 6 0 -3.282134 0.305440 0.201978  
6 6 0 -4.104004 -0.345421 1.121942  
7 7 0 -2.954876 1.591590 -1.680324  
8 6 0 -1.711208 1.474152 -1.136091  
9 6 0 -1.828293 0.535606 0.051591  
10 8 0 -0.733103 2.110031 -1.522350  
11 6 0 -3.237779 2.332573 -2.884272  
12 6 0 0.664804 0.205343 0.032788  
13 6 0 -0.722680 0.016744 0.657317  
14 6 0 -0.834986 -0.880146 1.848151  
15 8 0 -1.771216 -1.579487 2.145353

|    |   |   |           |           |           |
|----|---|---|-----------|-----------|-----------|
| 16 | 8 | 0 | 0.258580  | -0.783921 | 2.631905  |
| 17 | 6 | 0 | 0.290389  | -1.711177 | 3.730743  |
| 18 | 6 | 0 | 0.234152  | -2.110150 | -0.494330 |
| 19 | 6 | 0 | 1.358069  | -1.164290 | -0.118728 |
| 20 | 1 | 0 | -6.113283 | -0.887717 | 1.635141  |
| 21 | 1 | 0 | -7.132769 | 0.167167  | -0.356482 |
| 22 | 1 | 0 | -5.697980 | 1.360920  | -2.011287 |
| 23 | 1 | 0 | -3.684564 | -0.831041 | 1.988733  |
| 24 | 1 | 0 | -3.955149 | 3.135498  | -2.684632 |
| 25 | 1 | 0 | -3.643465 | 1.663068  | -3.648678 |
| 26 | 1 | 0 | -2.297633 | 2.758883  | -3.233795 |
| 27 | 1 | 0 | 1.260586  | -1.562653 | 4.205127  |
| 28 | 1 | 0 | 0.198249  | -2.724946 | 3.341617  |
| 29 | 1 | 0 | -0.517823 | -1.483394 | 4.428682  |
| 30 | 1 | 0 | 0.487923  | 0.586285  | -0.968864 |
| 31 | 6 | 0 | 2.513776  | -1.175979 | -1.104403 |
| 32 | 6 | 0 | 3.758683  | -1.674258 | -0.712570 |
| 33 | 6 | 0 | 2.353959  | -0.741756 | -2.427444 |
| 34 | 6 | 0 | 4.828122  | -1.719117 | -1.605349 |
| 35 | 1 | 0 | 3.879462  | -2.054302 | 0.300091  |
| 36 | 6 | 0 | 3.421549  | -0.782212 | -3.318419 |
| 37 | 1 | 0 | 1.382864  | -0.388383 | -2.768645 |
| 38 | 6 | 0 | 4.664620  | -1.265033 | -2.909821 |
| 39 | 1 | 0 | 5.785705  | -2.115247 | -1.280362 |
| 40 | 1 | 0 | 3.279295  | -0.444345 | -4.340625 |
| 41 | 1 | 0 | 5.494806  | -1.297683 | -3.608654 |
| 42 | 1 | 0 | 1.712058  | -1.539187 | 0.845143  |
| 43 | 6 | 0 | -0.583290 | -1.750642 | -1.576841 |
| 44 | 7 | 0 | -1.240867 | -1.291431 | -2.429242 |
| 45 | 6 | 0 | 0.016909  | -3.262077 | 0.321912  |
| 46 | 8 | 0 | 0.724011  | -3.511535 | 1.312011  |
| 47 | 6 | 0 | -1.183728 | -4.136263 | 0.021613  |
| 48 | 1 | 0 | -2.011872 | -3.788284 | 0.650238  |
| 49 | 1 | 0 | -1.497745 | -4.082938 | -1.023169 |
| 50 | 1 | 0 | -0.952883 | -5.167441 | 0.296060  |



|    |   |   |           |          |           |
|----|---|---|-----------|----------|-----------|
| 51 | 6 | 0 | 2.614832  | 0.826094 | 1.588383  |
| 52 | 1 | 0 | 2.146266  | 0.132866 | 2.282803  |
| 53 | 1 | 0 | 3.320957  | 0.284040 | 0.956419  |
| 54 | 6 | 0 | 2.228709  | 2.101912 | -0.449943 |
| 55 | 1 | 0 | 2.721728  | 1.364880 | -1.084893 |
| 56 | 1 | 0 | 1.428290  | 2.579867 | -1.017588 |
| 57 | 6 | 0 | 0.683715  | 2.325230 | 1.418740  |
| 58 | 1 | 0 | -0.149893 | 2.581184 | 0.765459  |
| 59 | 1 | 0 | 0.310330  | 1.792707 | 2.296315  |
| 60 | 7 | 0 | 2.966827  | 3.283518 | 1.603891  |
| 61 | 6 | 0 | 3.228734  | 3.102404 | 0.176240  |
| 62 | 1 | 0 | 3.150611  | 4.070064 | -0.327126 |
| 63 | 1 | 0 | 4.257660  | 2.749041 | 0.060563  |
| 64 | 6 | 0 | 3.277122  | 2.033438 | 2.294223  |
| 65 | 1 | 0 | 4.361689  | 1.895789 | 2.321018  |
| 66 | 1 | 0 | 2.927014  | 2.120621 | 3.327238  |
| 67 | 6 | 0 | 1.543569  | 3.559998 | 1.781140  |
| 68 | 1 | 0 | 1.361418  | 3.848497 | 2.820236  |
| 69 | 1 | 0 | 1.278527  | 4.411580 | 1.147850  |
| 70 | 7 | 0 | 1.540212  | 1.341044 | 0.663712  |

-----

**1a-TS<sub>[2+1]</sub>**

Zero-point correction= 0.583783 (Hartree/Particle)

Thermal correction to Energy= 0.618064

Thermal correction to Enthalpy= 0.619008

Thermal correction to Gibbs Free Energy= 0.517083

SCF Done: E(SOV) = -1682.18453033 A.U.

-----

| Center<br>Number | Atomic<br>Number | Atomic<br>Type | Coordinates (Angstroms) |   |   |
|------------------|------------------|----------------|-------------------------|---|---|
|                  |                  |                | X                       | Y | Z |

-----

|   |   |   |           |           |          |
|---|---|---|-----------|-----------|----------|
| 1 | 6 | 0 | -5.362225 | -0.080870 | 1.132474 |
|---|---|---|-----------|-----------|----------|

|    |   |   |           |           |           |
|----|---|---|-----------|-----------|-----------|
| 2  | 6 | 0 | -6.018203 | 0.446402  | 0.022934  |
| 3  | 6 | 0 | -5.305115 | 0.831831  | -1.113661 |
| 4  | 6 | 0 | -3.931683 | 0.655859  | -1.098265 |
| 5  | 6 | 0 | -3.245641 | 0.090373  | -0.003702 |
| 6  | 6 | 0 | -3.978046 | -0.260415 | 1.127684  |
| 7  | 7 | 0 | -3.023785 | 1.024796  | -2.090043 |
| 8  | 6 | 0 | -1.728096 | 0.794809  | -1.685334 |
| 9  | 6 | 0 | -1.818081 | 0.083124  | -0.356154 |
| 10 | 8 | 0 | -0.742360 | 1.150802  | -2.312690 |
| 11 | 6 | 0 | -3.363630 | 1.695678  | -3.321657 |
| 12 | 6 | 0 | 0.629484  | -0.262552 | -0.214563 |
| 13 | 6 | 0 | -0.737368 | -0.436620 | 0.285886  |
| 14 | 6 | 0 | -0.904473 | -1.096738 | 1.625378  |
| 15 | 8 | 0 | -0.355689 | -0.695269 | 2.625261  |
| 16 | 8 | 0 | -1.737138 | -2.130300 | 1.580162  |
| 17 | 6 | 0 | -1.891109 | -2.840753 | 2.814961  |
| 18 | 6 | 0 | 1.018972  | -2.264058 | -0.535005 |
| 19 | 6 | 0 | 1.758460  | -1.145906 | 0.166904  |
| 20 | 1 | 0 | -5.931107 | -0.356418 | 2.014051  |
| 21 | 1 | 0 | -7.096171 | 0.572023  | 0.042577  |
| 22 | 1 | 0 | -5.805777 | 1.263353  | -1.974331 |
| 23 | 1 | 0 | -3.491775 | -0.662973 | 2.007439  |
| 24 | 1 | 0 | -3.868124 | 2.646469  | -3.118308 |
| 25 | 1 | 0 | -4.016455 | 1.064962  | -3.932272 |
| 26 | 1 | 0 | -2.431964 | 1.882378  | -3.856494 |
| 27 | 1 | 0 | -2.612421 | -3.628916 | 2.605476  |
| 28 | 1 | 0 | -2.265163 | -2.168254 | 3.591444  |
| 29 | 1 | 0 | -0.926041 | -3.256747 | 3.105716  |
| 30 | 1 | 0 | 0.671767  | 0.123879  | -1.227740 |
| 31 | 6 | 0 | 3.139166  | -0.823316 | -0.348715 |
| 32 | 6 | 0 | 4.236384  | -1.021500 | 0.492776  |
| 33 | 6 | 0 | 3.366108  | -0.383744 | -1.657306 |
| 34 | 6 | 0 | 5.532144  | -0.773128 | 0.048581  |
| 35 | 1 | 0 | 4.068633  | -1.378939 | 1.506226  |
| 36 | 6 | 0 | 4.661800  | -0.134784 | -2.101807 |

|    |   |   |           |           |           |
|----|---|---|-----------|-----------|-----------|
| 37 | 1 | 0 | 2.535681  | -0.243881 | -2.344617 |
| 38 | 6 | 0 | 5.748087  | -0.325029 | -1.251319 |
| 39 | 1 | 0 | 6.371232  | -0.933543 | 0.718796  |
| 40 | 1 | 0 | 4.820708  | 0.202896  | -3.121356 |
| 41 | 1 | 0 | 6.756841  | -0.131201 | -1.602697 |
| 42 | 1 | 0 | 1.771674  | -1.401879 | 1.229245  |
| 43 | 6 | 0 | 0.990563  | -2.362811 | -1.947564 |
| 44 | 7 | 0 | 0.945079  | -2.440864 | -3.107974 |
| 45 | 6 | 0 | 0.551803  | -3.378665 | 0.280442  |
| 46 | 8 | 0 | 0.746847  | -3.410129 | 1.493911  |
| 47 | 6 | 0 | -0.210336 | -4.486636 | -0.413554 |
| 48 | 1 | 0 | -1.182085 | -4.098385 | -0.739610 |
| 49 | 1 | 0 | 0.314305  | -4.844995 | -1.303380 |
| 50 | 1 | 0 | -0.362504 | -5.304152 | 0.291887  |
| 51 | 6 | 0 | 1.927356  | 1.525822  | 1.734249  |
| 52 | 1 | 0 | 1.412996  | 0.860109  | 2.432786  |
| 53 | 1 | 0 | 2.844291  | 1.037644  | 1.395898  |
| 54 | 6 | 0 | 1.765836  | 2.480899  | -0.476284 |
| 55 | 1 | 0 | 2.617553  | 1.890360  | -0.822602 |
| 56 | 1 | 0 | 1.077261  | 2.613971  | -1.316091 |
| 57 | 6 | 0 | -0.158479 | 2.430466  | 0.960411  |
| 58 | 1 | 0 | -0.826499 | 2.484254  | 0.097263  |
| 59 | 1 | 0 | -0.651463 | 1.846946  | 1.744076  |
| 60 | 7 | 0 | 1.695228  | 3.989913  | 1.502676  |
| 61 | 6 | 0 | 2.225571  | 3.833873  | 0.147286  |
| 62 | 1 | 0 | 1.884029  | 4.679579  | -0.457931 |
| 63 | 1 | 0 | 3.317493  | 3.885406  | 0.203807  |
| 64 | 6 | 0 | 2.231488  | 2.923207  | 2.349579  |
| 65 | 1 | 0 | 3.310314  | 3.073937  | 2.456206  |
| 66 | 1 | 0 | 1.782669  | 3.023102  | 3.343014  |
| 67 | 6 | 0 | 0.241816  | 3.852250  | 1.453337  |
| 68 | 1 | 0 | -0.161986 | 4.044750  | 2.452220  |
| 69 | 1 | 0 | -0.151008 | 4.621905  | 0.781211  |
| 70 | 7 | 0 | 1.054120  | 1.693173  | 0.552055  |

---

**1a-TS<sub>[3+2]</sub>**

Zero-point correction= 0.587688 (Hartree/Particle)

Thermal correction to Energy= 0.619996

Thermal correction to Enthalpy= 0.620940

Thermal correction to Gibbs Free Energy= 0.526303

SCF Done: E(SOV) = -1682.18450809 A.U.

---

| Center<br>Number | Atomic<br>Number | Atomic<br>Type | Coordinates (Angstroms) |           |           |
|------------------|------------------|----------------|-------------------------|-----------|-----------|
|                  |                  |                | X                       | Y         | Z         |
| 1                | 6                | 0              | -4.850283               | -1.595725 | -0.737669 |
| 2                | 6                | 0              | -5.635707               | -0.741464 | 0.031391  |
| 3                | 6                | 0              | -5.049420               | 0.136840  | 0.943407  |
| 4                | 6                | 0              | -3.667059               | 0.117849  | 1.048362  |
| 5                | 6                | 0              | -2.852487               | -0.730196 | 0.283304  |
| 6                | 6                | 0              | -3.457551               | -1.593682 | -0.622843 |
| 7                | 7                | 0              | -2.883425               | 0.910452  | 1.889564  |
| 8                | 6                | 0              | -1.552699               | 0.682449  | 1.691719  |
| 9                | 6                | 0              | -1.420788               | -0.347287 | 0.550939  |
| 10               | 8                | 0              | -0.668264               | 1.250076  | 2.320239  |
| 11               | 6                | 0              | -3.390068               | 1.972597  | 2.725129  |
| 12               | 6                | 0              | 0.897255                | -0.239085 | 0.438852  |
| 13               | 6                | 0              | -0.257048               | -1.204620 | 0.516819  |
| 14               | 6                | 0              | -0.374301               | -2.503681 | -0.073562 |
| 15               | 8                | 0              | -1.326931               | -3.263425 | -0.016940 |
| 16               | 8                | 0              | 0.779198                | -2.945980 | -0.716733 |
| 17               | 6                | 0              | 0.633936                | -4.199948 | -1.370197 |
| 18               | 6                | 0              | -0.906872               | 0.861993  | -0.858767 |
| 19               | 6                | 0              | 0.621041                | 0.699011  | -0.811971 |
| 20               | 1                | 0              | -5.321555               | -2.274533 | -1.441079 |
| 21               | 1                | 0              | -6.716124               | -0.755389 | -0.075605 |
| 22               | 1                | 0              | -5.649924               | 0.810364  | 1.546144  |
| 23               | 1                | 0              | -2.857686               | -2.255585 | -1.232873 |

|    |   |   |           |           |           |
|----|---|---|-----------|-----------|-----------|
| 24 | 1 | 0 | -4.098604 | 1.578153  | 3.459724  |
| 25 | 1 | 0 | -3.881107 | 2.731578  | 2.107138  |
| 26 | 1 | 0 | -2.537338 | 2.418031  | 3.237233  |
| 27 | 1 | 0 | 1.608685  | -4.423821 | -1.809444 |
| 28 | 1 | 0 | -0.125396 | -4.133203 | -2.152841 |
| 29 | 1 | 0 | 0.342276  | -4.980309 | -0.664004 |
| 30 | 1 | 0 | 0.827309  | 0.407452  | 1.314954  |
| 31 | 6 | 0 | 1.391763  | 1.999919  | -0.830212 |
| 32 | 6 | 0 | 2.260499  | 2.278832  | -1.888525 |
| 33 | 6 | 0 | 1.292394  | 2.923387  | 0.219820  |
| 34 | 6 | 0 | 3.033051  | 3.439092  | -1.896152 |
| 35 | 1 | 0 | 2.326688  | 1.579650  | -2.720097 |
| 36 | 6 | 0 | 2.060269  | 4.083150  | 0.209852  |
| 37 | 1 | 0 | 0.615844  | 2.725237  | 1.049267  |
| 38 | 6 | 0 | 2.937857  | 4.342266  | -0.842392 |
| 39 | 1 | 0 | 3.702217  | 3.637737  | -2.728001 |
| 40 | 1 | 0 | 1.969979  | 4.791016  | 1.028149  |
| 41 | 1 | 0 | 3.536243  | 5.248052  | -0.843856 |
| 42 | 1 | 0 | 0.872123  | 0.118040  | -1.704364 |
| 43 | 6 | 0 | -1.462407 | 2.167359  | -0.596087 |
| 44 | 7 | 0 | -1.982493 | 3.171729  | -0.336923 |
| 45 | 6 | 0 | -1.518983 | 0.193494  | -2.056938 |
| 46 | 8 | 0 | -0.981578 | -0.793462 | -2.529133 |
| 47 | 6 | 0 | -2.807380 | 0.747456  | -2.618729 |
| 48 | 1 | 0 | -3.517862 | 1.005604  | -1.828370 |
| 49 | 1 | 0 | -2.586579 | 1.666831  | -3.174160 |
| 50 | 1 | 0 | -3.243511 | 0.009176  | -3.292453 |
| 51 | 6 | 0 | 2.981880  | -1.128171 | -0.760241 |
| 52 | 1 | 0 | 2.258447  | -1.689255 | -1.345752 |
| 53 | 1 | 0 | 3.202738  | -0.176865 | -1.251136 |
| 54 | 6 | 0 | 3.226944  | 0.304725  | 1.171596  |
| 55 | 1 | 0 | 3.076090  | 1.232533  | 0.624946  |
| 56 | 1 | 0 | 2.871193  | 0.441619  | 2.196133  |
| 57 | 6 | 0 | 2.377668  | -1.927324 | 1.525551  |
| 58 | 1 | 0 | 1.786763  | -1.622323 | 2.391055  |

|    |   |   |          |           |           |
|----|---|---|----------|-----------|-----------|
| 59 | 1 | 0 | 1.878452 | -2.755039 | 1.033004  |
| 60 | 7 | 0 | 4.755335 | -1.625287 | 0.897564  |
| 61 | 6 | 0 | 4.695275 | -0.180438 | 1.104600  |
| 62 | 1 | 0 | 5.212372 | 0.074361  | 2.034020  |
| 63 | 1 | 0 | 5.226394 | 0.310680  | 0.283706  |
| 64 | 6 | 0 | 4.267411 | -1.921621 | -0.452755 |
| 65 | 1 | 0 | 5.041861 | -1.668343 | -1.182851 |
| 66 | 1 | 0 | 4.083032 | -2.998533 | -0.520025 |
| 67 | 6 | 0 | 3.851363 | -2.250091 | 1.863086  |
| 68 | 1 | 0 | 4.002522 | -3.333031 | 1.847008  |
| 69 | 1 | 0 | 4.120890 | -1.893163 | 2.861827  |
| 70 | 7 | 0 | 2.339277 | -0.760737 | 0.556765  |

### 1a-III

Zero-point correction= 0.396055 (Hartree/Particle)

Thermal correction to Energy= 0.422807

Thermal correction to Enthalpy= 0.423751

Thermal correction to Gibbs Free Energy= 0.338055

SCF Done: E(SOV) = -1336.89677306 A.U.

| Center<br>Number | Atomic<br>Number | Atomic<br>Type | Coordinates (Angstroms) |   |   |
|------------------|------------------|----------------|-------------------------|---|---|
|                  |                  |                | X                       | Y | Z |

|   |   |   |           |           |           |
|---|---|---|-----------|-----------|-----------|
| 1 | 6 | 0 | -5.352201 | 0.431873  | -0.445307 |
| 2 | 6 | 0 | -5.742944 | -0.900215 | -0.357565 |
| 3 | 6 | 0 | -4.801407 | -1.905029 | -0.131457 |
| 4 | 6 | 0 | -3.478168 | -1.523633 | 0.009633  |
| 5 | 6 | 0 | -3.050880 | -0.179013 | -0.064816 |
| 6 | 6 | 0 | -4.012474 | 0.801250  | -0.308851 |
| 7 | 7 | 0 | -2.396817 | -2.370395 | 0.239962  |
| 8 | 6 | 0 | -1.226488 | -1.658540 | 0.344695  |
| 9 | 6 | 0 | -1.586723 | -0.192295 | 0.136313  |

|    |   |   |           |           |           |
|----|---|---|-----------|-----------|-----------|
| 10 | 8 | 0 | -0.143507 | -2.145303 | 0.601425  |
| 11 | 6 | 0 | -2.475489 | -3.800977 | 0.407220  |
| 12 | 6 | 0 | 0.808013  | 0.374557  | 0.484334  |
| 13 | 6 | 0 | -0.624289 | 0.753807  | 0.231350  |
| 14 | 6 | 0 | -0.970523 | 2.210706  | 0.228496  |
| 15 | 8 | 0 | -1.882868 | 2.727466  | -0.364607 |
| 16 | 8 | 0 | -0.129544 | 2.909304  | 1.014636  |
| 17 | 6 | 0 | -0.379585 | 4.315574  | 1.040425  |
| 18 | 6 | 0 | 1.971541  | 1.231798  | -0.016280 |
| 19 | 6 | 0 | 1.684787  | -0.178660 | -0.574864 |
| 20 | 1 | 0 | -6.094944 | 1.200462  | -0.630653 |
| 21 | 1 | 0 | -6.789110 | -1.166956 | -0.472469 |
| 22 | 1 | 0 | -5.093435 | -2.948241 | -0.069153 |
| 23 | 1 | 0 | -3.726368 | 1.837373  | -0.404644 |
| 24 | 1 | 0 | -2.880330 | -4.271366 | -0.494467 |
| 25 | 1 | 0 | -3.110582 | -4.055508 | 1.262048  |
| 26 | 1 | 0 | -1.461981 | -4.162271 | 0.584493  |
| 27 | 1 | 0 | 0.355777  | 4.733334  | 1.726523  |
| 28 | 1 | 0 | -1.393729 | 4.514575  | 1.392305  |
| 29 | 1 | 0 | -0.262467 | 4.733807  | 0.036919  |
| 30 | 1 | 0 | 0.985505  | -0.020117 | 1.482012  |
| 31 | 6 | 0 | 2.670515  | -1.279338 | -0.383671 |
| 32 | 6 | 0 | 3.419527  | -1.687631 | -1.490529 |
| 33 | 6 | 0 | 2.903339  | -1.886677 | 0.851042  |
| 34 | 6 | 0 | 4.385406  | -2.680742 | -1.368246 |
| 35 | 1 | 0 | 3.242193  | -1.219537 | -2.455807 |
| 36 | 6 | 0 | 3.872263  | -2.876655 | 0.975329  |
| 37 | 1 | 0 | 2.311257  | -1.608292 | 1.716557  |
| 38 | 6 | 0 | 4.616588  | -3.276451 | -0.131418 |
| 39 | 1 | 0 | 4.957639  | -2.986762 | -2.238657 |
| 40 | 1 | 0 | 4.040672  | -3.341431 | 1.941762  |
| 41 | 1 | 0 | 5.370846  | -4.050593 | -0.030009 |
| 42 | 1 | 0 | 1.271576  | -0.090717 | -1.578358 |
| 43 | 6 | 0 | 3.065639  | 1.390442  | 0.911955  |
| 44 | 7 | 0 | 3.938074  | 1.533766  | 1.658158  |

|    |   |   |          |          |           |
|----|---|---|----------|----------|-----------|
| 45 | 6 | 0 | 1.708277 | 2.377849 | -0.957290 |
| 46 | 8 | 0 | 0.846002 | 2.272954 | -1.803736 |
| 47 | 6 | 0 | 2.544583 | 3.619542 | -0.792155 |
| 48 | 1 | 0 | 2.453727 | 3.995627 | 0.232471  |
| 49 | 1 | 0 | 3.602972 | 3.386345 | -0.950491 |
| 50 | 1 | 0 | 2.215481 | 4.372048 | -1.509037 |

-----

**1a-TS<sub>30</sub>**

Zero-point correction= 0.395076 (Hartree/Particle)

Thermal correction to Energy= 0.421747

Thermal correction to Enthalpy= 0.422691

Thermal correction to Gibbs Free Energy= 0.337285

SCF Done: E(SOV) = -1336.87051491 A.U.

-----

Center Atomic Atomic Coordinates (Angstroms)

| Number | Number | Type | X         | Y         | Z         |
|--------|--------|------|-----------|-----------|-----------|
| 1      | 6      | 0    | 5.354928  | 0.224223  | 0.015502  |
| 2      | 6      | 0    | 5.643277  | -1.137919 | 0.011048  |
| 3      | 6      | 0    | 4.617190  | -2.085465 | -0.006018 |
| 4      | 6      | 0    | 3.320914  | -1.607314 | -0.026166 |
| 5      | 6      | 0    | 3.000429  | -0.237407 | -0.036013 |
| 6      | 6      | 0    | 4.037775  | 0.689033  | -0.002166 |
| 7      | 7      | 0    | 2.135689  | -2.371069 | -0.026709 |
| 8      | 6      | 0    | 1.060422  | -1.561405 | -0.036473 |
| 9      | 6      | 0    | 1.530074  | -0.154647 | -0.082087 |
| 10     | 8      | 0    | -0.118875 | -1.986234 | -0.027857 |
| 11     | 6      | 0    | 2.079389  | -3.816524 | 0.016157  |
| 12     | 6      | 0    | -0.846552 | 0.554101  | -0.401534 |
| 13     | 6      | 0    | 0.628082  | 0.835208  | -0.248789 |
| 14     | 6      | 0    | 1.047492  | 2.261277  | -0.460136 |
| 15     | 8      | 0    | 1.964314  | 2.814307  | 0.091942  |



|    |   |   |           |           |           |
|----|---|---|-----------|-----------|-----------|
| 16 | 8 | 0 | 0.266805  | 2.835826  | -1.378334 |
| 17 | 6 | 0 | 0.518983  | 4.223068  | -1.608408 |
| 18 | 6 | 0 | -1.767556 | 1.508535  | 0.327185  |
| 19 | 6 | 0 | -1.337202 | -0.620709 | 0.342224  |
| 20 | 1 | 0 | 6.167248  | 0.942885  | 0.043199  |
| 21 | 1 | 0 | 6.675505  | -1.472482 | 0.029248  |
| 22 | 1 | 0 | 4.829135  | -3.149754 | -0.000628 |
| 23 | 1 | 0 | 3.824982  | 1.748757  | 0.029571  |
| 24 | 1 | 0 | 2.594988  | -4.181976 | 0.908799  |
| 25 | 1 | 0 | 2.552399  | -4.238223 | -0.875168 |
| 26 | 1 | 0 | 1.030388  | -4.110195 | 0.048943  |
| 27 | 1 | 0 | -0.225712 | 4.539631  | -2.335936 |
| 28 | 1 | 0 | 1.530034  | 4.364654  | -1.996496 |
| 29 | 1 | 0 | 0.410222  | 4.778797  | -0.674793 |
| 30 | 1 | 0 | -1.081547 | 0.525854  | -1.470527 |
| 31 | 6 | 0 | -2.588898 | -1.321304 | 0.005404  |
| 32 | 6 | 0 | -3.075043 | -2.265711 | 0.917551  |
| 33 | 6 | 0 | -3.283299 | -1.103775 | -1.188669 |
| 34 | 6 | 0 | -4.231753 | -2.982448 | 0.642494  |
| 35 | 1 | 0 | -2.533377 | -2.435366 | 1.844514  |
| 36 | 6 | 0 | -4.448548 | -1.812930 | -1.456498 |
| 37 | 1 | 0 | -2.942140 | -0.360450 | -1.900975 |
| 38 | 6 | 0 | -4.922216 | -2.754192 | -0.546516 |
| 39 | 1 | 0 | -4.600786 | -3.711172 | 1.357196  |
| 40 | 1 | 0 | -4.990749 | -1.621620 | -2.376568 |
| 41 | 1 | 0 | -5.833289 | -3.304553 | -0.760066 |
| 42 | 1 | 0 | -1.064169 | -0.594019 | 1.394737  |
| 43 | 6 | 0 | -2.948745 | 1.918564  | -0.324649 |
| 44 | 7 | 0 | -3.914173 | 2.218572  | -0.903325 |
| 45 | 6 | 0 | -1.355005 | 1.965154  | 1.615018  |
| 46 | 8 | 0 | -0.277517 | 1.589440  | 2.104843  |
| 47 | 6 | 0 | -2.242675 | 2.921108  | 2.386647  |
| 48 | 1 | 0 | -1.722781 | 3.879140  | 2.483535  |
| 49 | 1 | 0 | -3.211305 | 3.084009  | 1.910710  |
| 50 | 1 | 0 | -2.386242 | 2.525742  | 3.395545  |

-----

### 3o

Zero-point correction= 0.399019 (Hartree/Particle)

Thermal correction to Energy= 0.424903

Thermal correction to Enthalpy= 0.425847

Thermal correction to Gibbs Free Energy= 0.341665

SCF Done: E(SOV) = -1336.91416730 A.U.

-----

Center Atomic Atomic Coordinates (Angstroms)

| Number | Number | Type | X         | Y         | Z         |
|--------|--------|------|-----------|-----------|-----------|
| 1      | 6      | 0    | 5.159982  | 0.267202  | 0.541846  |
| 2      | 6      | 0    | 5.454255  | -1.105070 | 0.509433  |
| 3      | 6      | 0    | 4.445677  | -2.056166 | 0.413156  |
| 4      | 6      | 0    | 3.134802  | -1.591970 | 0.349484  |
| 5      | 6      | 0    | 2.817304  | -0.212557 | 0.390392  |
| 6      | 6      | 0    | 3.850674  | 0.724856  | 0.486200  |
| 7      | 7      | 0    | 1.949905  | -2.309507 | 0.237617  |
| 8      | 6      | 0    | 0.927236  | -1.406315 | 0.203838  |
| 9      | 6      | 0    | 1.384699  | -0.120540 | 0.306941  |
| 10     | 8      | 0    | -0.340090 | -1.822438 | 0.067089  |
| 11     | 6      | 0    | 1.821975  | -3.748741 | 0.192970  |
| 12     | 6      | 0    | -0.962919 | 0.537288  | -0.232595 |
| 13     | 6      | 0    | 0.469465  | 1.021325  | 0.104446  |
| 14     | 6      | 0    | 1.001775  | 1.963166  | -0.992085 |
| 15     | 8      | 0    | 1.356460  | 3.097461  | -0.807591 |
| 16     | 8      | 0    | 1.042926  | 1.339920  | -2.173831 |
| 17     | 6      | 0    | 1.597253  | 2.115520  | -3.238495 |
| 18     | 6      | 0    | -1.752248 | 1.675949  | 0.381613  |
| 19     | 6      | 0    | -1.279755 | -0.805907 | 0.464867  |
| 20     | 1      | 0    | 5.973073  | 0.982278  | 0.617363  |
| 21     | 1      | 0    | 6.488204  | -1.431120 | 0.560240  |

|    |   |   |           |           |           |
|----|---|---|-----------|-----------|-----------|
| 22 | 1 | 0 | 4.672131  | -3.117925 | 0.384874  |
| 23 | 1 | 0 | 3.623840  | 1.786924  | 0.520193  |
| 24 | 1 | 0 | 2.279316  | -4.196917 | 1.080109  |
| 25 | 1 | 0 | 2.305498  | -4.150201 | -0.702824 |
| 26 | 1 | 0 | 0.761039  | -3.999019 | 0.171001  |
| 27 | 1 | 0 | 1.554514  | 1.480114  | -4.121082 |
| 28 | 1 | 0 | 2.630036  | 2.382924  | -3.004807 |
| 29 | 1 | 0 | 1.015073  | 3.027350  | -3.386882 |
| 30 | 1 | 0 | -1.095861 | 0.426623  | -1.312681 |
| 31 | 6 | 0 | -2.664245 | -1.294323 | 0.139752  |
| 32 | 6 | 0 | -3.713744 | -1.052207 | 1.023909  |
| 33 | 6 | 0 | -2.919210 | -1.929864 | -1.076958 |
| 34 | 6 | 0 | -5.011849 | -1.428879 | 0.692003  |
| 35 | 1 | 0 | -3.516407 | -0.552174 | 1.969078  |
| 36 | 6 | 0 | -4.213968 | -2.318949 | -1.401686 |
| 37 | 1 | 0 | -2.097105 | -2.126863 | -1.759269 |
| 38 | 6 | 0 | -5.262782 | -2.064426 | -0.519795 |
| 39 | 1 | 0 | -5.825244 | -1.223955 | 1.380481  |
| 40 | 1 | 0 | -4.406517 | -2.816302 | -2.347304 |
| 41 | 1 | 0 | -6.274670 | -2.359712 | -0.779205 |
| 42 | 1 | 0 | -1.165413 | -0.656114 | 1.547722  |
| 43 | 6 | 0 | -3.117088 | 1.991549  | 0.150421  |
| 44 | 7 | 0 | -4.228378 | 2.267104  | -0.034729 |
| 45 | 6 | 0 | -0.949049 | 2.331666  | 1.249123  |
| 46 | 8 | 0 | 0.311148  | 1.849845  | 1.279514  |
| 47 | 6 | 0 | -1.230904 | 3.477944  | 2.147514  |
| 48 | 1 | 0 | -0.595102 | 4.320407  | 1.859282  |
| 49 | 1 | 0 | -2.280644 | 3.768469  | 2.085067  |
| 50 | 1 | 0 | -0.984022 | 3.210446  | 3.179199  |

---

**4-II**

Zero-point correction= 0.542143 (Hartree/Particle)  
 Thermal correction to Energy= 0.573473  
 Thermal correction to Enthalpy= 0.574417  
 Thermal correction to Gibbs Free Energy= 0.479184  
 SCF Done: E(SOV) = -1546.60593438 A.U.

-----  
 Center Atomic Atomic Coordinates (Angstroms)  
 Number Number Type X Y Z  
 -----

|    |   |   |           |           |           |
|----|---|---|-----------|-----------|-----------|
| 1  | 6 | 0 | -5.254327 | 0.387390  | -1.488520 |
| 2  | 6 | 0 | -5.988151 | 0.090362  | -0.341768 |
| 3  | 6 | 0 | -5.366437 | -0.395631 | 0.811910  |
| 4  | 6 | 0 | -3.995432 | -0.575710 | 0.768521  |
| 5  | 6 | 0 | -3.235628 | -0.284247 | -0.382204 |
| 6  | 6 | 0 | -3.869781 | 0.208769  | -1.517497 |
| 7  | 7 | 0 | -3.159704 | -1.048517 | 1.781313  |
| 8  | 6 | 0 | -1.851157 | -1.068744 | 1.371032  |
| 9  | 6 | 0 | -1.840632 | -0.527558 | -0.032221 |
| 10 | 8 | 0 | -0.920955 | -1.543936 | 2.016844  |
| 11 | 6 | 0 | -3.583614 | -1.394871 | 3.115639  |
| 12 | 6 | 0 | 0.660048  | -0.218972 | -0.054413 |
| 13 | 6 | 0 | -0.705892 | -0.223247 | -0.715465 |
| 14 | 6 | 0 | 0.160686  | 2.135169  | -0.187963 |
| 15 | 6 | 0 | 1.301936  | 1.149155  | -0.341459 |
| 16 | 1 | 0 | -5.761488 | 0.767623  | -2.368802 |
| 17 | 1 | 0 | -7.063003 | 0.242331  | -0.338643 |
| 18 | 1 | 0 | -5.936137 | -0.615976 | 1.708825  |
| 19 | 1 | 0 | -3.305582 | 0.452132  | -2.411362 |
| 20 | 1 | 0 | -4.338807 | -2.186803 | 3.085232  |
| 21 | 1 | 0 | -3.994975 | -0.515954 | 3.621769  |
| 22 | 1 | 0 | -2.703811 | -1.746592 | 3.655026  |
| 23 | 1 | 0 | 0.492773  | -0.334468 | 1.016916  |
| 24 | 6 | 0 | 2.525627  | 1.470281  | 0.492462  |
| 25 | 6 | 0 | 3.744630  | 1.758934  | -0.123441 |
| 26 | 6 | 0 | 2.451029  | 1.500827  | 1.891381  |

|    |   |   |           |           |           |
|----|---|---|-----------|-----------|-----------|
| 27 | 6 | 0 | 4.878617  | 2.043178  | 0.637479  |
| 28 | 1 | 0 | 3.793780  | 1.791452  | -1.210270 |
| 29 | 6 | 0 | 3.581852  | 1.780233  | 2.650329  |
| 30 | 1 | 0 | 1.497355  | 1.319746  | 2.384020  |
| 31 | 6 | 0 | 4.801691  | 2.044611  | 2.026046  |
| 32 | 1 | 0 | 5.817467  | 2.272482  | 0.142208  |
| 33 | 1 | 0 | 3.510040  | 1.802749  | 3.733606  |
| 34 | 1 | 0 | 5.682058  | 2.266853  | 2.621162  |
| 35 | 1 | 0 | 1.564358  | 1.231939  | -1.403170 |
| 36 | 6 | 0 | -0.648012 | 2.056311  | 0.951352  |
| 37 | 7 | 0 | -1.318021 | 1.826973  | 1.884347  |
| 38 | 6 | 0 | 0.002173  | 3.115543  | -1.227912 |
| 39 | 8 | 0 | 0.751272  | 3.147563  | -2.207324 |
| 40 | 6 | 0 | -1.166617 | 4.080553  | -1.141221 |
| 41 | 1 | 0 | -1.945809 | 3.738781  | -1.831225 |
| 42 | 1 | 0 | -1.594230 | 4.149192  | -0.138648 |
| 43 | 1 | 0 | -0.836278 | 5.066006  | -1.476387 |
| 44 | 6 | 0 | 2.309828  | -1.257186 | -1.684363 |
| 45 | 1 | 0 | 1.634195  | -0.869997 | -2.450836 |
| 46 | 1 | 0 | 3.057103  | -0.495205 | -1.454241 |
| 47 | 6 | 0 | 2.462899  | -1.769420 | 0.709682  |
| 48 | 1 | 0 | 2.970803  | -0.844866 | 0.981652  |
| 49 | 1 | 0 | 1.829210  | -2.083006 | 1.544569  |
| 50 | 6 | 0 | 0.635112  | -2.679414 | -0.606231 |
| 51 | 1 | 0 | -0.044718 | -2.704939 | 0.247747  |
| 52 | 1 | 0 | 0.063701  | -2.516490 | -1.522281 |
| 53 | 7 | 0 | 2.932182  | -3.546023 | -0.952426 |
| 54 | 6 | 0 | 3.444833  | -2.865490 | 0.236755  |
| 55 | 1 | 0 | 3.597962  | -3.598288 | 1.033618  |
| 56 | 1 | 0 | 4.418355  | -2.431023 | -0.008966 |
| 57 | 6 | 0 | 2.955047  | -2.609240 | -2.075180 |
| 58 | 1 | 0 | 3.989910  | -2.446098 | -2.387807 |
| 59 | 1 | 0 | 2.422901  | -3.067272 | -2.913844 |
| 60 | 6 | 0 | 1.544748  | -3.928079 | -0.697632 |
| 61 | 1 | 0 | 1.197008  | -4.581412 | -1.502484 |

|    |   |   |           |           |           |
|----|---|---|-----------|-----------|-----------|
| 62 | 1 | 0 | 1.512283  | -4.500336 | 0.233927  |
| 63 | 7 | 0 | 1.511575  | -1.460490 | -0.423205 |
| 64 | 6 | 0 | -0.753280 | 0.133499  | -2.104221 |
| 65 | 7 | 0 | -0.734562 | 0.323256  | -3.248989 |

---

#### 4-TS<sub>[2+1]</sub>

Zero-point correction= 0.538107 (Hartree/Particle)

Thermal correction to Energy= 0.570114

Thermal correction to Enthalpy= 0.571058

Thermal correction to Gibbs Free Energy= 0.472509

SCF Done: E(SOV) = -1546.56191510 A.U.

---

| Center<br>Number | Atomic<br>Number | Atomic<br>Type | Coordinates (Angstroms) |   |   |
|------------------|------------------|----------------|-------------------------|---|---|
|                  |                  |                | X                       | Y | Z |

---

|    |   |   |           |           |           |
|----|---|---|-----------|-----------|-----------|
| 1  | 6 | 0 | 5.303301  | -0.266009 | -1.748821 |
| 2  | 6 | 0 | 6.092780  | 0.010672  | -0.634669 |
| 3  | 6 | 0 | 5.518917  | 0.273504  | 0.612511  |
| 4  | 6 | 0 | 4.138219  | 0.253075  | 0.694752  |
| 5  | 6 | 0 | 3.319401  | -0.017548 | -0.421263 |
| 6  | 6 | 0 | 3.910834  | -0.287010 | -1.652705 |
| 7  | 7 | 0 | 3.345343  | 0.482845  | 1.822161  |
| 8  | 6 | 0 | 2.007838  | 0.397073  | 1.511381  |
| 9  | 6 | 0 | 1.939748  | 0.014601  | 0.055436  |
| 10 | 8 | 0 | 1.093283  | 0.663829  | 2.275526  |
| 11 | 6 | 0 | 3.839013  | 0.846281  | 3.128884  |
| 12 | 6 | 0 | -0.553527 | -0.276796 | 0.045871  |
| 13 | 6 | 0 | 0.775315  | -0.252528 | -0.595554 |
| 14 | 6 | 0 | -0.724989 | -2.349727 | 0.018964  |
| 15 | 6 | 0 | -1.584711 | -1.209809 | -0.486671 |
| 16 | 1 | 0 | 5.773650  | -0.469369 | -2.704745 |

|    |   |   |           |           |           |
|----|---|---|-----------|-----------|-----------|
| 17 | 1 | 0 | 7.173822  | 0.020957  | -0.732074 |
| 18 | 1 | 0 | 6.132439  | 0.484130  | 1.482499  |
| 19 | 1 | 0 | 3.308606  | -0.509695 | -2.526220 |
| 20 | 1 | 0 | 4.403991  | 1.783011  | 3.081338  |
| 21 | 1 | 0 | 4.483208  | 0.056308  | 3.526715  |
| 22 | 1 | 0 | 2.973081  | 0.972937  | 3.779511  |
| 23 | 1 | 0 | -0.526899 | -0.151515 | 1.124090  |
| 24 | 6 | 0 | -3.006754 | -1.142964 | 0.012871  |
| 25 | 6 | 0 | -4.047213 | -1.235291 | -0.915133 |
| 26 | 6 | 0 | -3.325271 | -1.041721 | 1.371669  |
| 27 | 6 | 0 | -5.377164 | -1.213563 | -0.503882 |
| 28 | 1 | 0 | -3.808247 | -1.333343 | -1.971721 |
| 29 | 6 | 0 | -4.655023 | -1.018621 | 1.783409  |
| 30 | 1 | 0 | -2.536040 | -0.993710 | 2.117499  |
| 31 | 6 | 0 | -5.684673 | -1.101641 | 0.848639  |
| 32 | 1 | 0 | -6.170600 | -1.289849 | -1.241107 |
| 33 | 1 | 0 | -4.884950 | -0.944424 | 2.841880  |
| 34 | 1 | 0 | -6.720016 | -1.086752 | 1.174748  |
| 35 | 1 | 0 | -1.554744 | -1.272242 | -1.579586 |
| 36 | 6 | 0 | -0.695212 | -2.685059 | 1.392773  |
| 37 | 7 | 0 | -0.650817 | -2.949679 | 2.526201  |
| 38 | 6 | 0 | -0.060294 | -3.211756 | -0.951949 |
| 39 | 8 | 0 | -0.146729 | -3.010944 | -2.157946 |
| 40 | 6 | 0 | 0.755708  | -4.366600 | -0.404370 |
| 41 | 1 | 0 | 1.552499  | -3.993291 | 0.248098  |
| 42 | 1 | 0 | 0.132579  | -5.032019 | 0.201010  |
| 43 | 1 | 0 | 1.187772  | -4.917702 | -1.239828 |
| 44 | 6 | 0 | -1.972961 | 1.750178  | -1.432450 |
| 45 | 1 | 0 | -1.405538 | 1.348568  | -2.278786 |
| 46 | 1 | 0 | -2.841040 | 1.108267  | -1.263636 |
| 47 | 6 | 0 | -1.892635 | 2.079363  | 0.962725  |
| 48 | 1 | 0 | -2.682395 | 1.343252  | 1.124723  |
| 49 | 1 | 0 | -1.206859 | 2.045010  | 1.815390  |
| 50 | 6 | 0 | 0.029687  | 2.586402  | -0.384921 |
| 51 | 1 | 0 | 0.685530  | 2.443568  | 0.477091  |

|    |   |   |           |           |           |
|----|---|---|-----------|-----------|-----------|
| 52 | 1 | 0 | 0.572847  | 2.297115  | -1.289358 |
| 53 | 7 | 0 | -1.958244 | 4.066708  | -0.529722 |
| 54 | 6 | 0 | -2.477673 | 3.500978  | 0.716110  |
| 55 | 1 | 0 | -2.221558 | 4.175971  | 1.538370  |
| 56 | 1 | 0 | -3.568952 | 3.464016  | 0.643352  |
| 57 | 6 | 0 | -2.393273 | 3.233289  | -1.651236 |
| 58 | 1 | 0 | -3.480299 | 3.315089  | -1.744826 |
| 59 | 1 | 0 | -1.949213 | 3.636734  | -2.566395 |
| 60 | 6 | 0 | -0.498278 | 4.048581  | -0.475063 |
| 61 | 1 | 0 | -0.107883 | 4.545338  | -1.368359 |
| 62 | 1 | 0 | -0.182179 | 4.630754  | 0.395978  |
| 63 | 7 | 0 | -1.118211 | 1.662858  | -0.228063 |
| 64 | 6 | 0 | 0.799205  | -0.333353 | -2.034187 |
| 65 | 7 | 0 | 0.812368  | -0.234757 | -3.188435 |

#### 4-TS<sub>[3+2]</sub>

Zero-point correction= 0.541923 (Hartree/Particle)

Thermal correction to Energy= 0.571868

Thermal correction to Enthalpy= 0.572812

Thermal correction to Gibbs Free Energy= 0.482652

SCF Done: E(SOV) = -1546.58030766 A.U.

| Center<br>Number | Atomic<br>Number | Atomic<br>Type | Coordinates (Angstroms) |   |   |
|------------------|------------------|----------------|-------------------------|---|---|
|                  |                  |                | X                       | Y | Z |

|   |   |   |           |           |           |
|---|---|---|-----------|-----------|-----------|
| 1 | 6 | 0 | -4.602915 | -2.045917 | -1.031094 |
| 2 | 6 | 0 | -5.509296 | -1.299668 | -0.283091 |
| 3 | 6 | 0 | -5.076731 | -0.380281 | 0.678783  |
| 4 | 6 | 0 | -3.709931 | -0.242135 | 0.854456  |
| 5 | 6 | 0 | -2.783313 | -0.974775 | 0.096286  |
| 6 | 6 | 0 | -3.224344 | -1.885009 | -0.851605 |
| 7 | 7 | 0 | -3.034619 | 0.588120  | 1.754942  |
| 8 | 6 | 0 | -1.674598 | 0.455342  | 1.627736  |



|    |   |   |           |           |           |
|----|---|---|-----------|-----------|-----------|
| 9  | 6 | 0 | -1.426112 | -0.493646 | 0.459201  |
| 10 | 8 | 0 | -0.849308 | 1.030420  | 2.318684  |
| 11 | 6 | 0 | -3.660974 | 1.562579  | 2.616110  |
| 12 | 6 | 0 | 0.928680  | -0.391596 | 0.473911  |
| 13 | 6 | 0 | -0.256460 | -1.306668 | 0.462537  |
| 14 | 6 | 0 | -0.825955 | 0.877073  | -0.820875 |
| 15 | 6 | 0 | 0.684411  | 0.674415  | -0.688455 |
| 16 | 1 | 0 | -4.967544 | -2.755248 | -1.766482 |
| 17 | 1 | 0 | -6.574938 | -1.432329 | -0.443612 |
| 18 | 1 | 0 | -5.783823 | 0.198404  | 1.264309  |
| 19 | 1 | 0 | -2.514898 | -2.445070 | -1.452553 |
| 20 | 1 | 0 | -4.329355 | 1.074266  | 3.332175  |
| 21 | 1 | 0 | -4.225322 | 2.284464  | 2.017229  |
| 22 | 1 | 0 | -2.864000 | 2.080985  | 3.149699  |
| 23 | 1 | 0 | 0.971718  | 0.161155  | 1.417769  |
| 24 | 6 | 0 | 1.484505  | 1.947806  | -0.550132 |
| 25 | 6 | 0 | 2.345433  | 2.333678  | -1.581601 |
| 26 | 6 | 0 | 1.426330  | 2.726958  | 0.611751  |
| 27 | 6 | 0 | 3.153987  | 3.460213  | -1.453113 |
| 28 | 1 | 0 | 2.378672  | 1.743177  | -2.495380 |
| 29 | 6 | 0 | 2.234623  | 3.852743  | 0.738552  |
| 30 | 1 | 0 | 0.736862  | 2.451795  | 1.408235  |
| 31 | 6 | 0 | 3.105374  | 4.218447  | -0.286541 |
| 32 | 1 | 0 | 3.816317  | 3.746287  | -2.264679 |
| 33 | 1 | 0 | 2.180439  | 4.451609  | 1.642642  |
| 34 | 1 | 0 | 3.734472  | 5.097068  | -0.181283 |
| 35 | 1 | 0 | 0.965969  | 0.177302  | -1.620418 |
| 36 | 6 | 0 | -1.378320 | 2.156843  | -0.463292 |
| 37 | 7 | 0 | -1.890581 | 3.146718  | -0.139465 |
| 38 | 6 | 0 | -1.388584 | 0.297597  | -2.077750 |
| 39 | 8 | 0 | -0.808985 | -0.625777 | -2.625661 |
| 40 | 6 | 0 | -2.699744 | 0.838159  | -2.599173 |
| 41 | 1 | 0 | -3.431485 | 0.960881  | -1.794981 |
| 42 | 1 | 0 | -2.534159 | 1.826389  | -3.043130 |
| 43 | 1 | 0 | -3.085166 | 0.154263  | -3.356053 |

|    |   |   |           |           |           |
|----|---|---|-----------|-----------|-----------|
| 44 | 6 | 0 | 2.615309  | -1.627806 | -0.976557 |
| 45 | 1 | 0 | 1.725134  | -2.086487 | -1.408281 |
| 46 | 1 | 0 | 2.890845  | -0.751385 | -1.567857 |
| 47 | 6 | 0 | 3.409898  | -0.178995 | 0.805992  |
| 48 | 1 | 0 | 3.316274  | 0.746484  | 0.241370  |
| 49 | 1 | 0 | 3.258370  | 0.042377  | 1.865803  |
| 50 | 6 | 0 | 2.291256  | -2.247126 | 1.404363  |
| 51 | 1 | 0 | 1.886022  | -1.845185 | 2.335297  |
| 52 | 1 | 0 | 1.614024  | -3.009708 | 1.026743  |
| 53 | 7 | 0 | 4.546562  | -2.343339 | 0.400892  |
| 54 | 6 | 0 | 4.749686  | -0.902069 | 0.526228  |
| 55 | 1 | 0 | 5.454243  | -0.703203 | 1.338578  |
| 56 | 1 | 0 | 5.199141  | -0.533546 | -0.400757 |
| 57 | 6 | 0 | 3.799019  | -2.607820 | -0.832209 |
| 58 | 1 | 0 | 4.466946  | -2.506558 | -1.692189 |
| 59 | 1 | 0 | 3.440599  | -3.641141 | -0.805248 |
| 60 | 6 | 0 | 3.734844  | -2.780646 | 1.535860  |
| 61 | 1 | 0 | 3.717234  | -3.873267 | 1.568186  |
| 62 | 1 | 0 | 4.212095  | -2.427328 | 2.455095  |
| 63 | 7 | 0 | 2.281244  | -1.103050 | 0.403315  |
| 64 | 6 | 0 | -0.234652 | -2.551781 | -0.188086 |
| 65 | 7 | 0 | -0.110735 | -3.622605 | -0.643050 |

---

## 10. NMR spectra and HPLC chromatograms

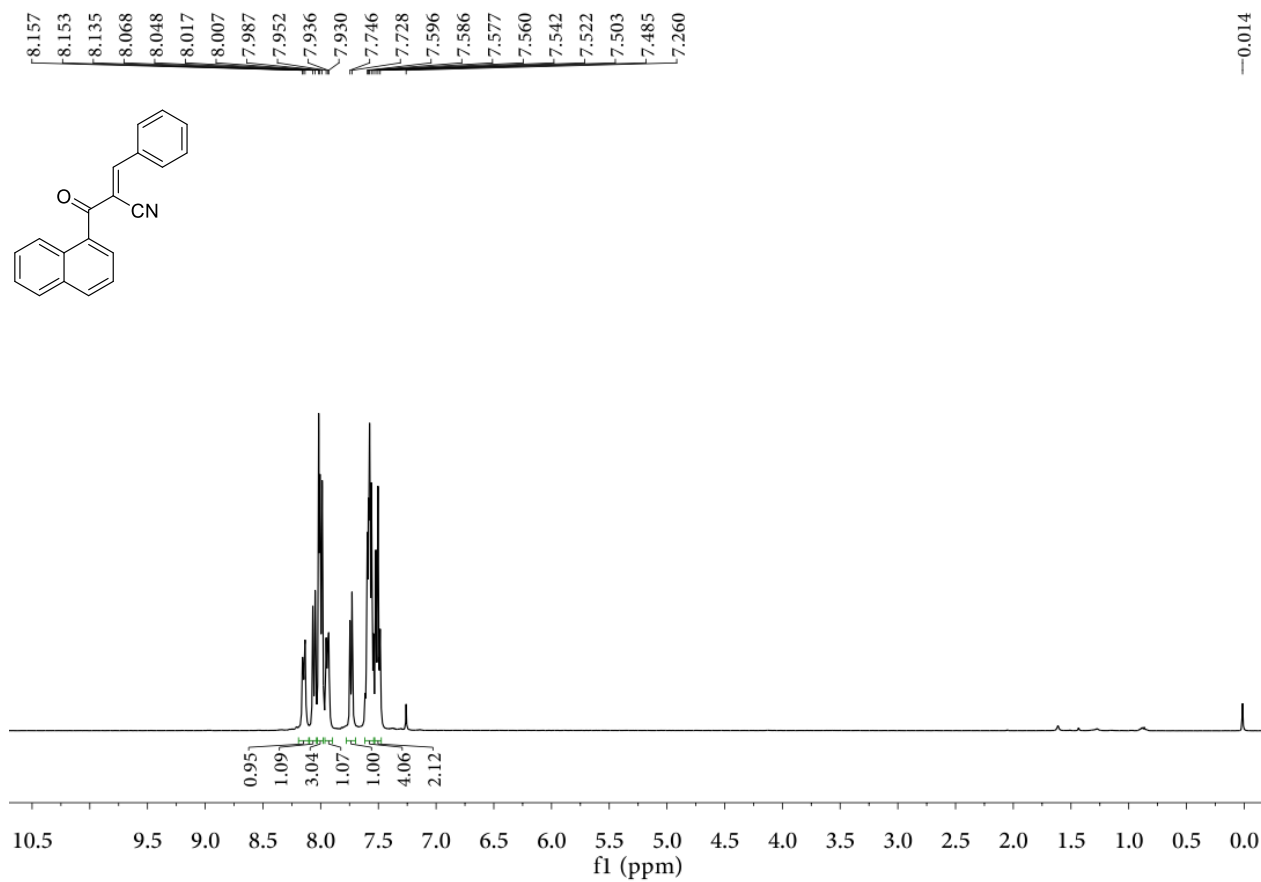

—0.014

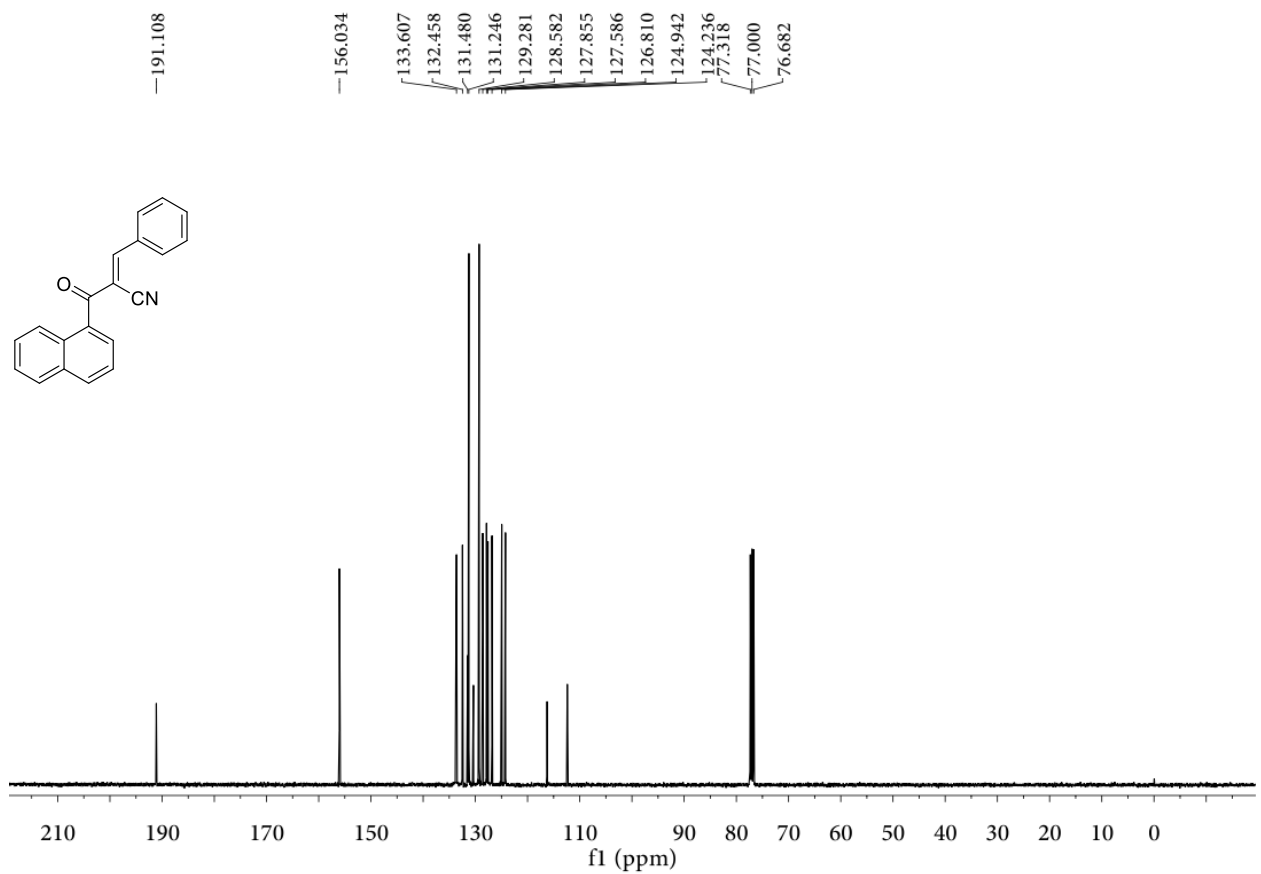

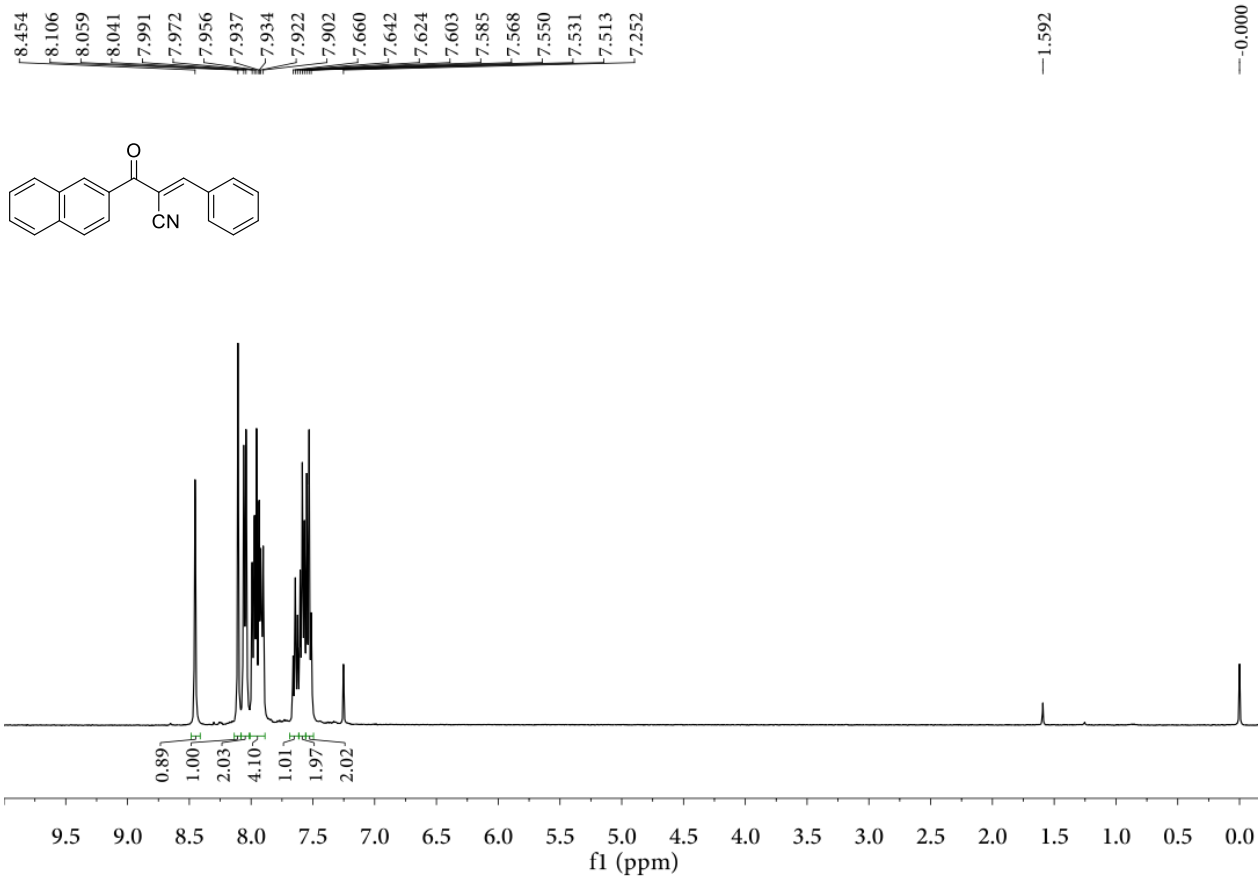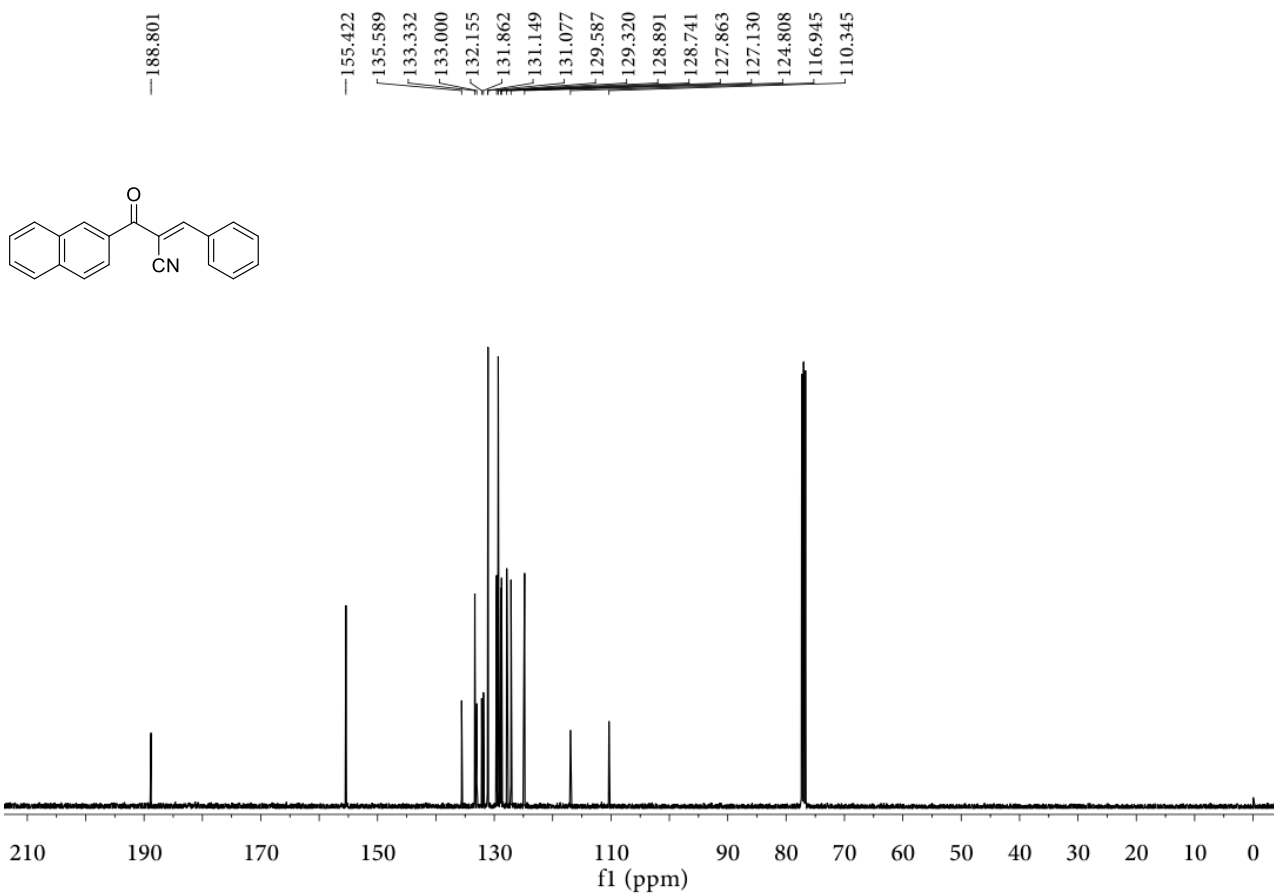

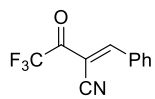

8.367  
8.129  
8.110  
7.708  
7.690  
7.672  
7.604  
7.585  
7.566  
7.260

—0.002

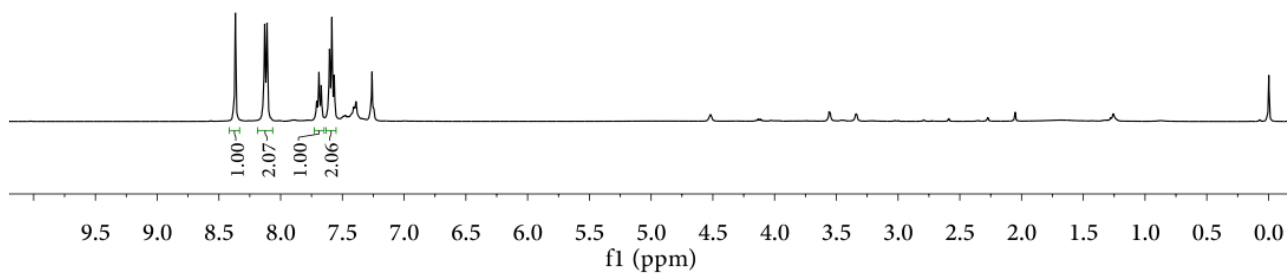

176.166  
175.921  
175.675  
175.429  
159.188  
159.182  
135.479  
132.406  
130.906  
129.701  
118.695  
116.770  
114.845  
113.838  
112.919  
103.502  
77.212  
77.000  
76.788

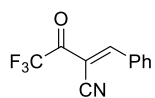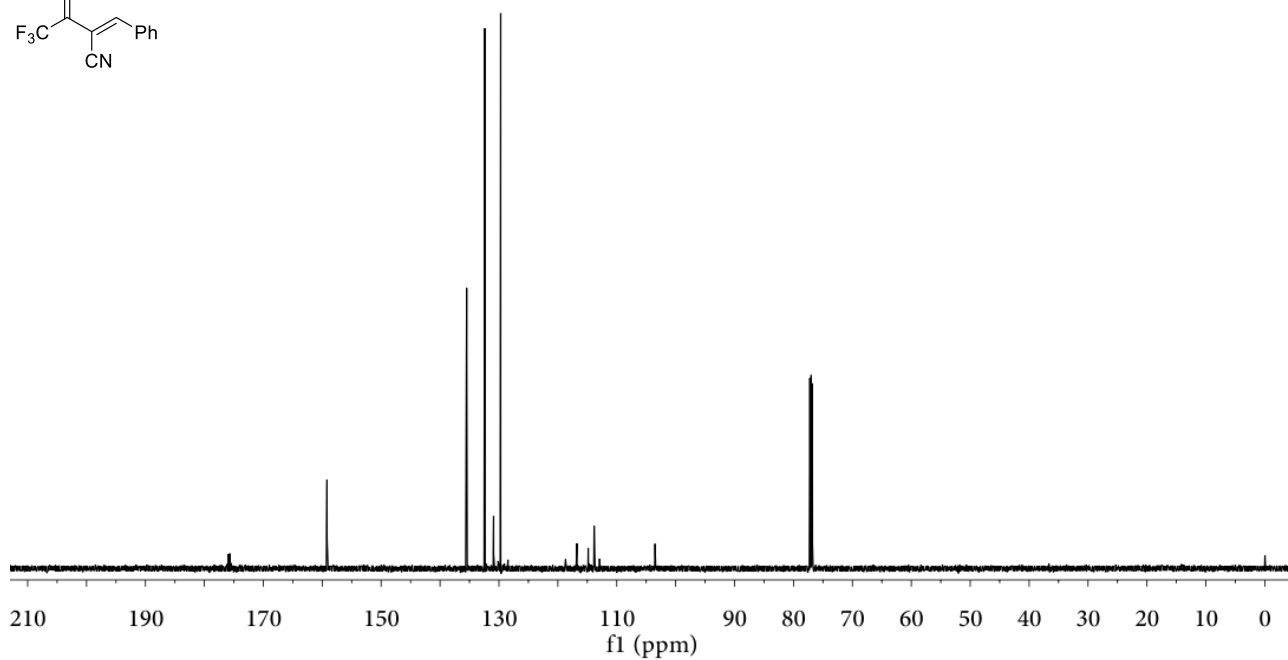

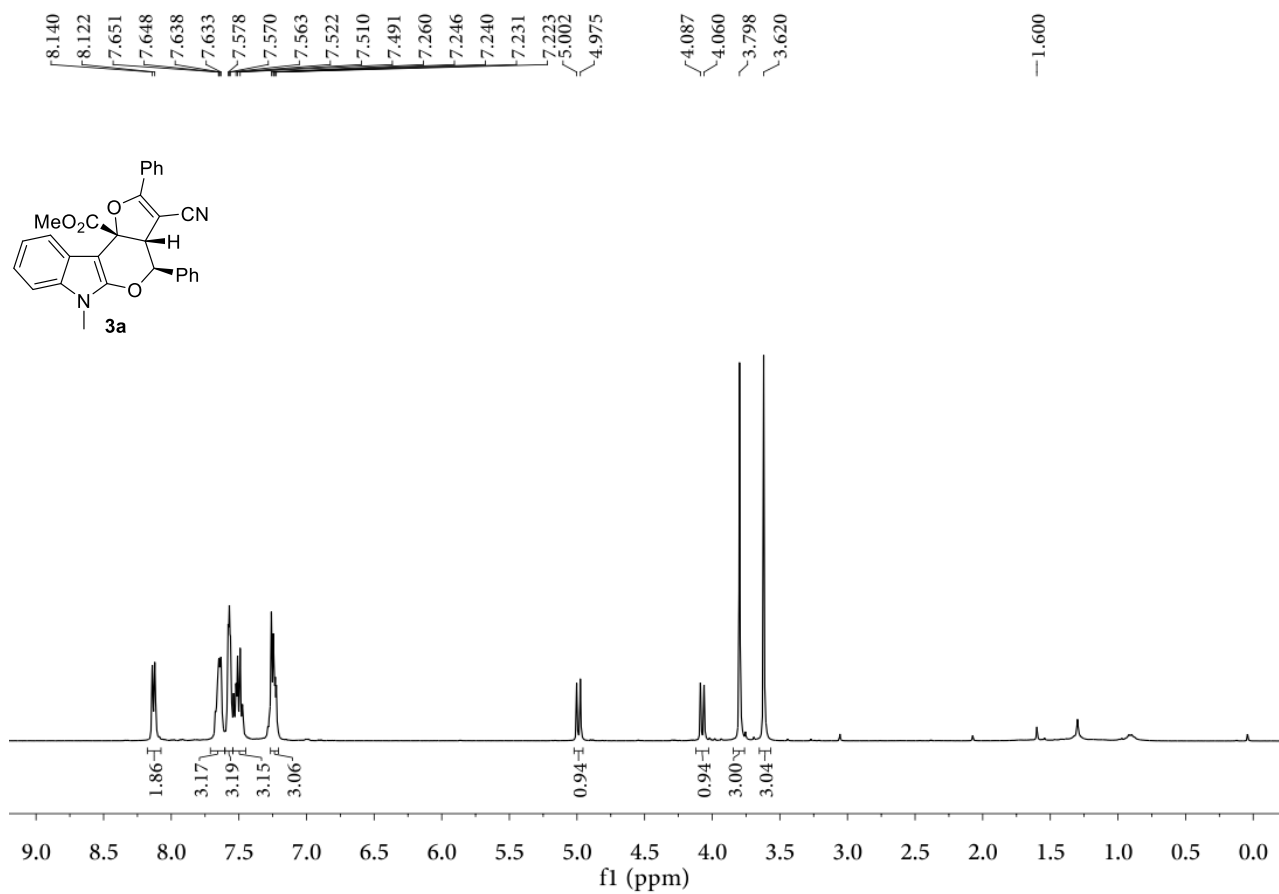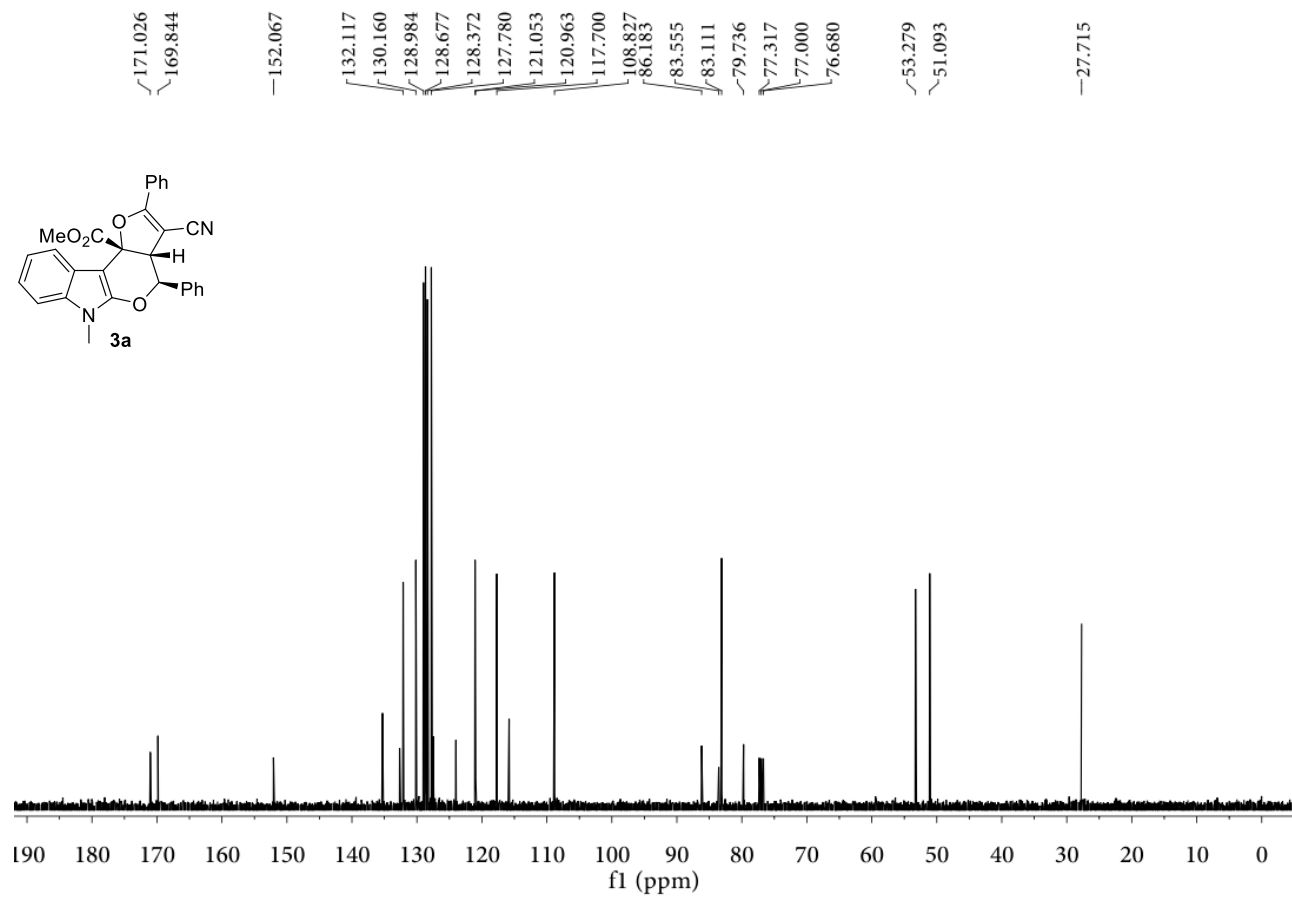

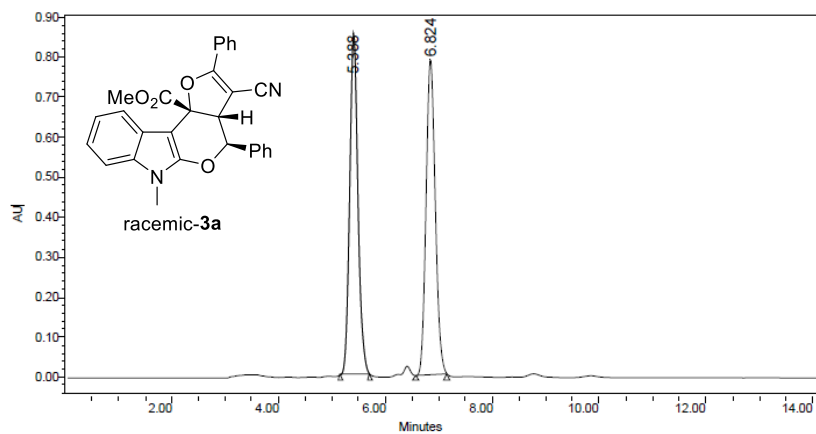

|   | RT (min) | Area (*sec) | % Area | Height ( ) | % Height |
|---|----------|-------------|--------|------------|----------|
| 1 | 5.388    | 9152528     | 49.10  | 854109     | 51.90    |
| 2 | 6.824    | 9488979     | 50.90  | 791659     | 48.10    |

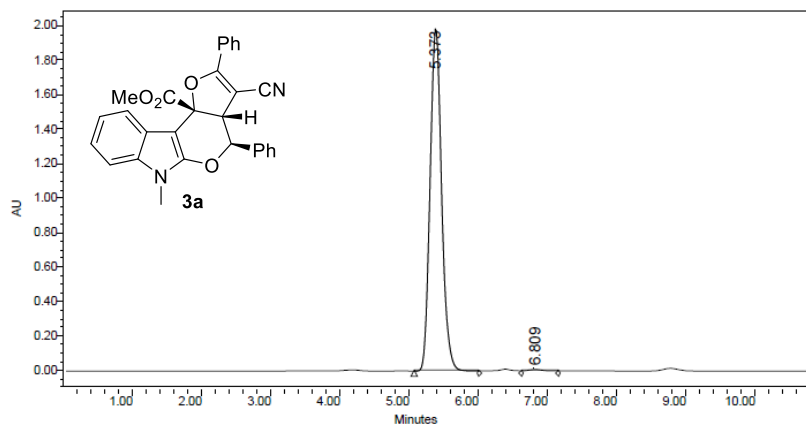

|   | RT (min) | Area (*sec) | % Area | Height ( ) | % Height |
|---|----------|-------------|--------|------------|----------|
| 1 | 5.373    | 23091772    | 99.47  | 1991730    | 99.51    |
| 2 | 6.809    | 123363      | 0.53   | 9711       | 0.49     |

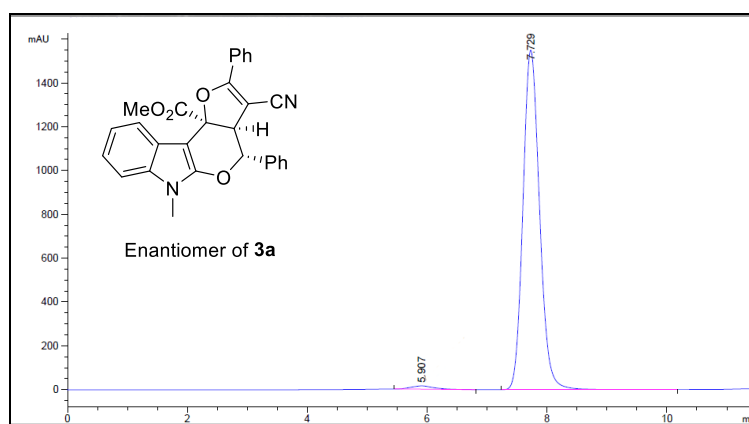

| Peak # | RetTime [min] | Type | Width [min] | Area mAU *s | Height [mAU] | Area %  |
|--------|---------------|------|-------------|-------------|--------------|---------|
| 1      | 5.907         | MM   | 0.4295      | 379.61414   | 14.73107     | 1.2591  |
| 2      | 7.729         | BV   | 0.3001      | 2.97702e4   | 1547.93909   | 98.7409 |

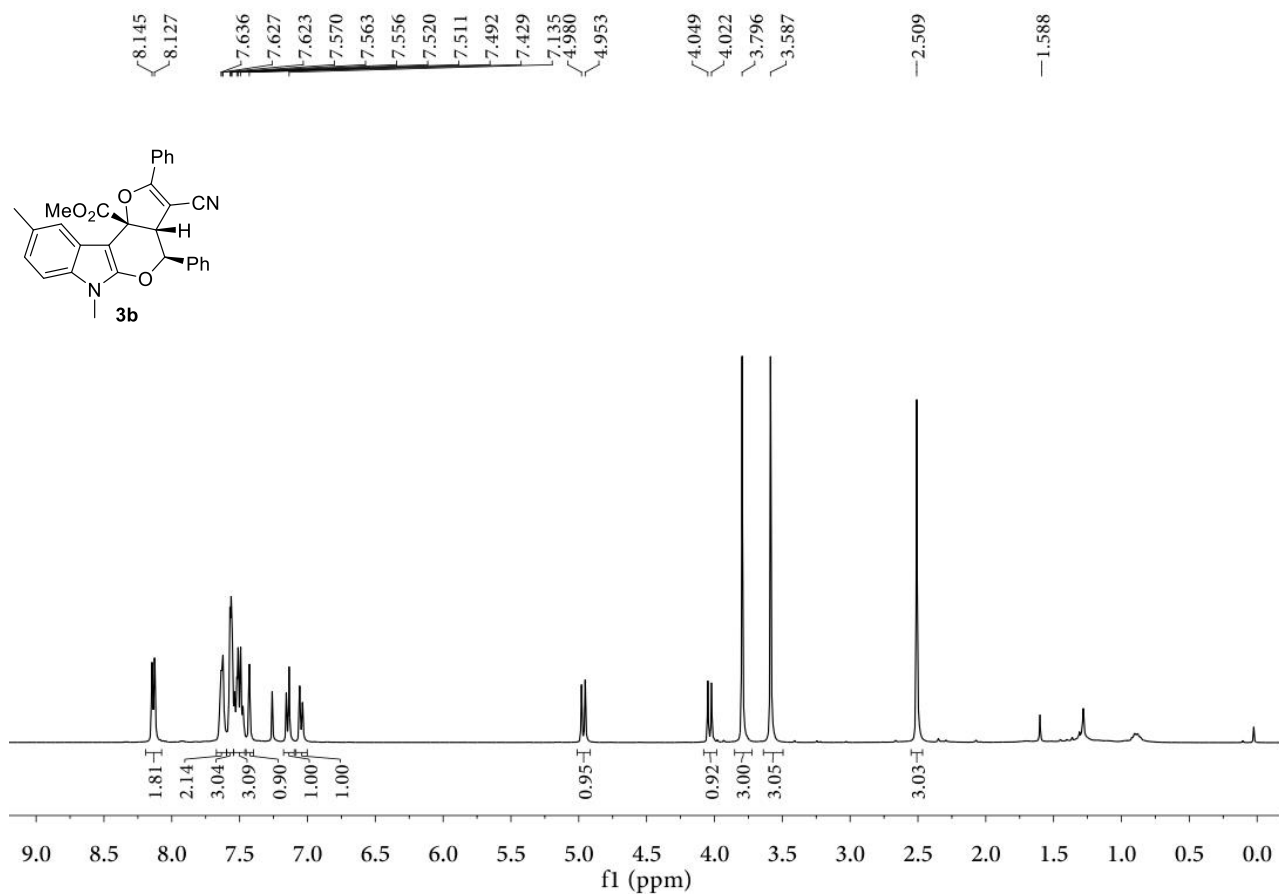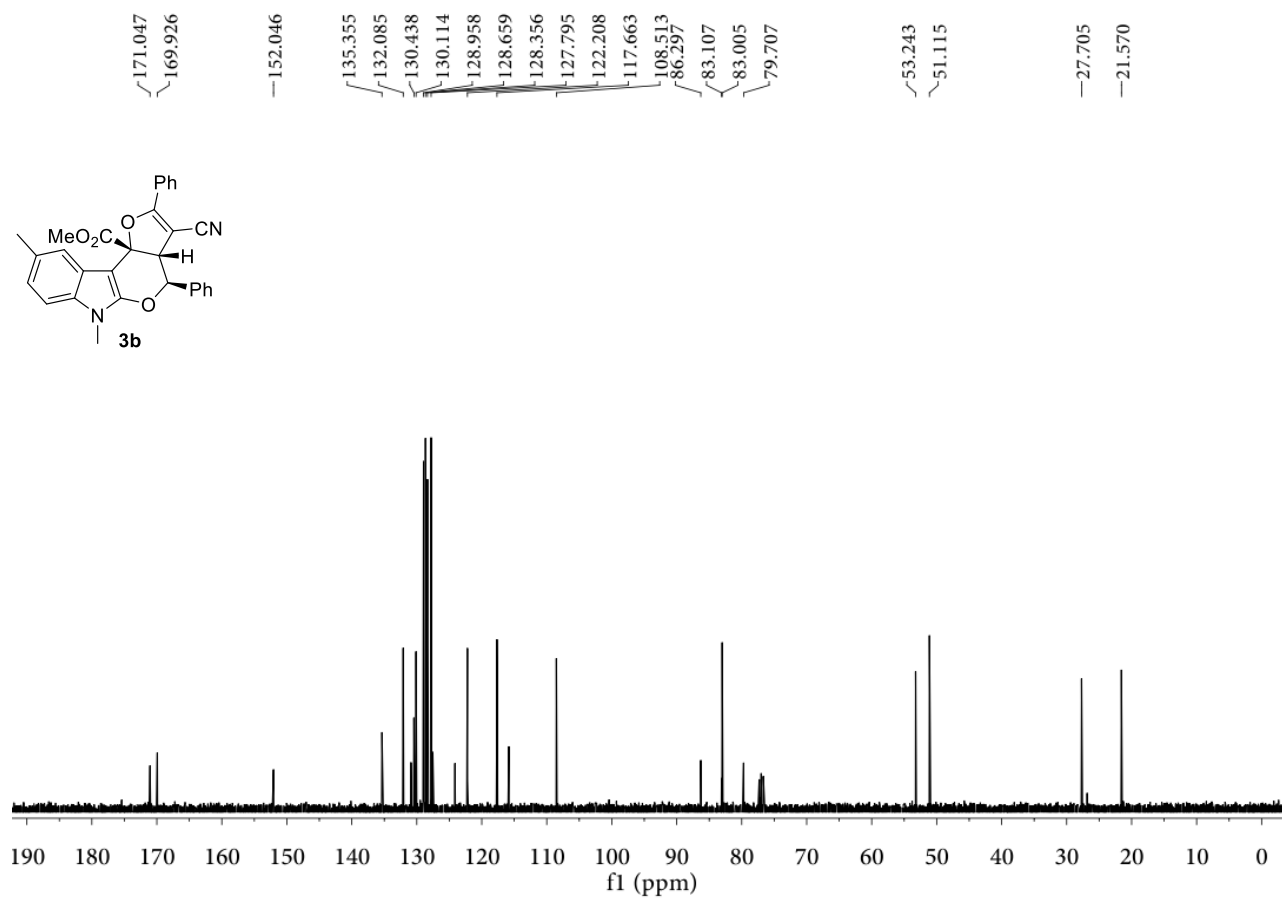



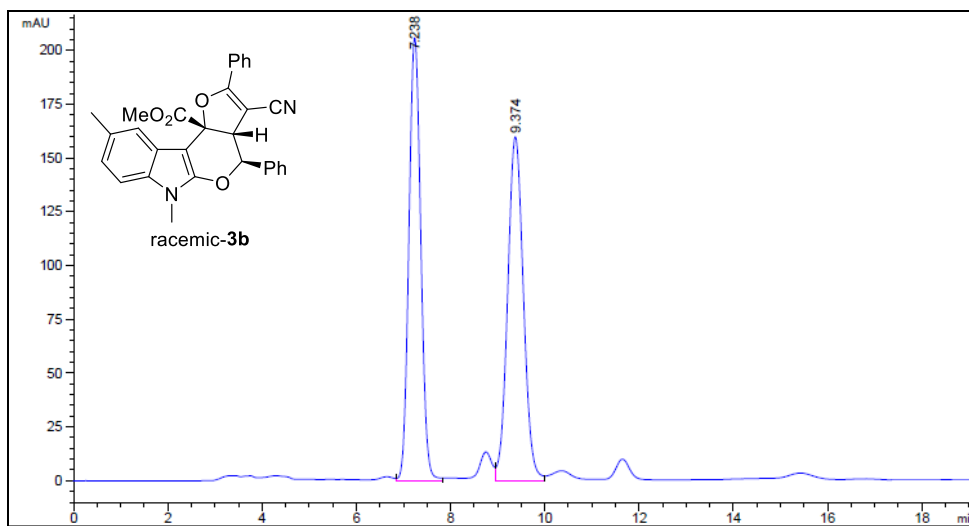

| Peak # | RetTime [min] | Type | Width [min] | Area mAU   | Area *s | Height [mAU] | Area %  |
|--------|---------------|------|-------------|------------|---------|--------------|---------|
| 1      | 7.238         | VV   | 0.2739      | 3595.11816 |         | 205.55402    | 49.2479 |
| 2      | 9.374         | VV   | 0.3640      | 3704.92456 |         | 159.60110    | 50.7521 |

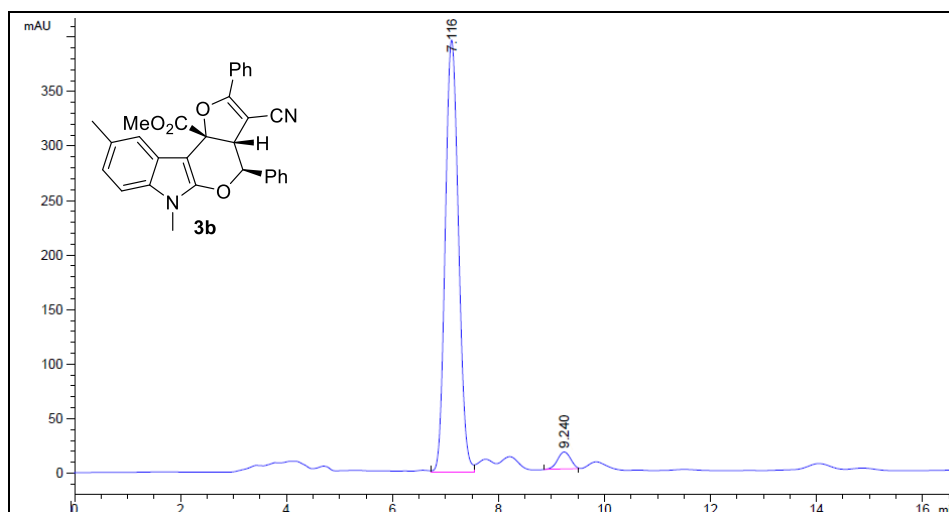

| Peak # | RetTime [min] | Type | Width [min] | Area mAU   | Area *s | Height [mAU] | Area %  |
|--------|---------------|------|-------------|------------|---------|--------------|---------|
| 1      | 7.116         | VV   | 0.2725      | 6881.36914 |         | 396.31644    | 96.2927 |
| 2      | 9.240         | MM   | 0.2830      | 264.93204  |         | 15.60132     | 3.7073  |

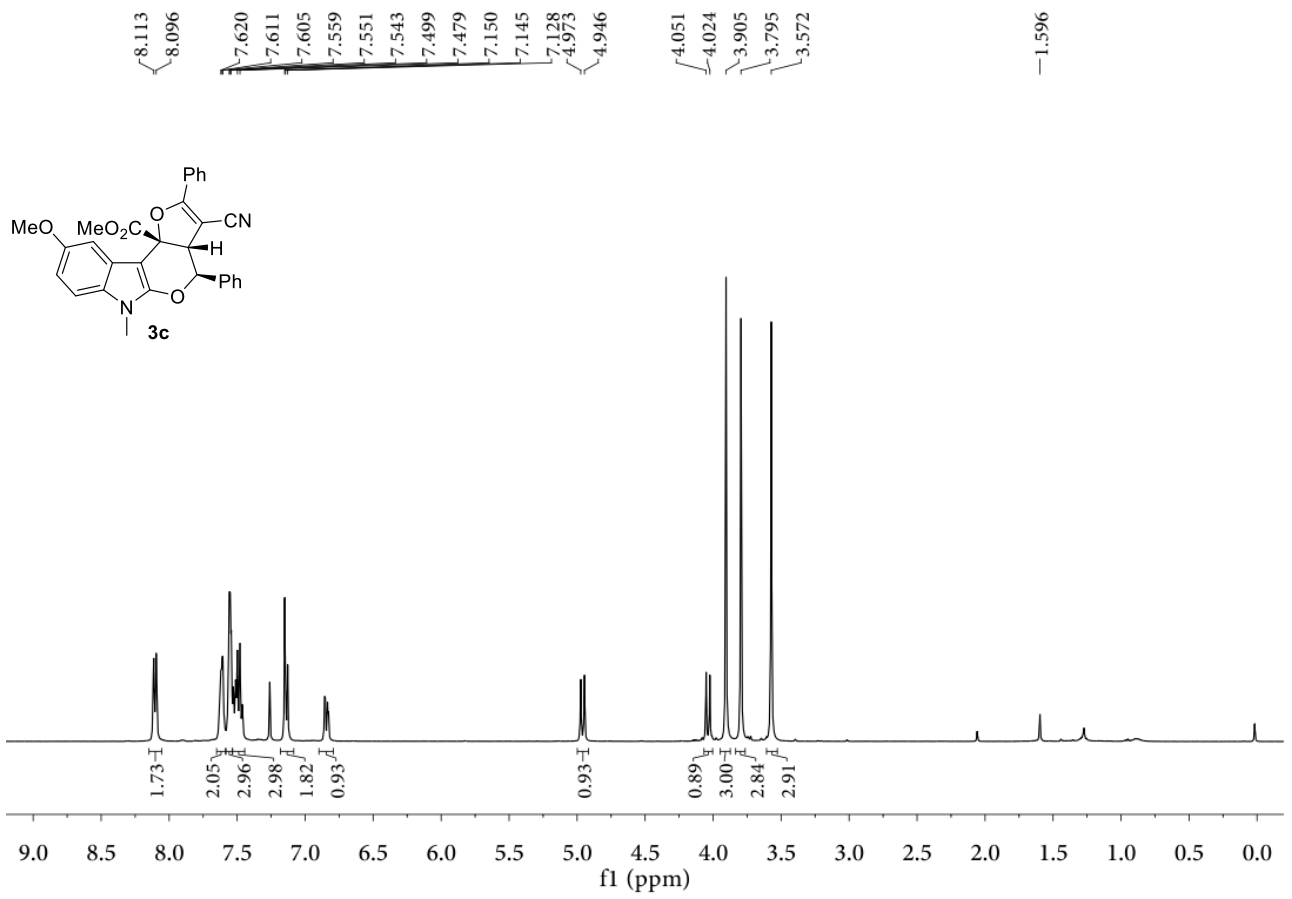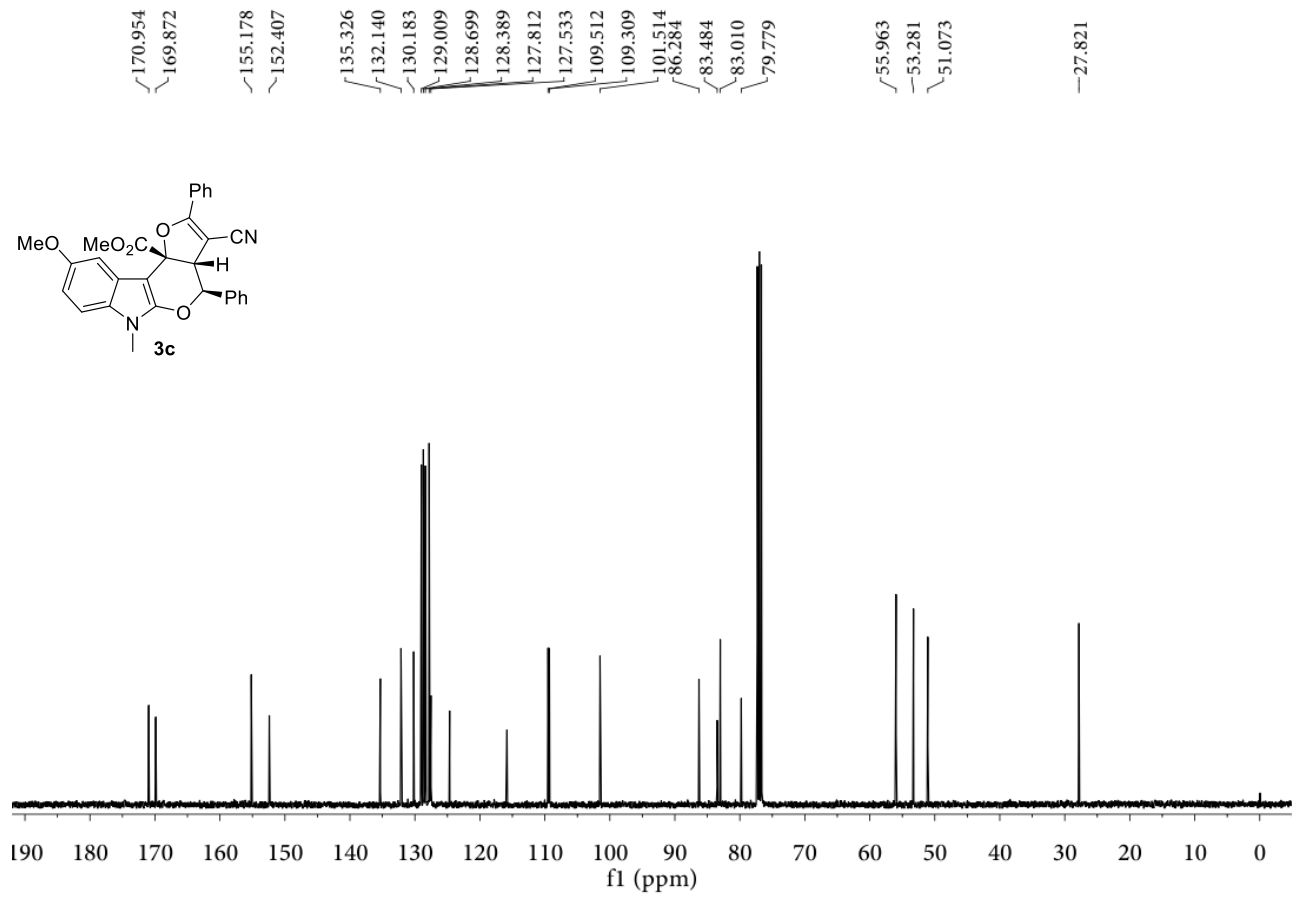

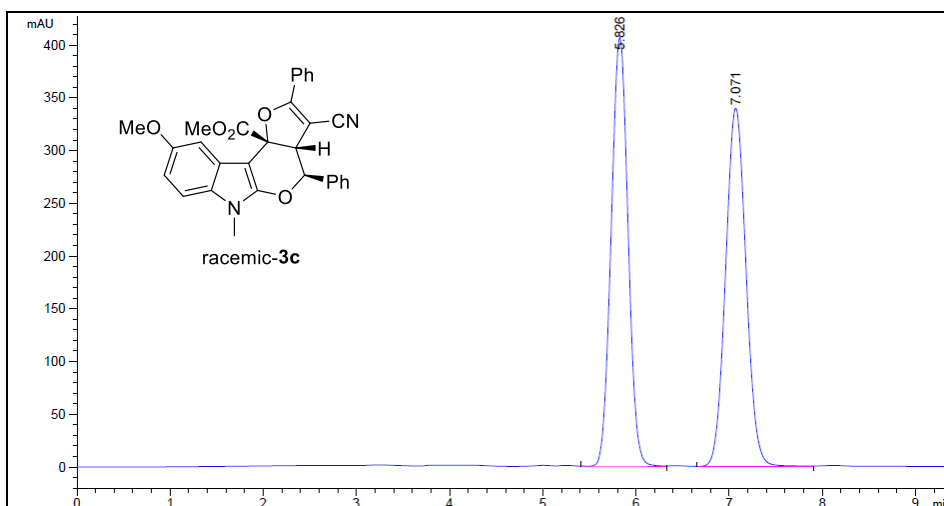

| Peak # | RetTime [min] | Type | Width [min] | Area mAU   | *s | Height [mAU] | Area %  |
|--------|---------------|------|-------------|------------|----|--------------|---------|
| 1      | 5.826         | VV   | 0.1998      | 5129.66553 |    | 406.00278    | 49.7448 |
| 2      | 7.071         | VB   | 0.2422      | 5182.30322 |    | 339.35944    | 50.2552 |

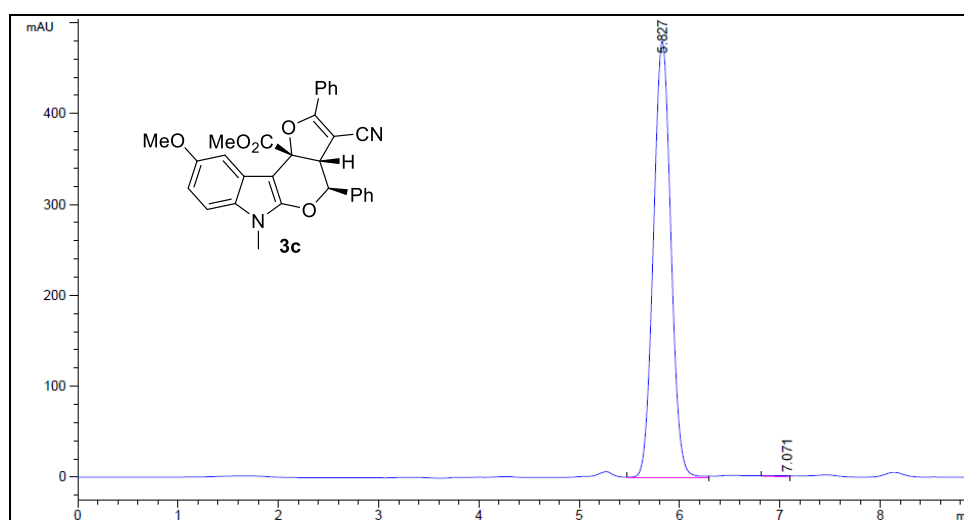

| Peak # | RetTime [min] | Type | Width [min] | Area mAU   | *s | Height [mAU] | Area %  |
|--------|---------------|------|-------------|------------|----|--------------|---------|
| 1      | 5.827         | VV   | 0.1885      | 5829.83594 |    | 479.25140    | 99.7147 |
| 2      | 7.071         | MM   | 0.2319      | 16.67862   |    | 1.19846      | 0.2853  |

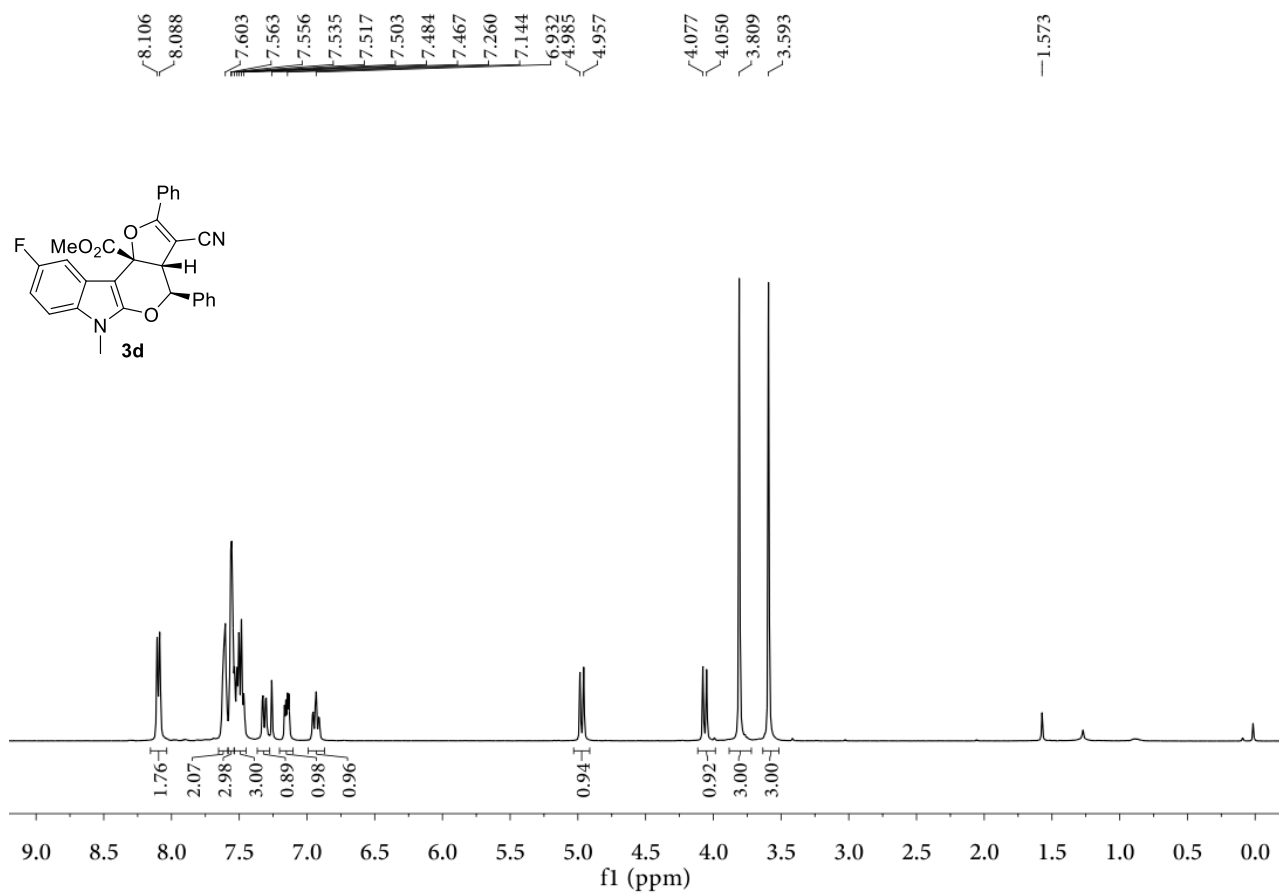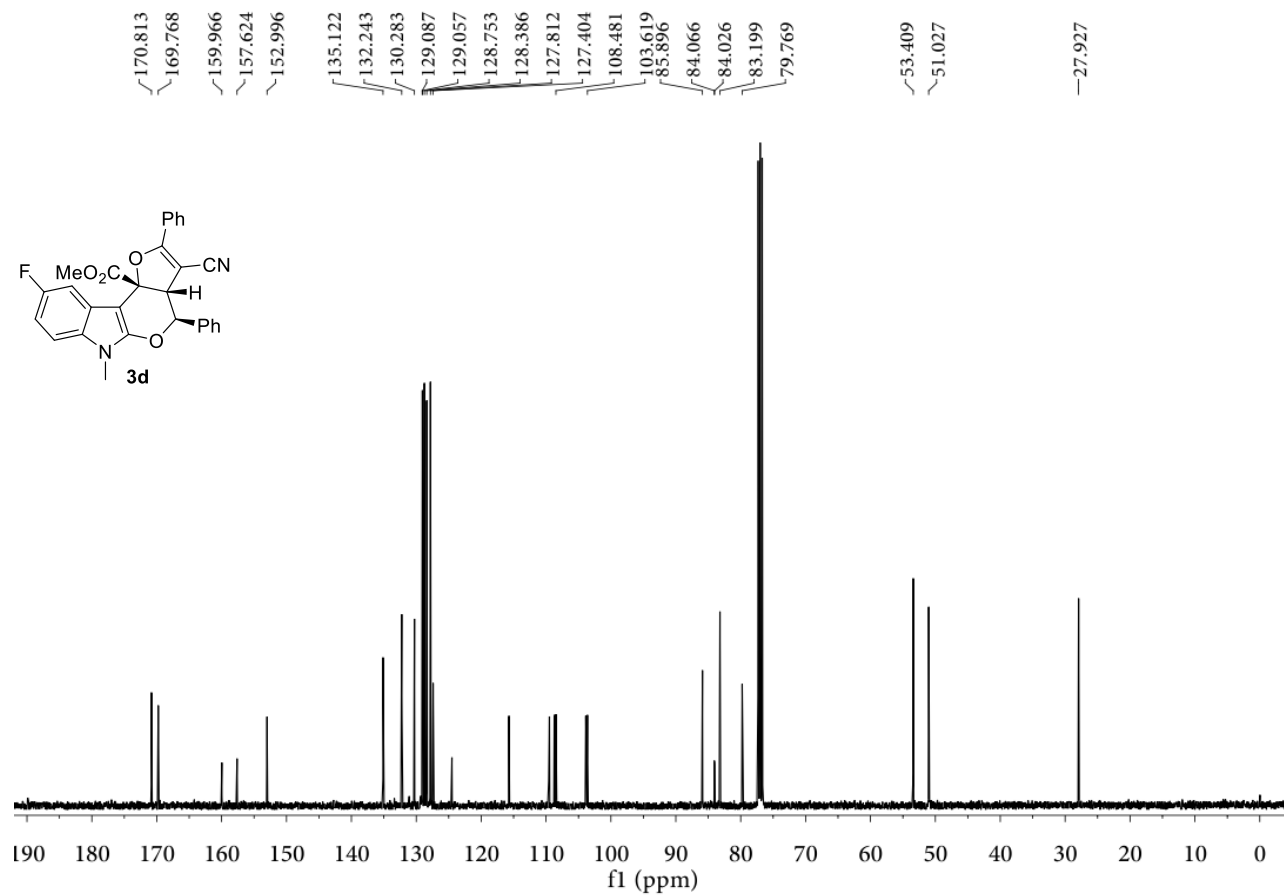

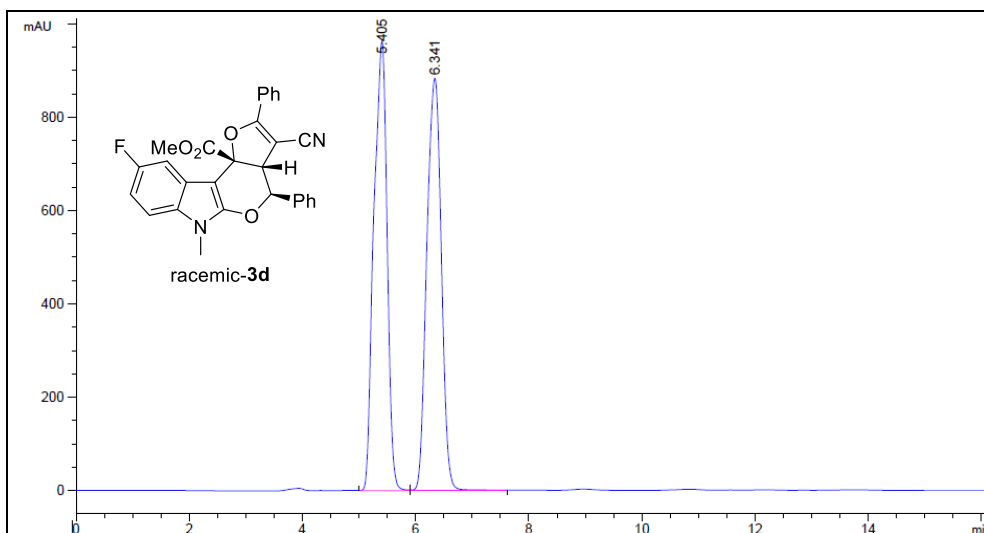

| Peak # | RetTime [min] | Type | Width [min] | Area mAU *s | Height [mAU] | Area %  |
|--------|---------------|------|-------------|-------------|--------------|---------|
| 1      | 5.405         | VV   | 0.2306      | 1.56445e4   | 961.35602    | 49.8902 |
| 2      | 6.341         | VB   | 0.2952      | 1.57134e4   | 882.20856    | 50.1098 |

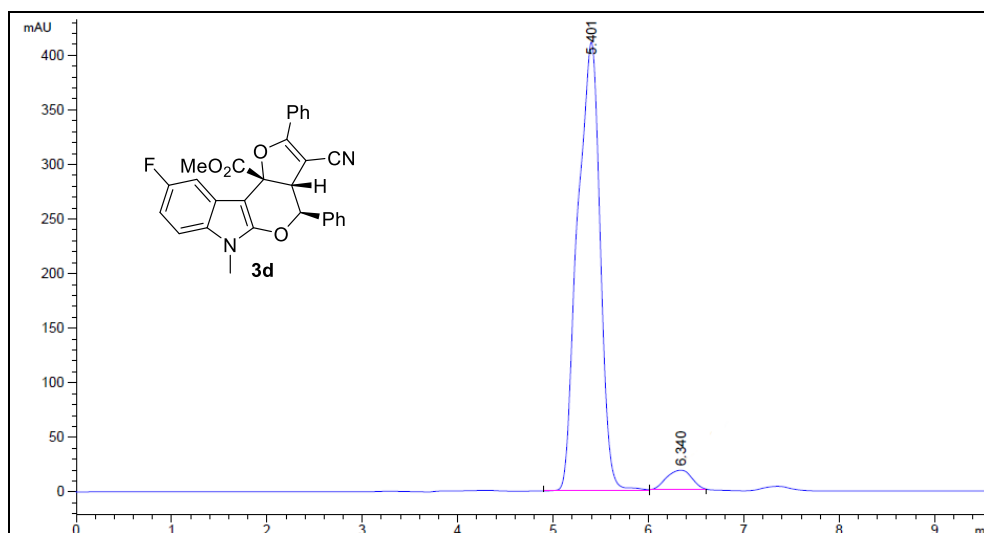

| Peak # | RetTime [min] | Type | Width [min] | Area mAU *s | Height [mAU] | Area %  |
|--------|---------------|------|-------------|-------------|--------------|---------|
| 1      | 5.401         | MM   | 0.2737      | 6751.68506  | 411.19461    | 95.3871 |
| 2      | 6.340         | MM   | 0.3041      | 326.51120   | 17.89628     | 4.6129  |

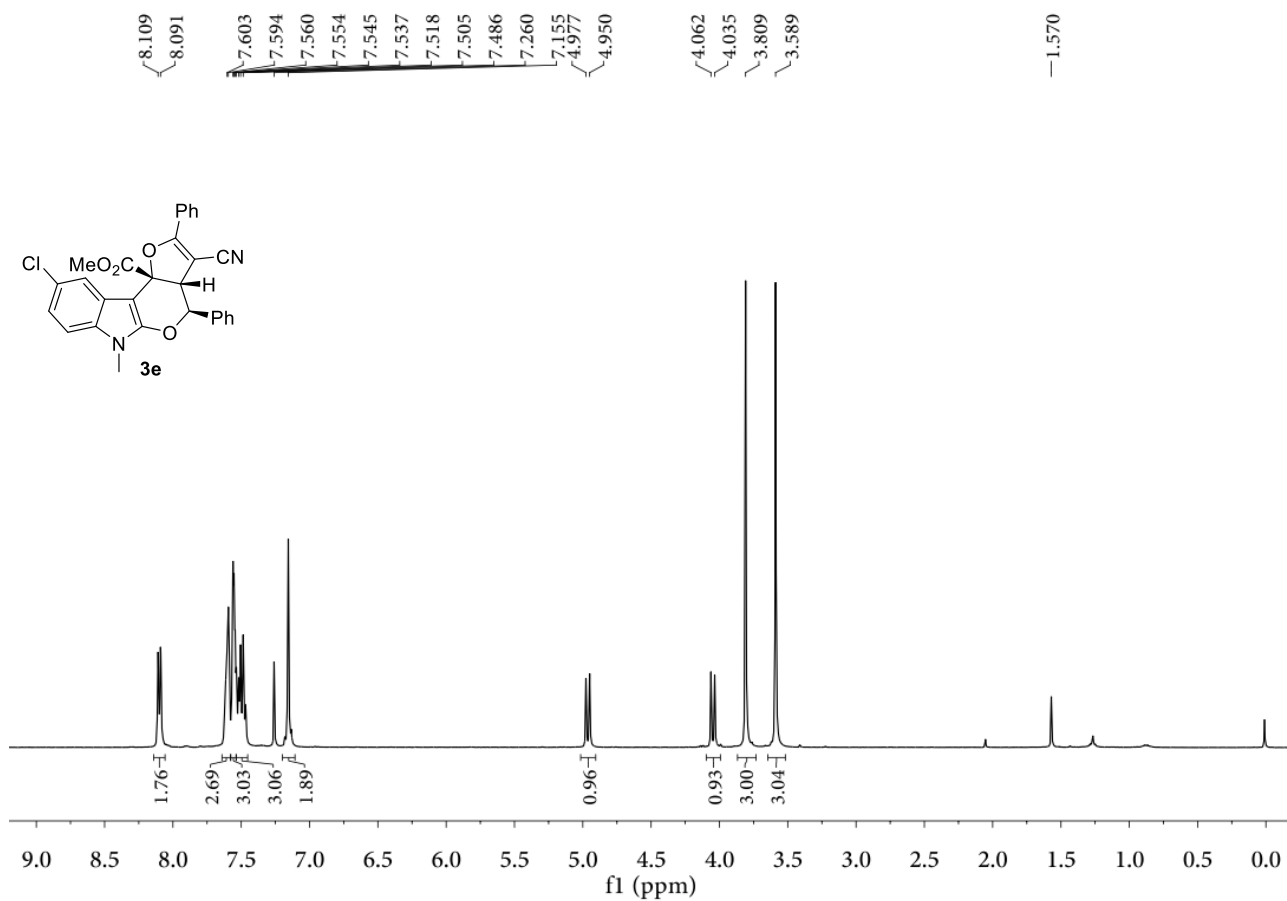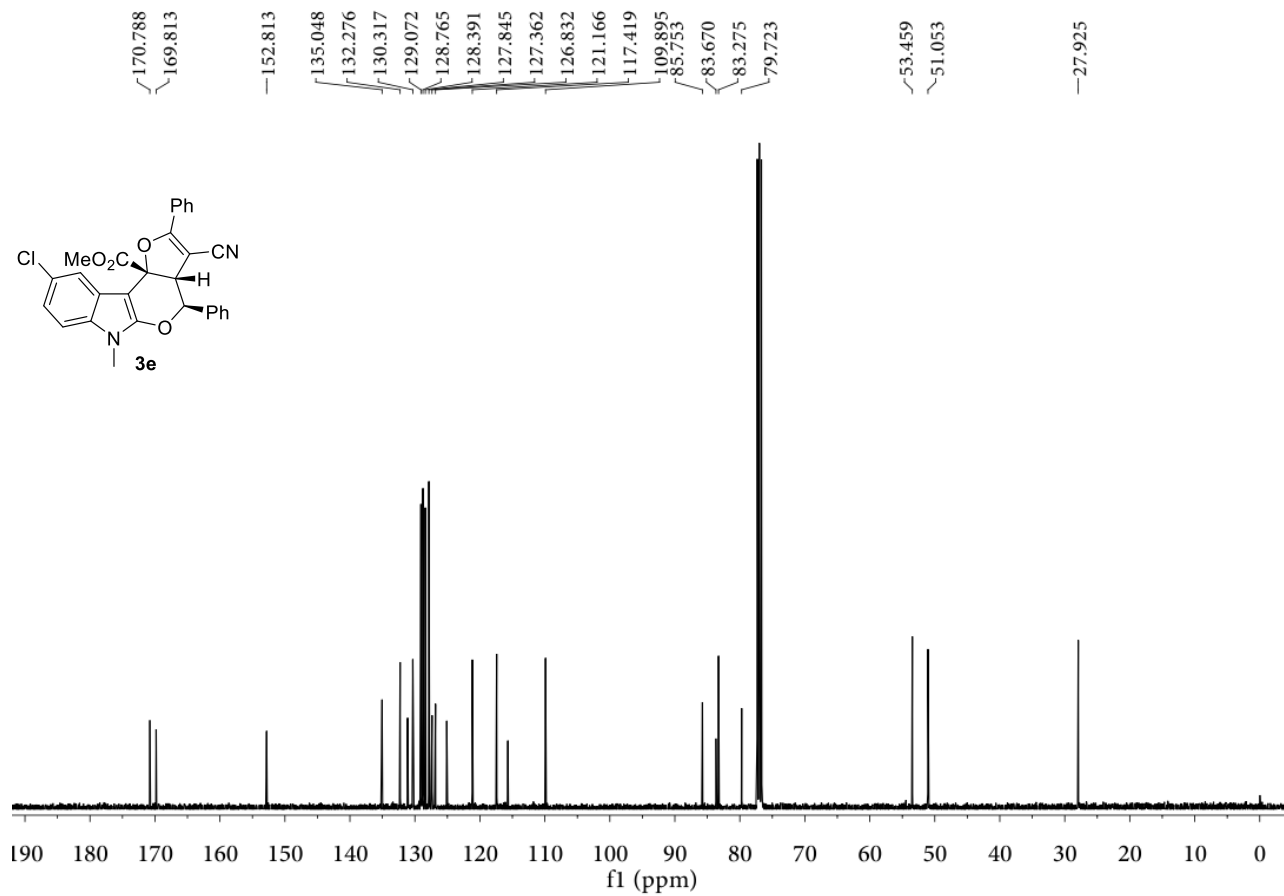

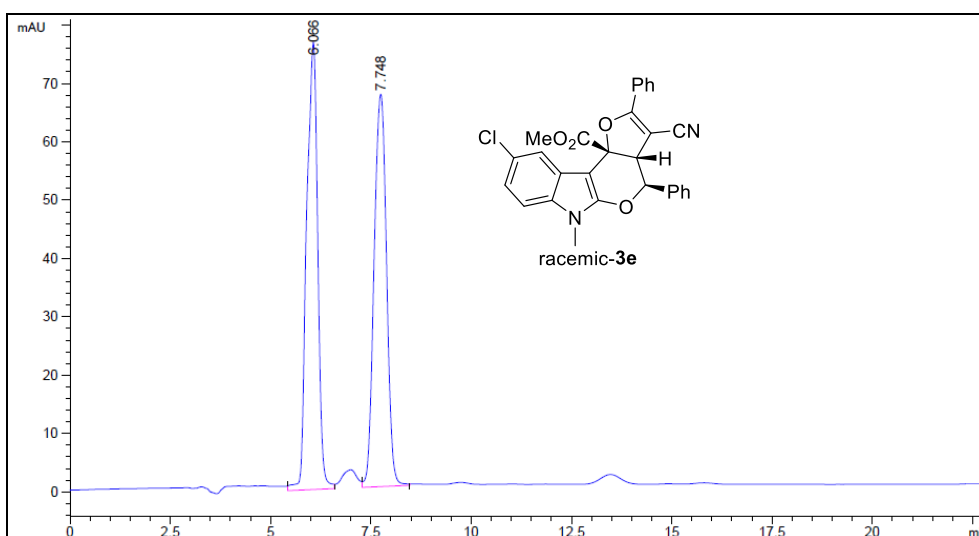

| Peak # | RetTime [min] | Type | Width [min] | Area mAU *s | Height [mAU] | Area %  |
|--------|---------------|------|-------------|-------------|--------------|---------|
| 1      | 6.066         | BV   | 0.2769      | 1473.52661  | 76.57407     | 50.3588 |
| 2      | 7.748         | VB   | 0.3452      | 1452.52710  | 67.24238     | 49.6412 |

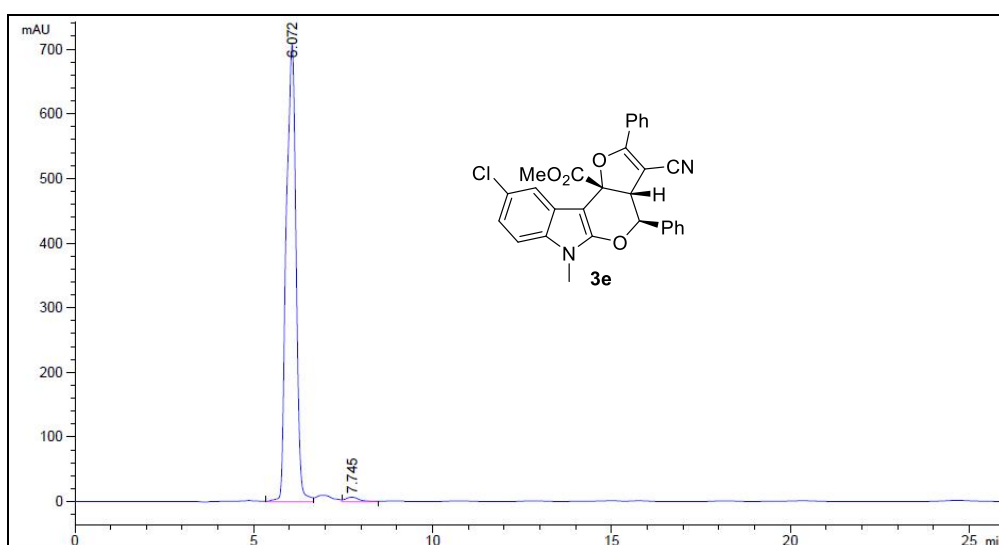

| Peak # | RetTime [min] | Type | Width [min] | Area mAU *s | Height [mAU] | Area %  |
|--------|---------------|------|-------------|-------------|--------------|---------|
| 1      | 6.072         | VV   | 0.2677      | 1.33765e4   | 705.82098    | 98.6291 |
| 2      | 7.745         | VB   | 0.4092      | 185.92235   | 6.86380      | 1.3709  |

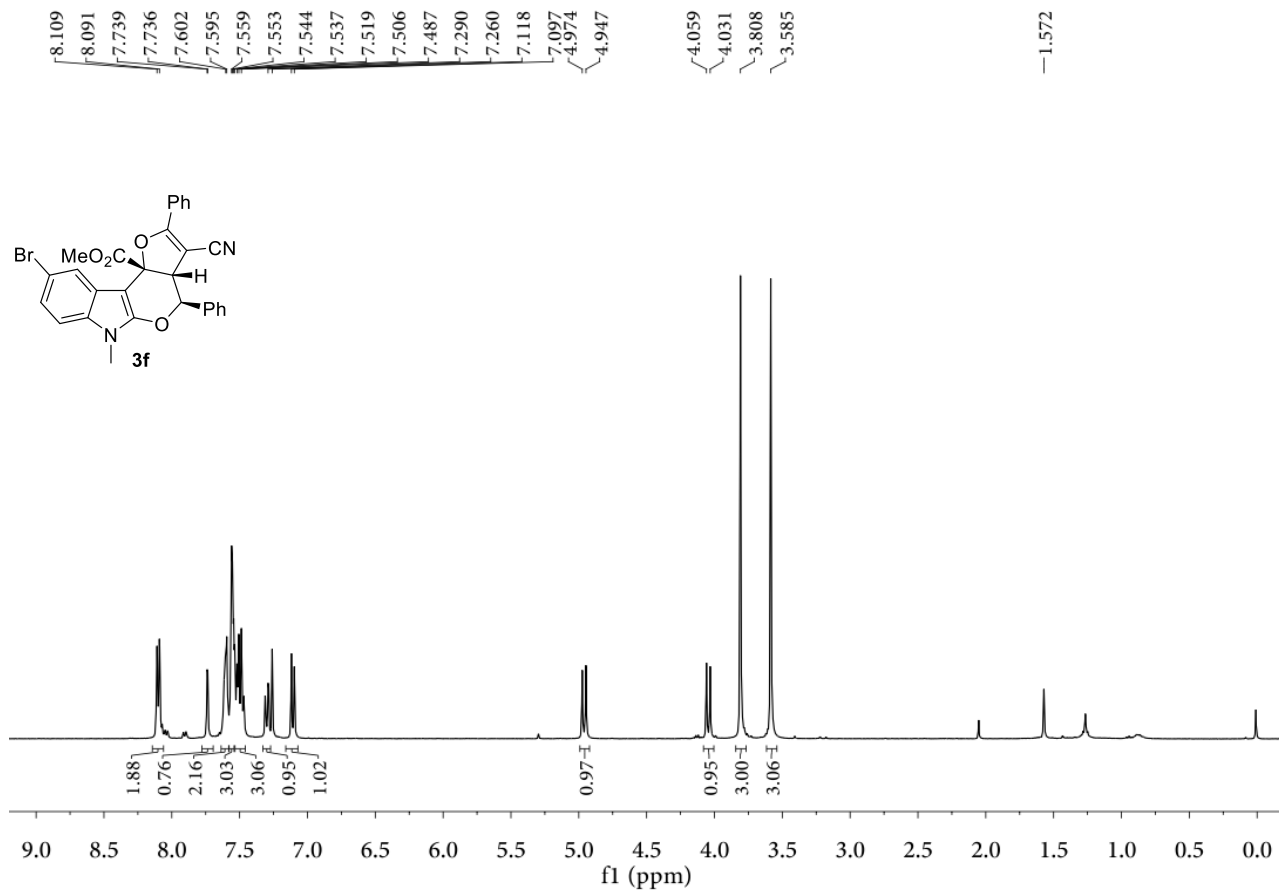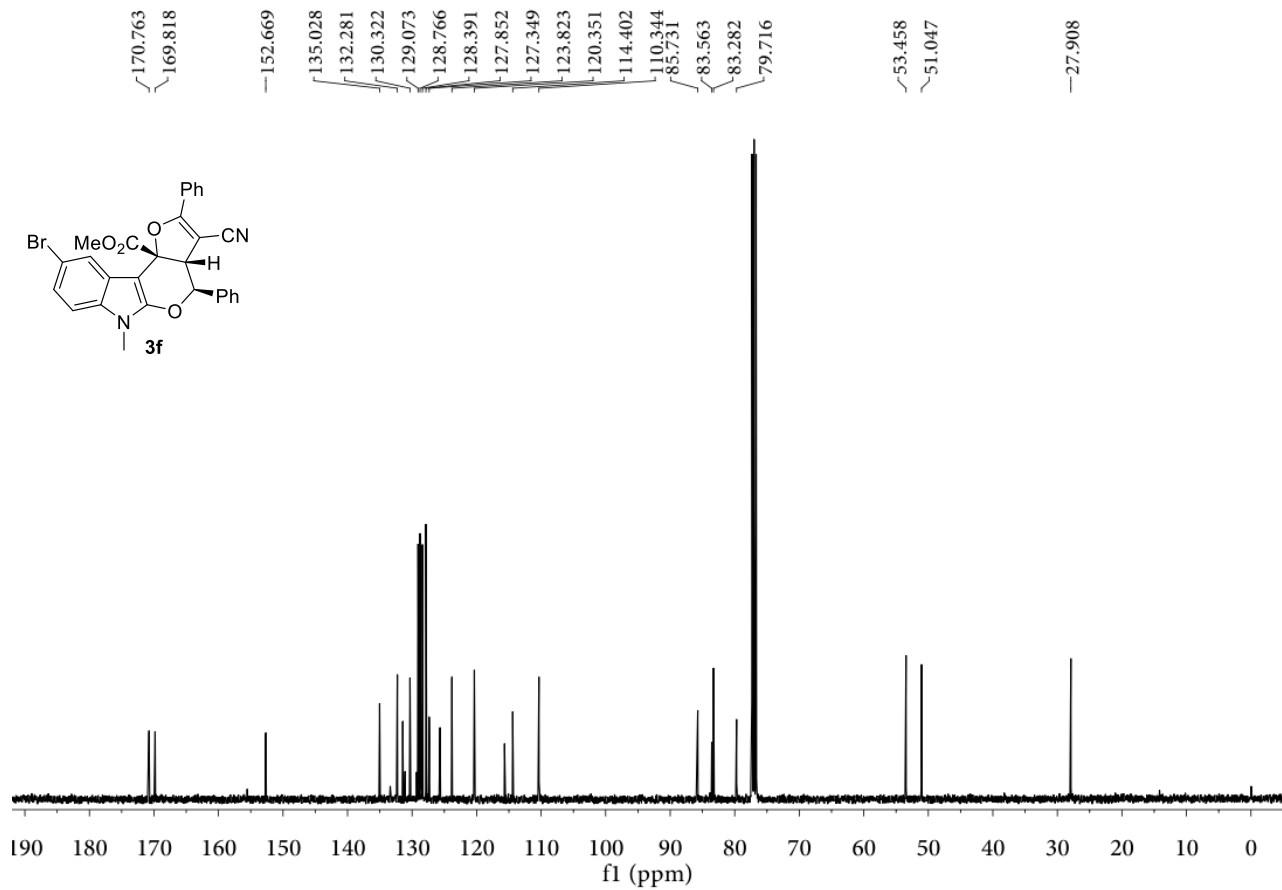



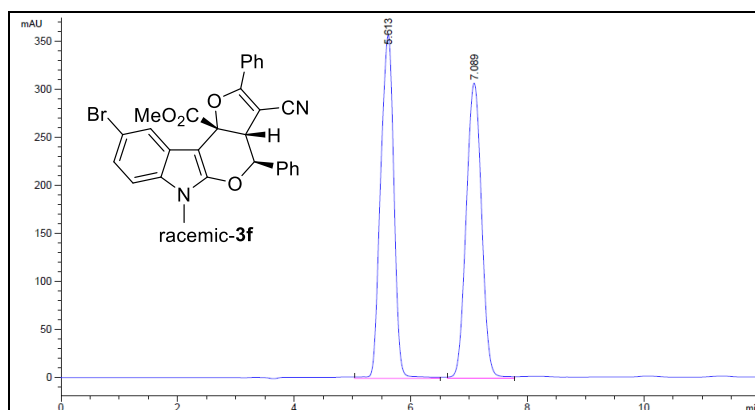

| Peak # | RetTime [min] | Type | Width [min] | Area mAU   | Area *s | Height [mAU] | Area %  |
|--------|---------------|------|-------------|------------|---------|--------------|---------|
| 1      | 5.613         | VB   | 0.2607      | 5655.35498 |         | 356.63089    | 50.1297 |
| 2      | 7.089         | BV   | 0.2957      | 5626.10059 |         | 306.41946    | 49.8703 |

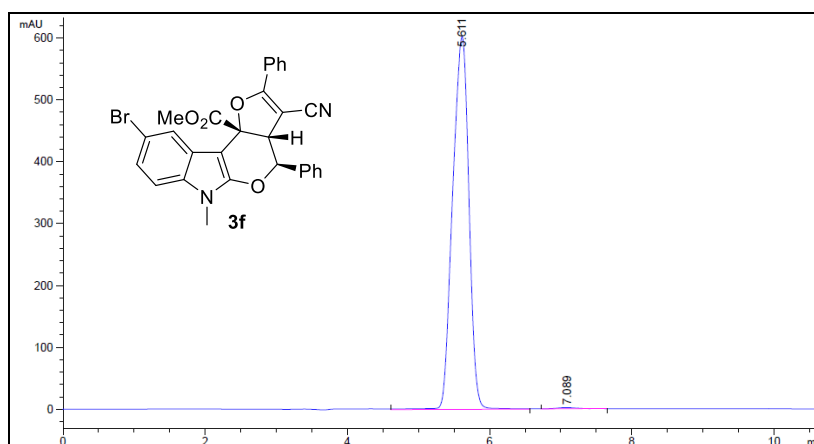

| Peak # | RetTime [min] | Type | Width [min] | Area mAU   | Area *s | Height [mAU] | Area %  |
|--------|---------------|------|-------------|------------|---------|--------------|---------|
| 1      | 5.611         | VB   | 0.2614      | 9592.30859 |         | 602.64075    | 99.6203 |
| 2      | 7.089         | MM   | 0.3263      | 36.55666   |         | 1.86716      | 0.3797  |

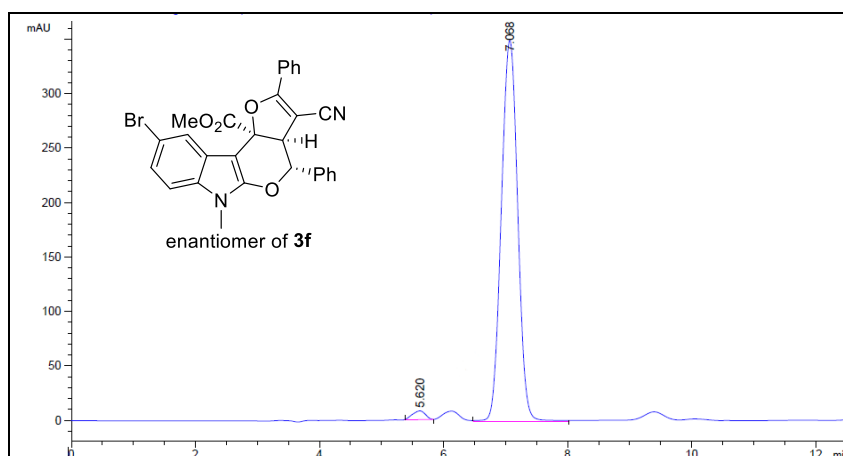

| Peak # | RetTime [min] | Type | Width [min] | Area mAU   | Area *s | Height [mAU] | Area %  |
|--------|---------------|------|-------------|------------|---------|--------------|---------|
| 1      | 5.620         | MM   | 0.2404      | 116.27843  |         | 8.06088      | 1.7762  |
| 2      | 7.068         | VB   | 0.2960      | 6430.11084 |         | 349.73169    | 98.2238 |

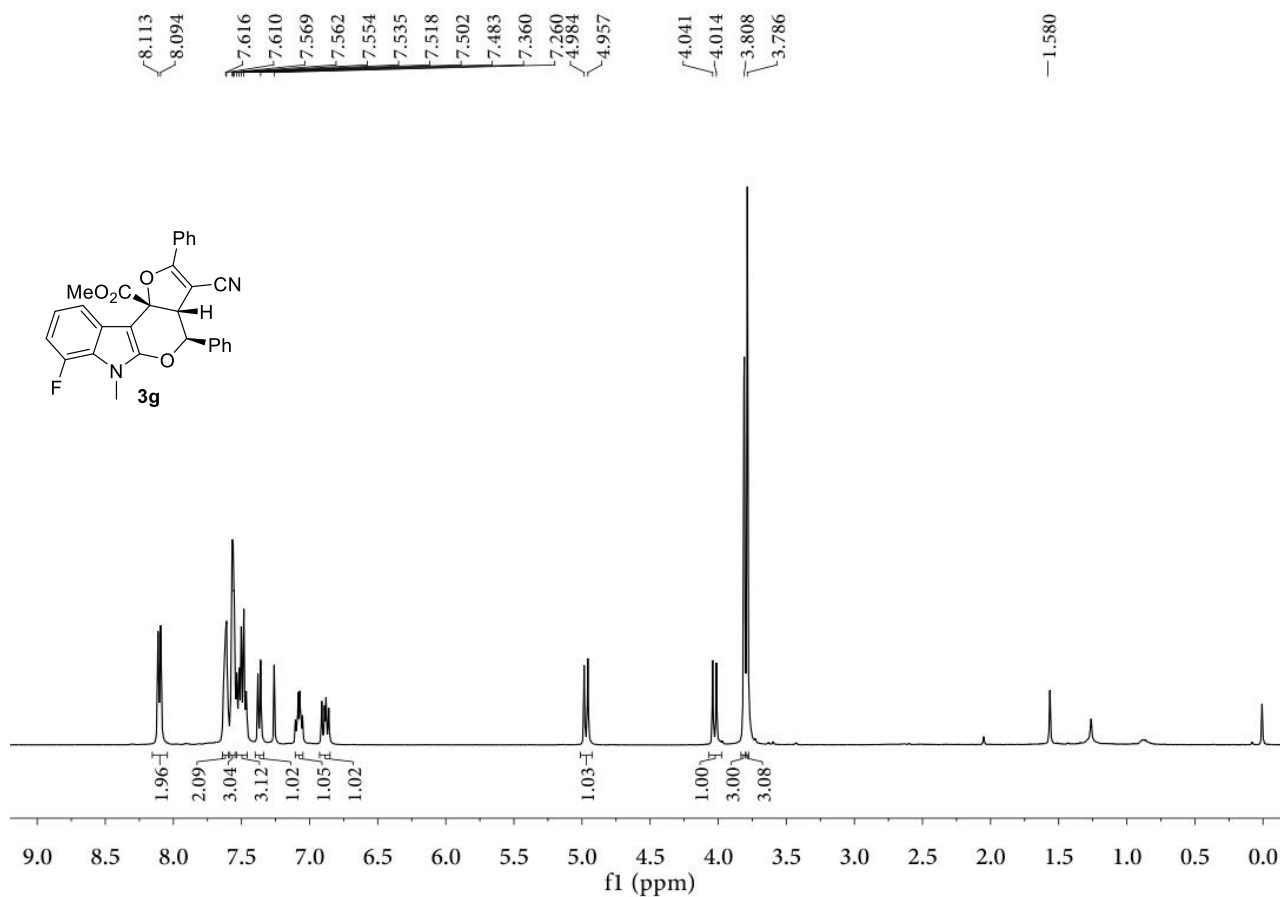

<sup>13</sup>C NMR chemical shifts (ppm): 170.884, 169.864, 155.533, 152.363, 151.107, 148.694, 135.059, 132.229, 130.286, 129.051, 128.730, 128.373, 127.813, 127.402, 113.471, 85.904, 84.600, 84.580, 83.291, 79.727, 53.391, 51.074, 30.376, 30.323.

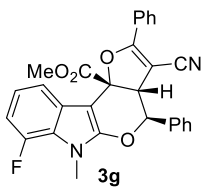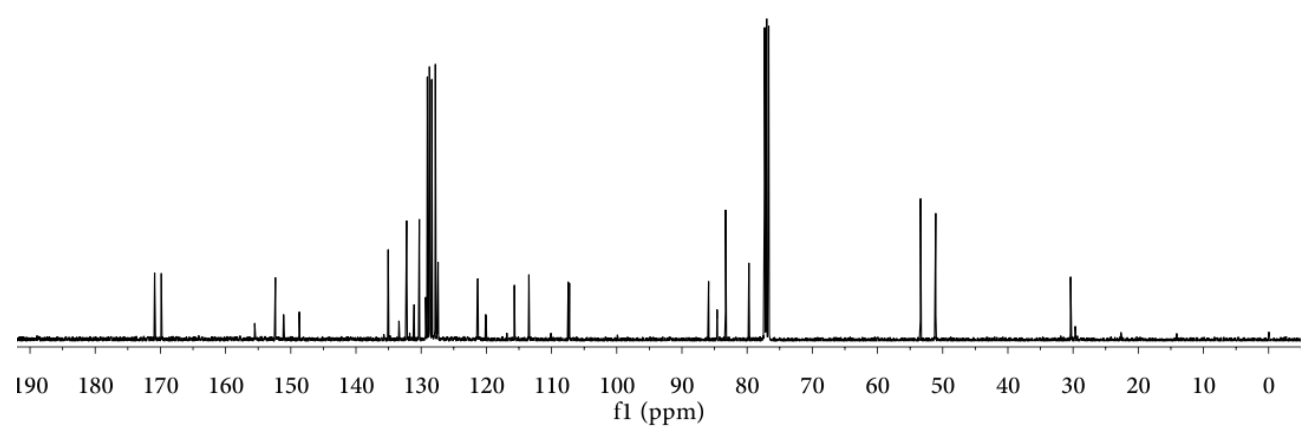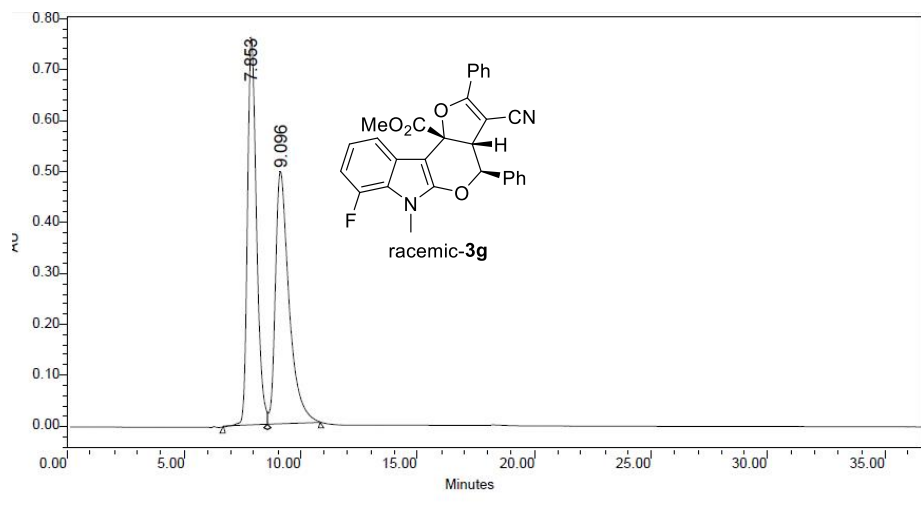

| RT (min) | Area (*sec) | % Area | Height ( ) | % Height |
|----------|-------------|--------|------------|----------|
| 1 7.853  | 20599662    | 50.51  | 759964     | 60.53    |
| 2 9.096  | 20184215    | 49.49  | 495601     | 39.47    |

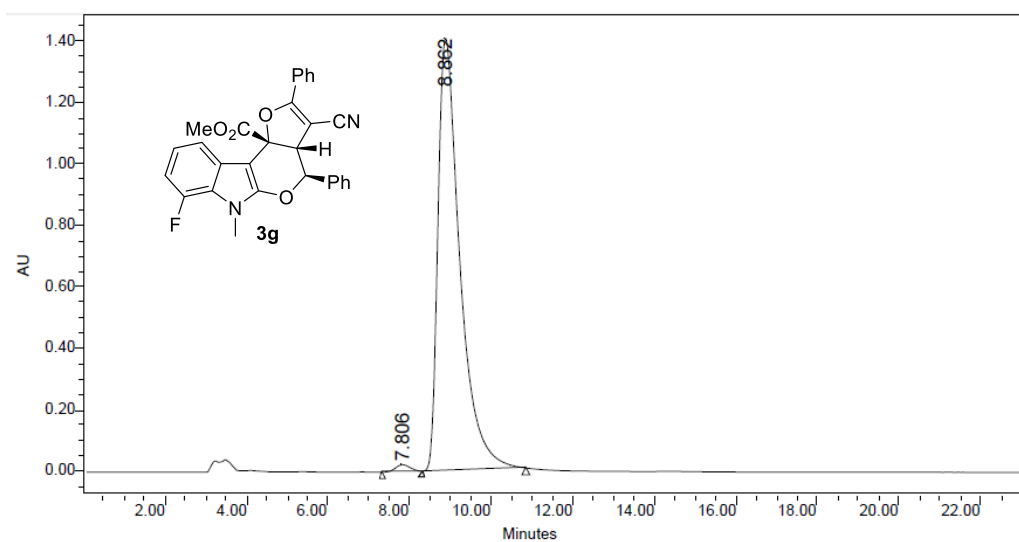

|   | RT (min) | Area (*sec) | % Area | Height ( ) | % Height |
|---|----------|-------------|--------|------------|----------|
| 1 | 7.806    | 553687      | 1.04   | 22670      | 1.59     |
| 2 | 8.862    | 52506685    | 98.96  | 1405163    | 98.41    |

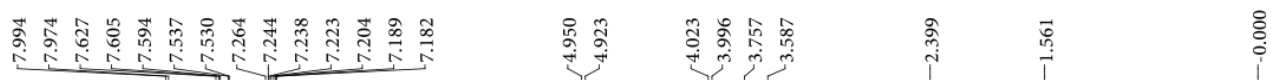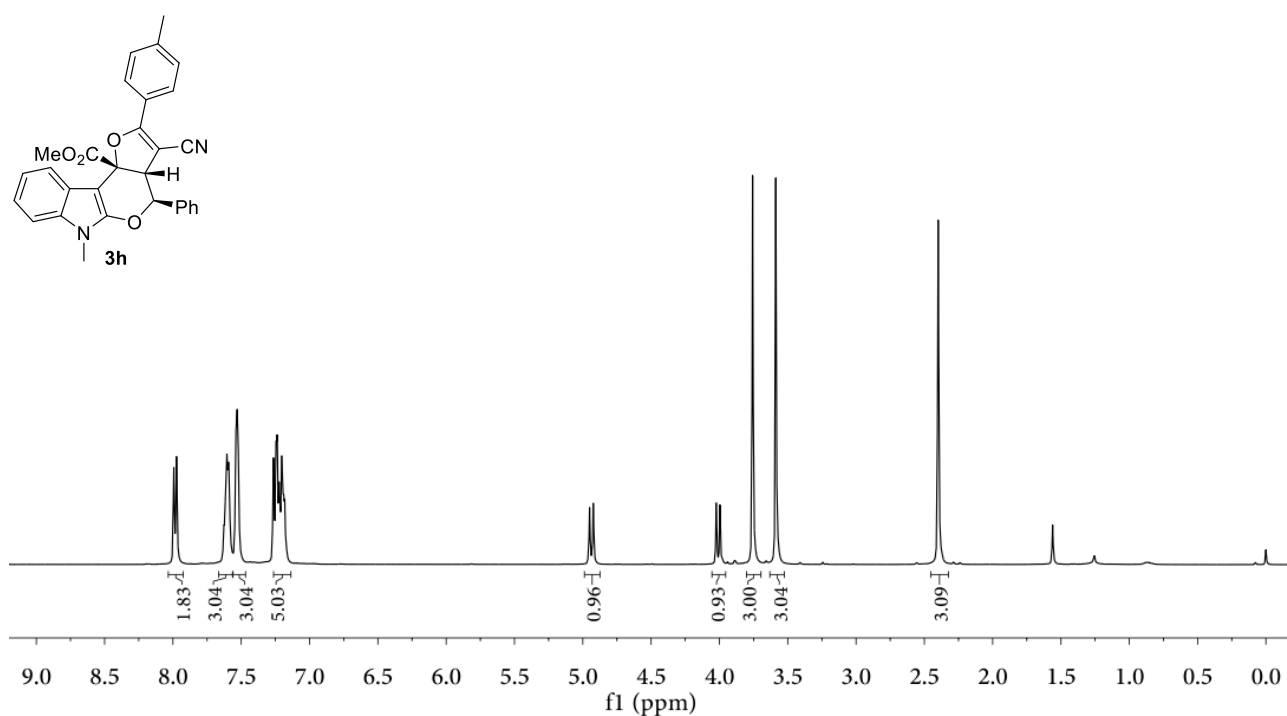

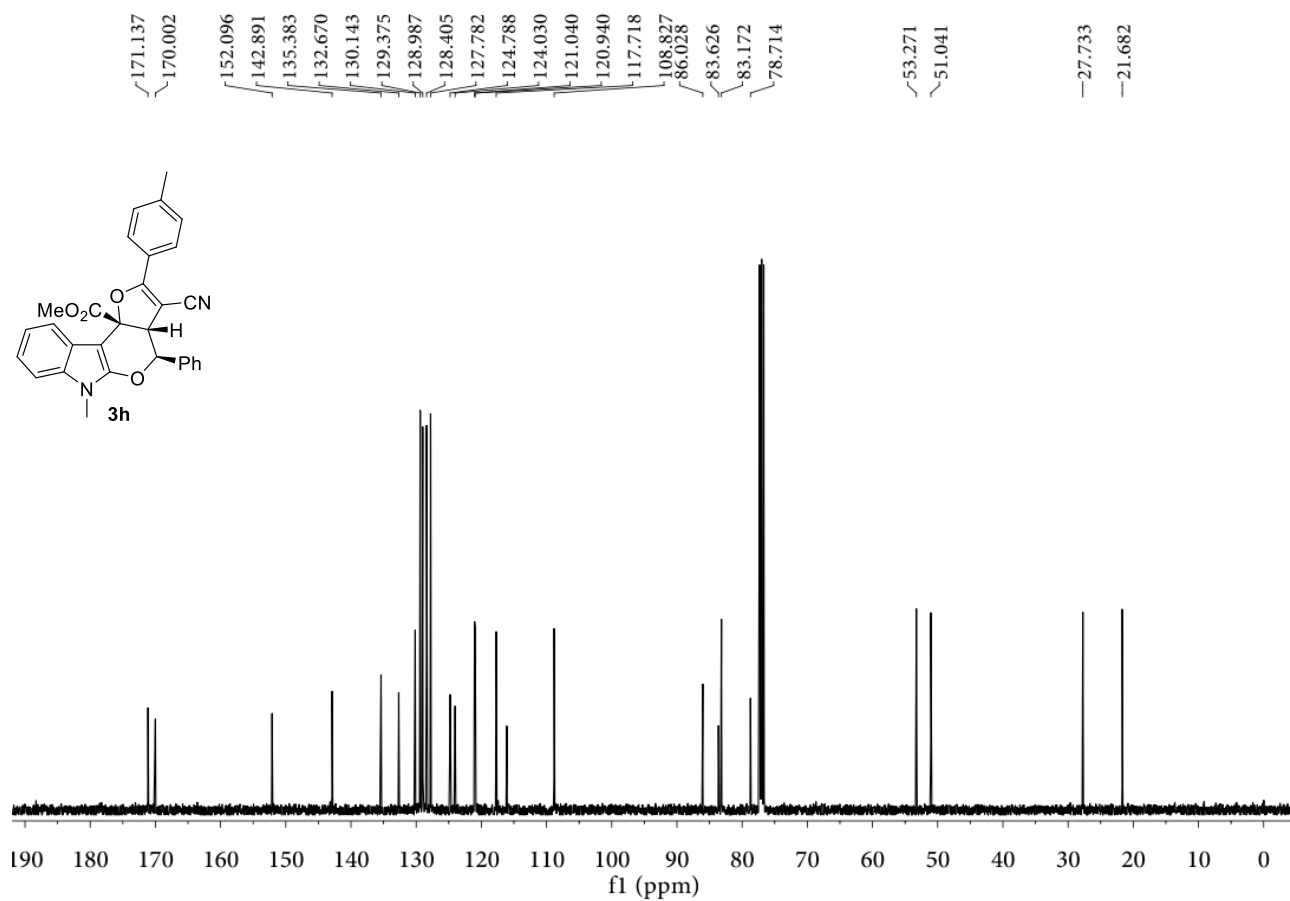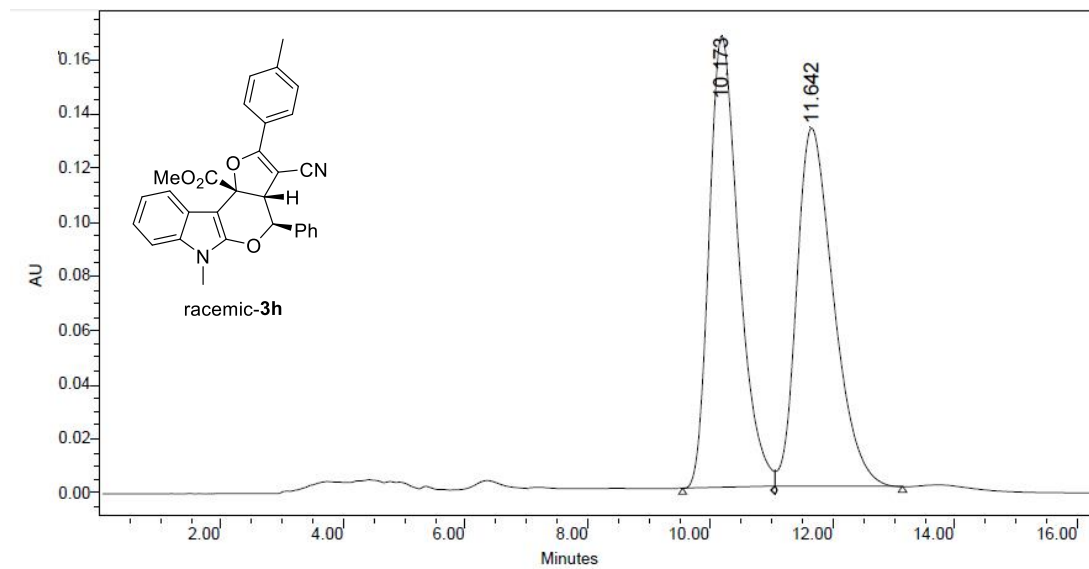

|   | RT (min) | Area (*sec) | % Area | Height ( ) | % Height |
|---|----------|-------------|--------|------------|----------|
| 1 | 10.173   | 5656897     | 50.37  | 167289     | 55.72    |
| 2 | 11.642   | 5572814     | 49.63  | 132932     | 44.28    |

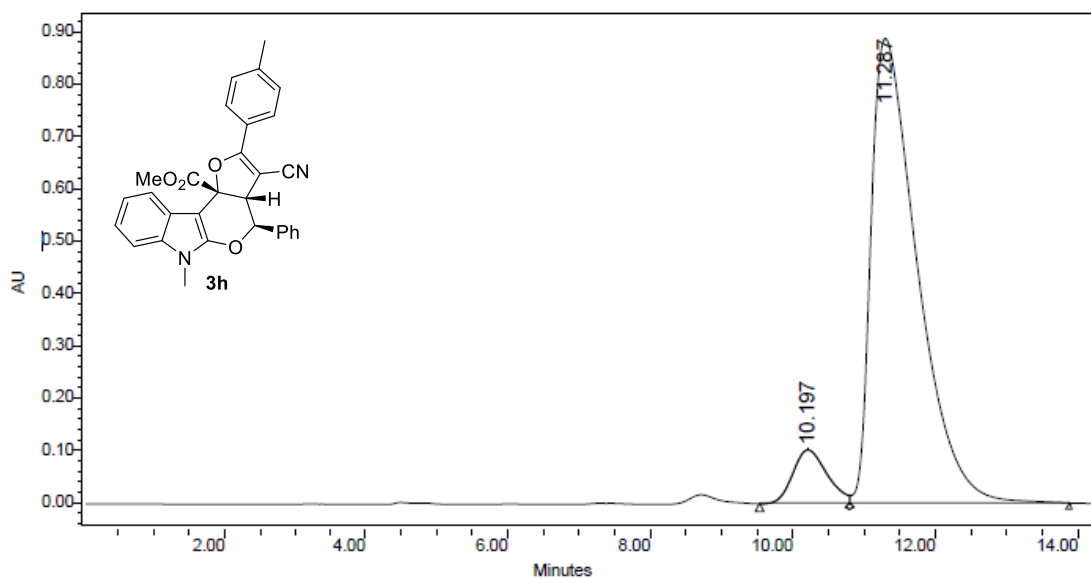

|   | RT (min) | Area (*sec) | % Area | Height ( ) | % Height |
|---|----------|-------------|--------|------------|----------|
| 1 | 10.197   | 3457646     | 7.95   | 102559     | 10.36    |
| 2 | 11.287   | 40034148    | 92.05  | 887755     | 89.64    |

8.038  
8.016  
7.608  
7.594  
7.586  
7.541  
7.534  
7.526  
7.437  
7.415  
7.249  
7.229  
7.208  
7.196  
7.190  
7.186  
7.174  
4.954  
4.927  
4.035  
4.008  
3.757  
3.586  
1.559  
0.000

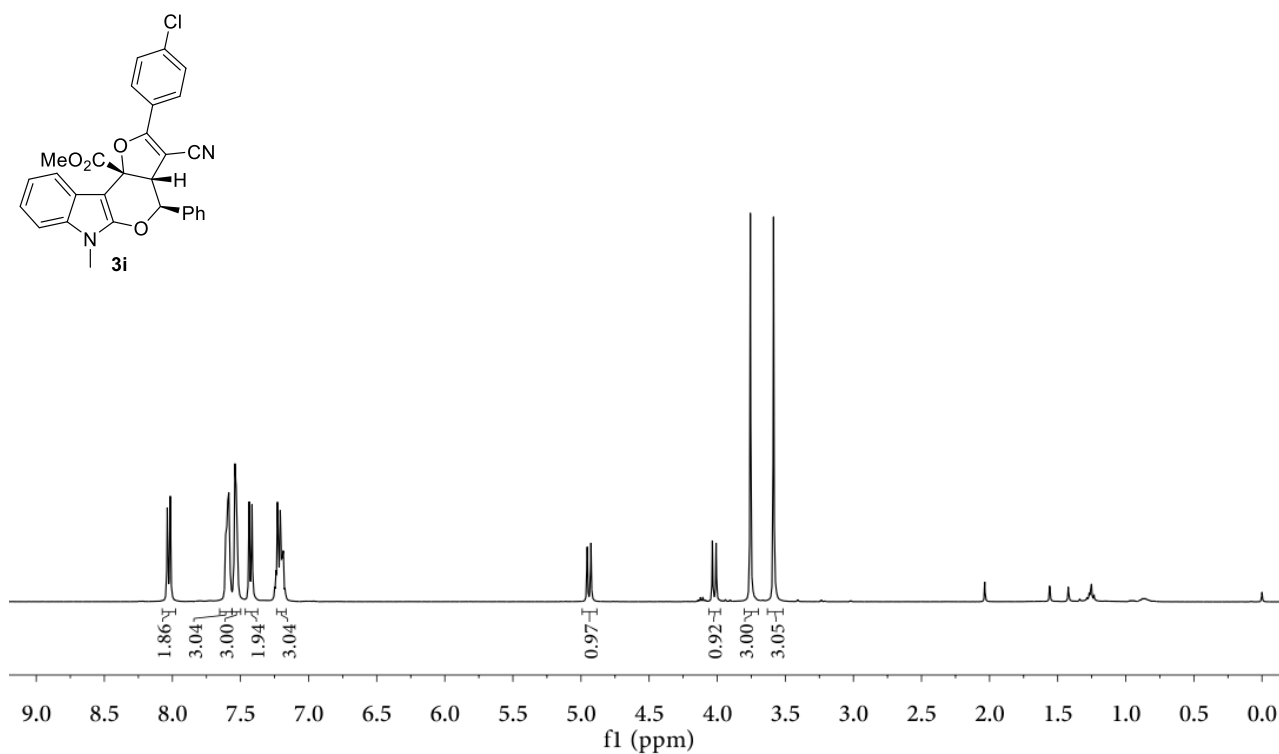

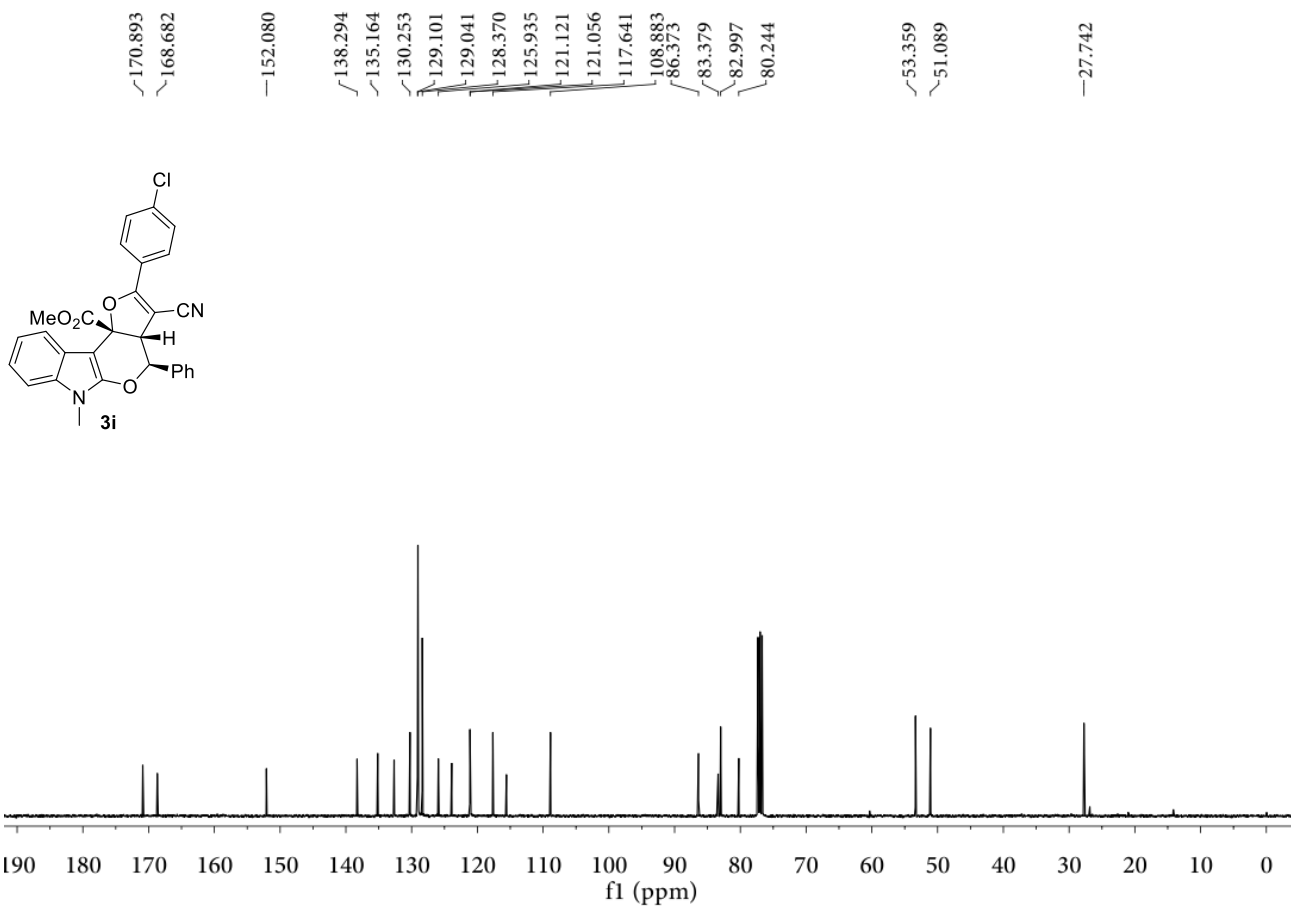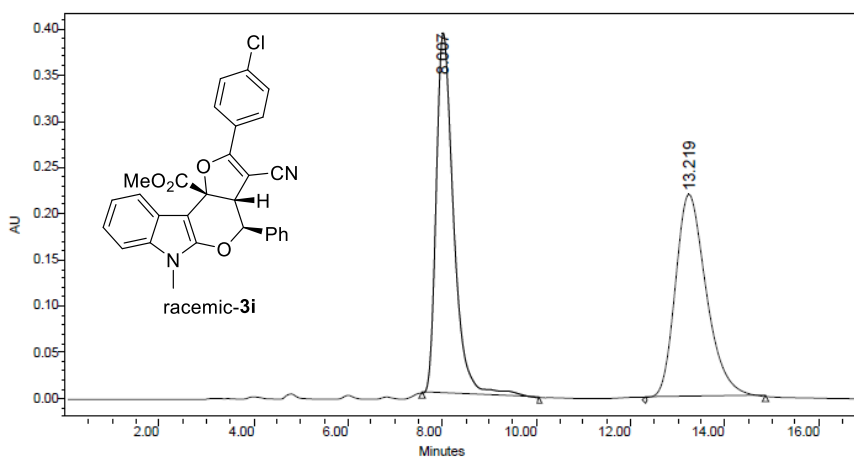

|   | RT (min) | Area (sec) | % Area | Height ( ) | % Height |
|---|----------|------------|--------|------------|----------|
| 1 | 8.007    | 10100792   | 50.07  | 390974     | 64.00    |
| 2 | 13.219   | 10072979   | 49.93  | 219907     | 36.00    |

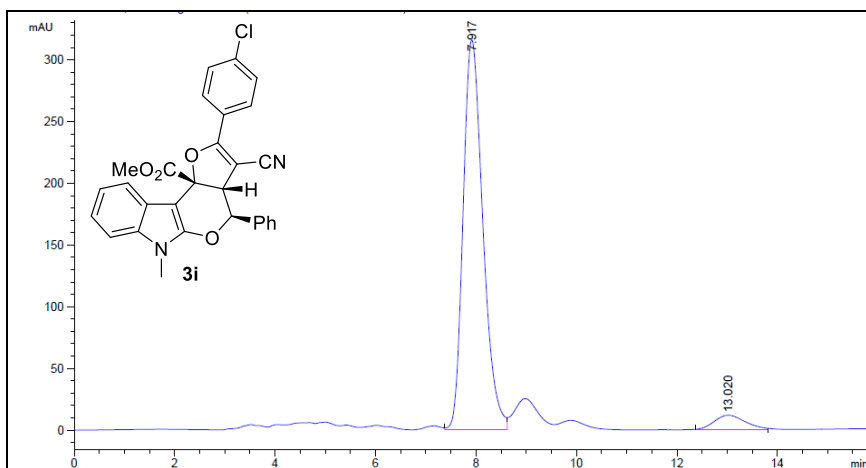

| Peak # | RetTime [min] | Type | Width [min] | Area mAU   | Area *s | Height [mAU] | Area %  |
|--------|---------------|------|-------------|------------|---------|--------------|---------|
| 1      | 7.917         | VV   | 0.4235      | 8620.59668 |         | 315.57886    | 94.8319 |
| 2      | 13.020        | MM   | 0.6963      | 469.80179  |         | 11.24545     | 5.1681  |

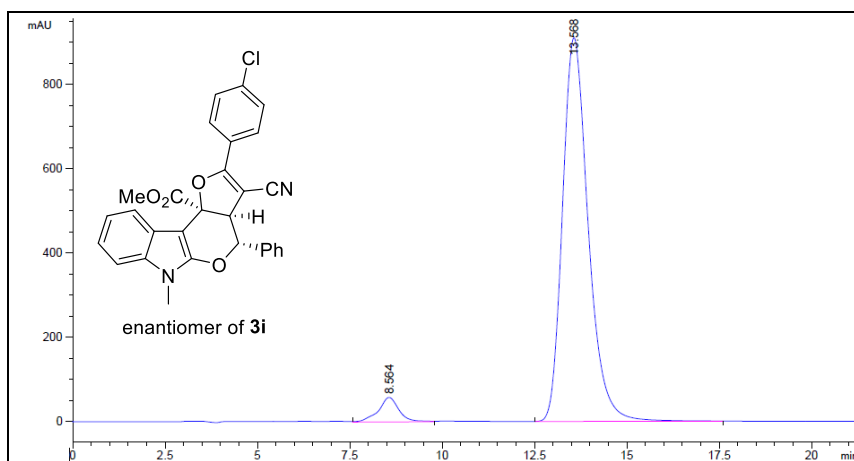

| Peak # | RetTime [min] | Type | Width [min] | Area mAU   | Area *s | Height [mAU] | Area %  |
|--------|---------------|------|-------------|------------|---------|--------------|---------|
| 1      | 8.564         | VV   | 0.5666      | 2274.73853 |         | 58.20887     | 4.9143  |
| 2      | 13.568        | BB   | 0.7451      | 4.40134e4  |         | 909.56244    | 95.0857 |



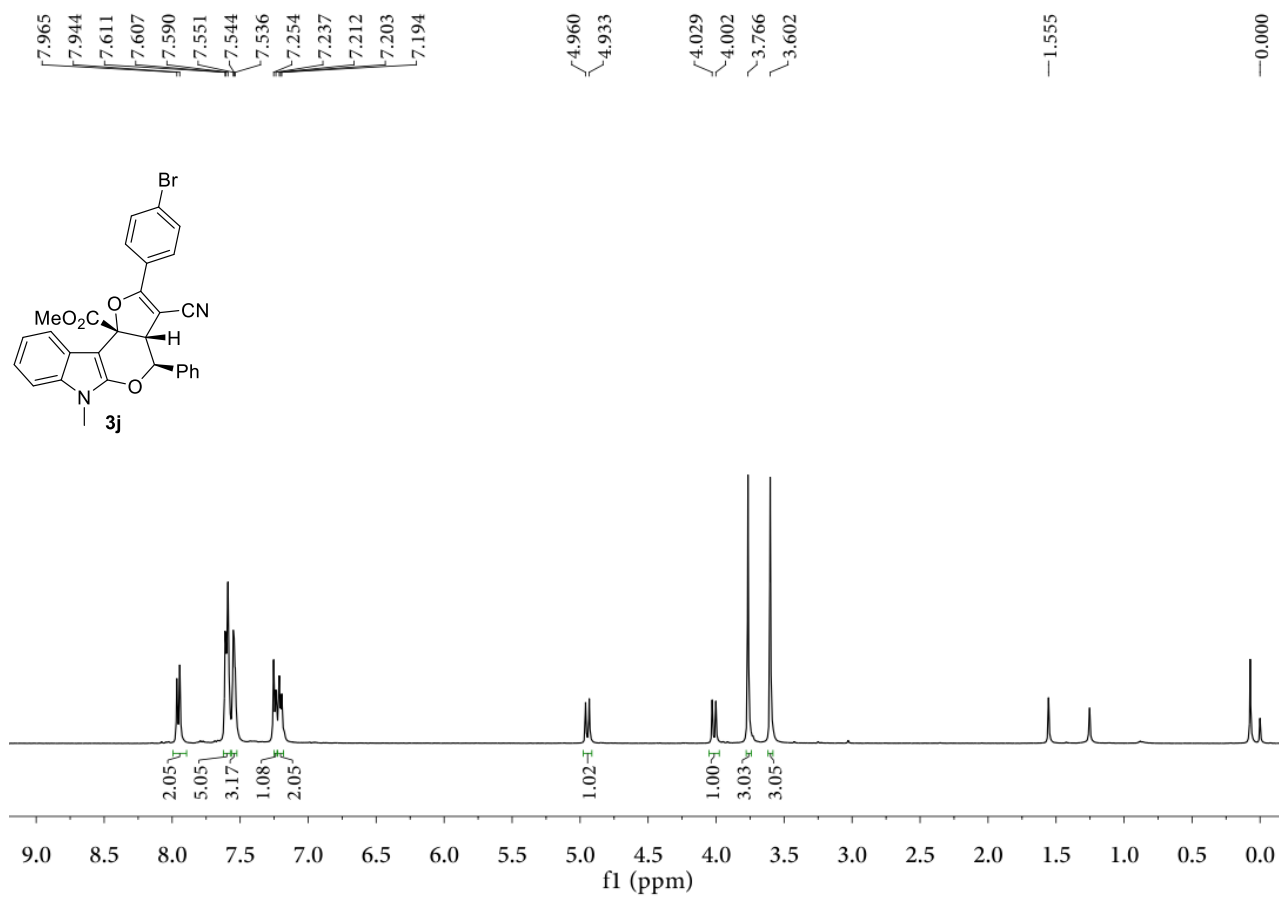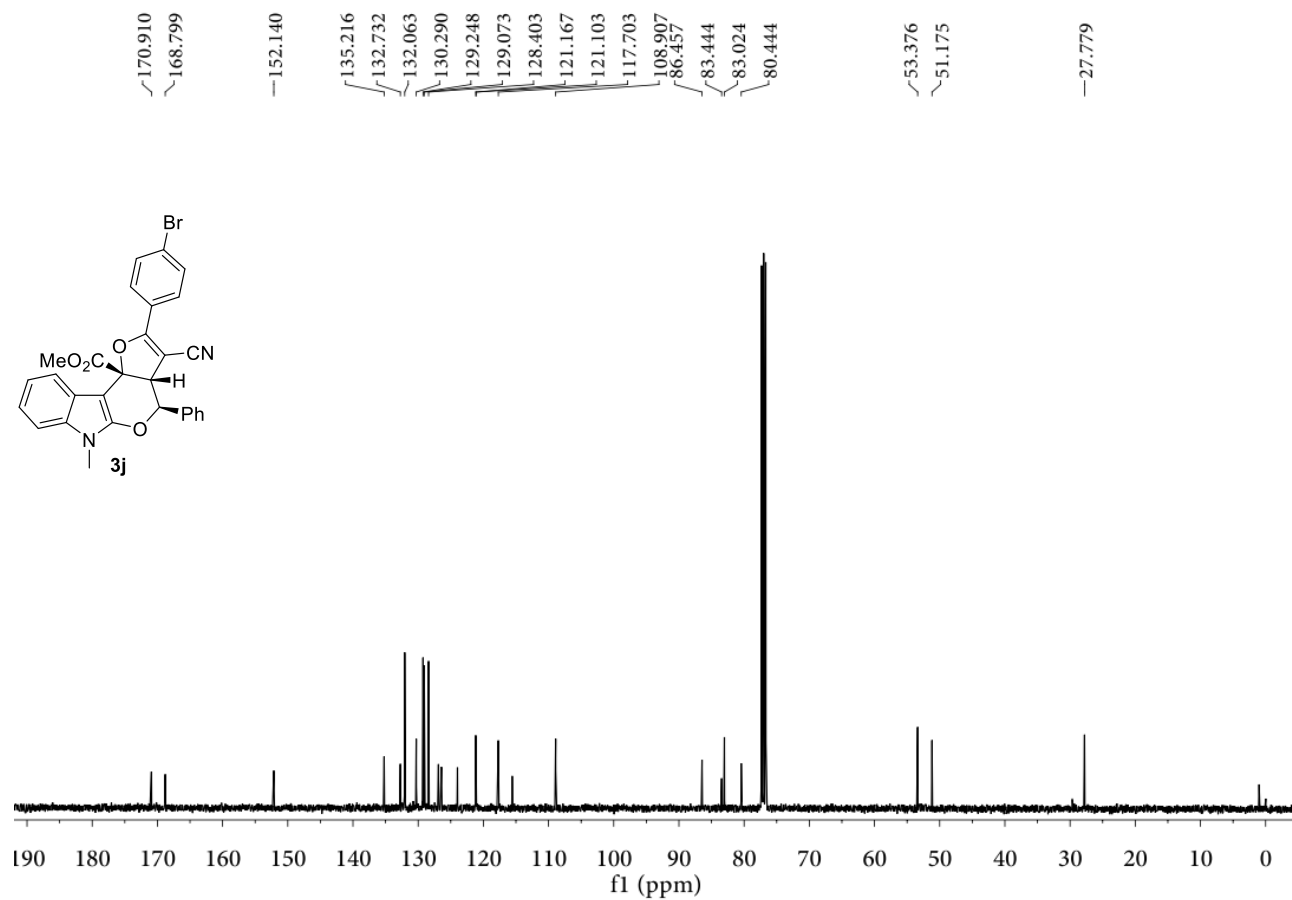

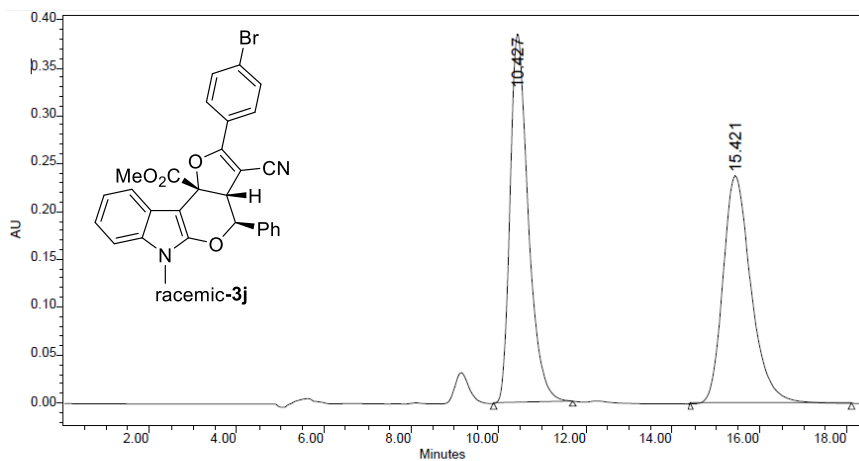

|   | RT (min) | Area (*sec) | % Area | Height ( ) | % Height |
|---|----------|-------------|--------|------------|----------|
| 1 | 10.427   | 11194411    | 51.13  | 384931     | 61.82    |
| 2 | 15.421   | 10697603    | 48.87  | 237724     | 38.18    |

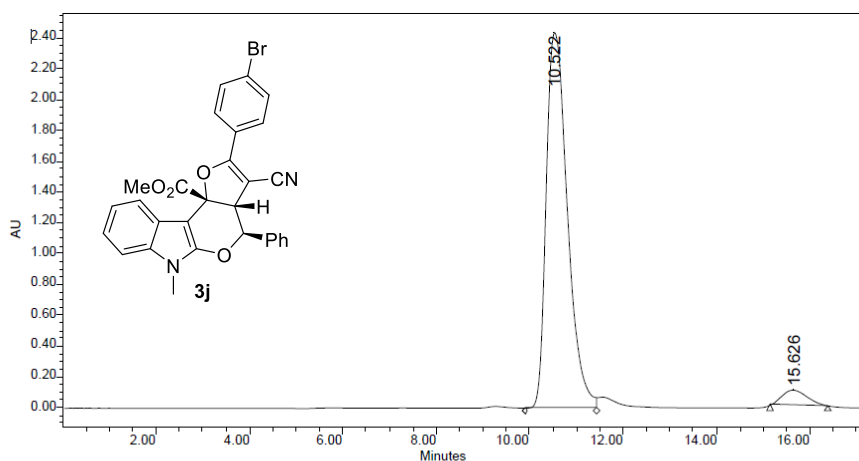

|   | RT (min) | Area (*sec) | % Area | Height ( ) | % Height |
|---|----------|-------------|--------|------------|----------|
| 1 | 10.522   | 77046430    | 95.44  | 2441996    | 96.11    |
| 2 | 15.626   | 3684687     | 4.56   | 98818      | 3.89     |

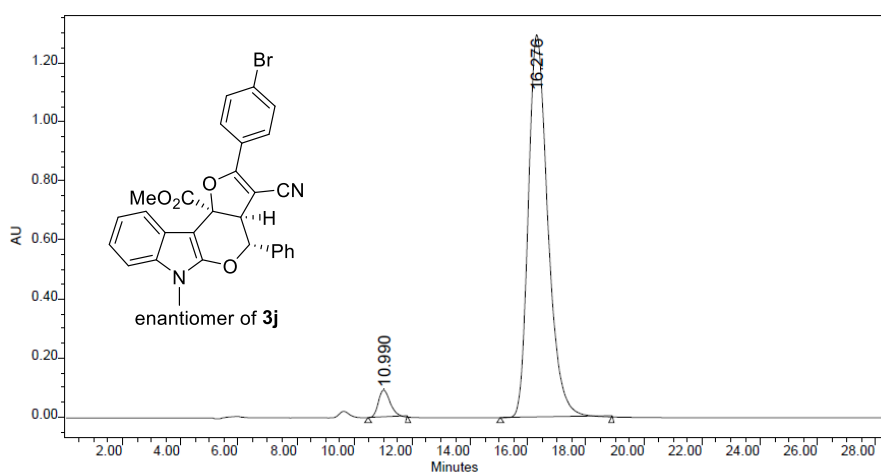

|   | RT (min) | Area (*sec) | % Area | Height ( ) | % Height |
|---|----------|-------------|--------|------------|----------|
| 1 | 10.990   | 2698376     | 4.25   | 92977      | 6.70     |
| 2 | 16.276   | 60827321    | 95.75  | 1294313    | 93.30    |

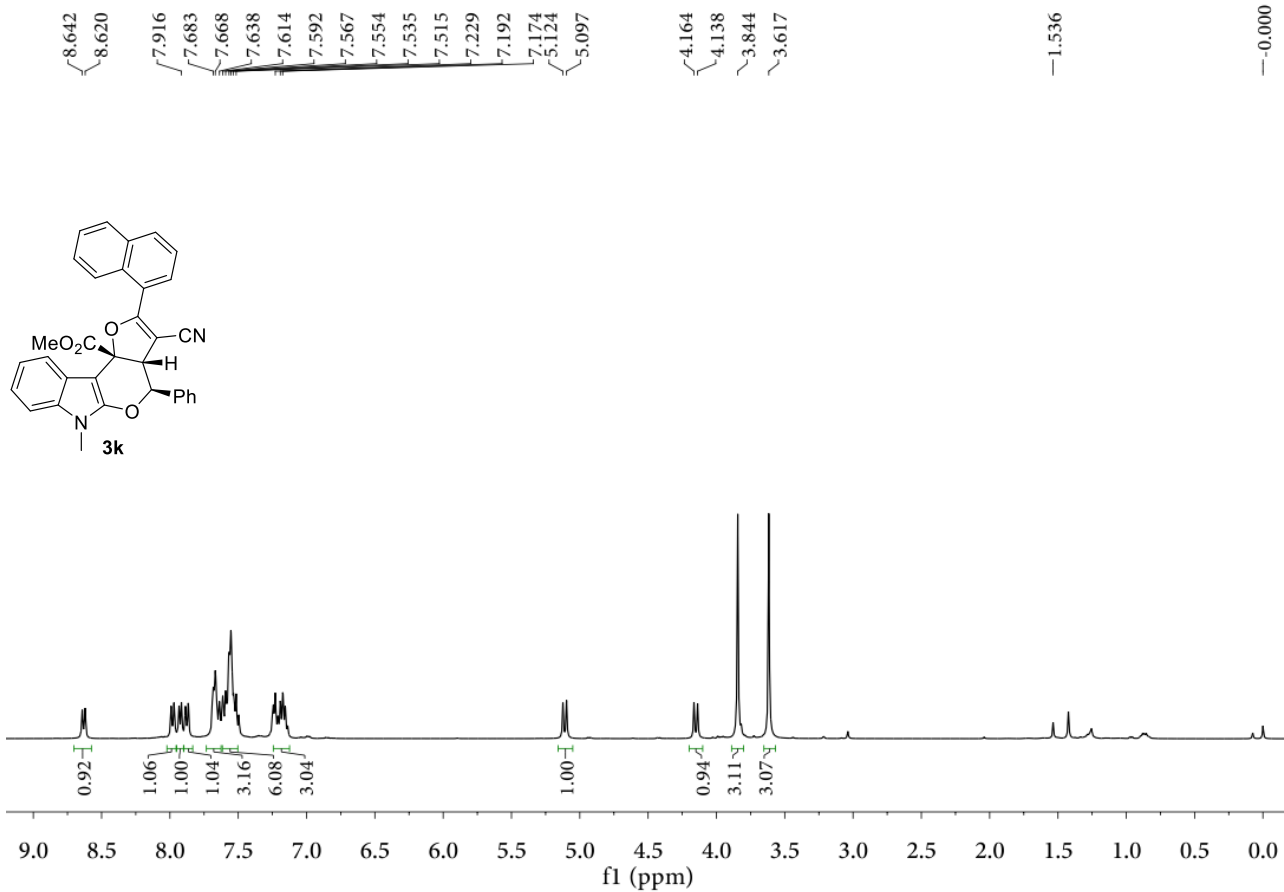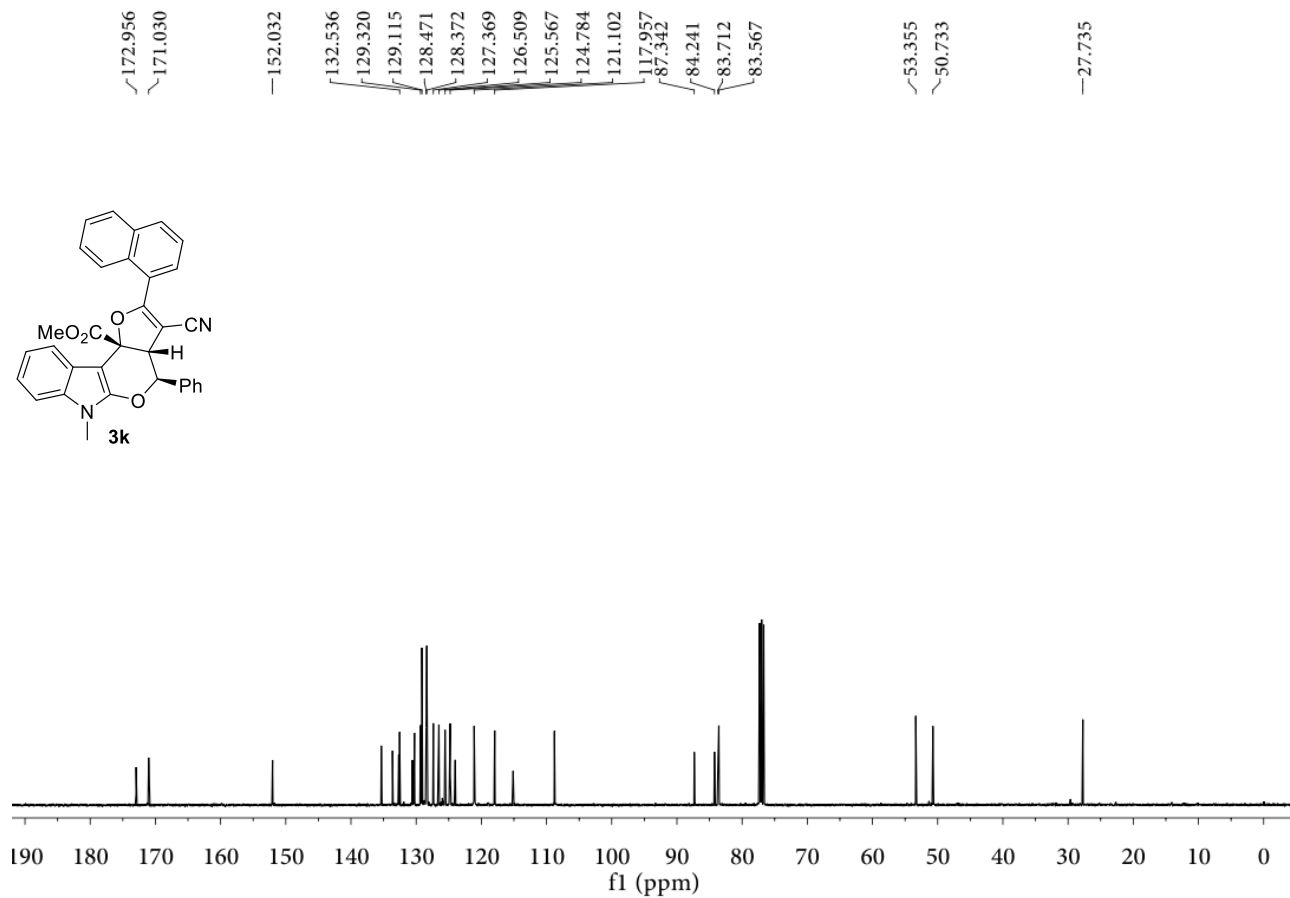

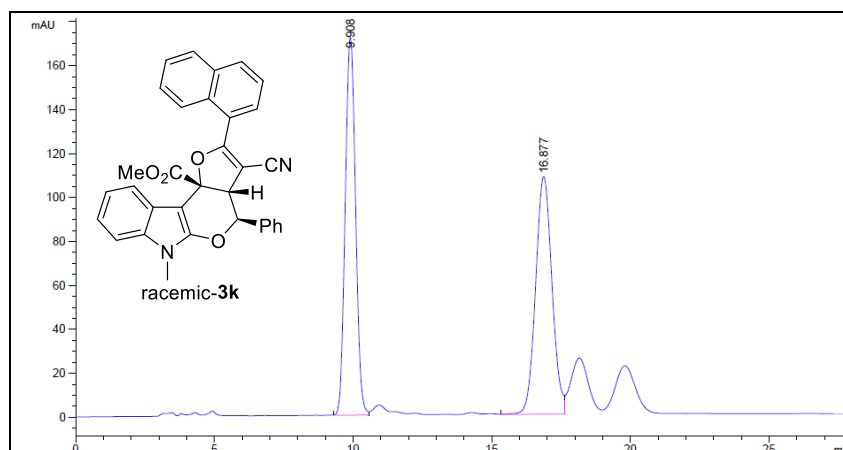

| Peak # | RetTime [min] | Type | Width [min] | Area mAU *s | Height [mAU] | Area %  |
|--------|---------------|------|-------------|-------------|--------------|---------|
| 1      | 9.908         | BV   | 0.4126      | 4446.44287  | 171.82504    | 50.0880 |
| 2      | 16.877        | VV   | 0.6355      | 4430.82715  | 108.09156    | 49.9120 |

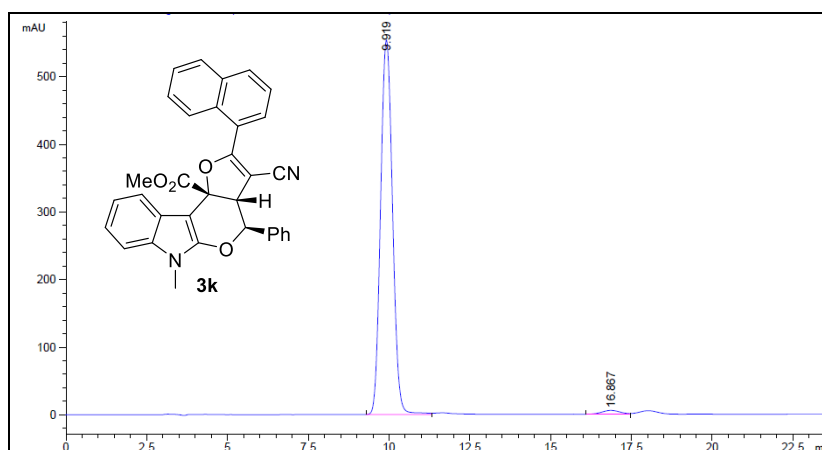

| Peak # | RetTime [min] | Type | Width [min] | Area mAU *s | Height [mAU] | Area %  |
|--------|---------------|------|-------------|-------------|--------------|---------|
| 1      | 9.919         | BV   | 0.4048      | 1.42302e4   | 553.54523    | 98.4561 |
| 2      | 16.867        | BV   | 0.6180      | 223.15167   | 5.65088      | 1.5439  |

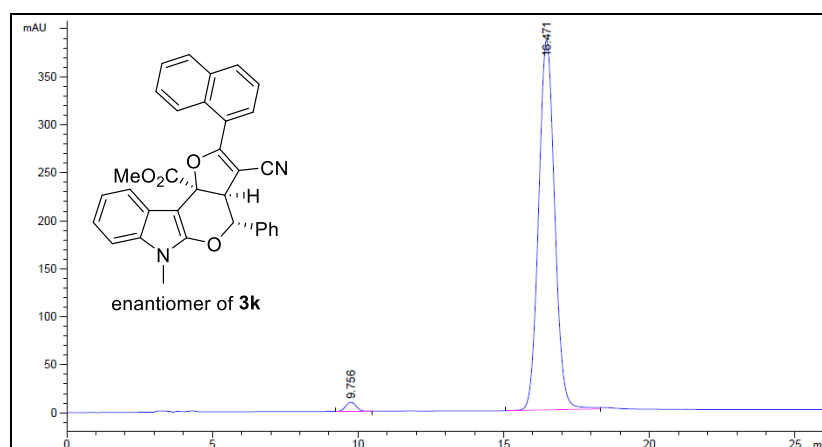

| Peak # | RetTime [min] | Type | Width [min] | Area mAU *s | Height [mAU] | Area %  |
|--------|---------------|------|-------------|-------------|--------------|---------|
| 1      | 9.756         | BB   | 0.3931      | 234.79292   | 9.50391      | 1.5654  |
| 2      | 16.471        | BB   | 0.5984      | 1.47641e4   | 385.39102    | 98.4346 |

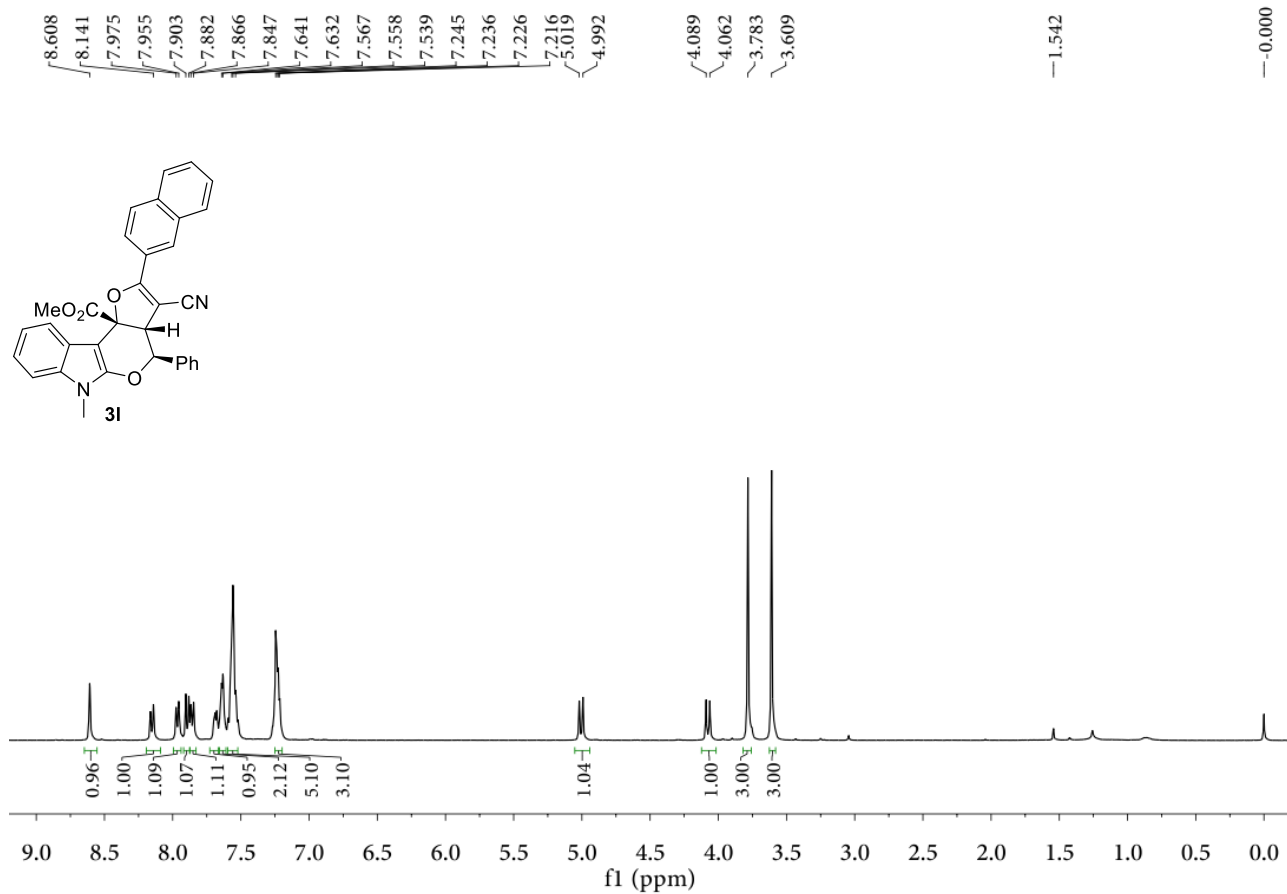

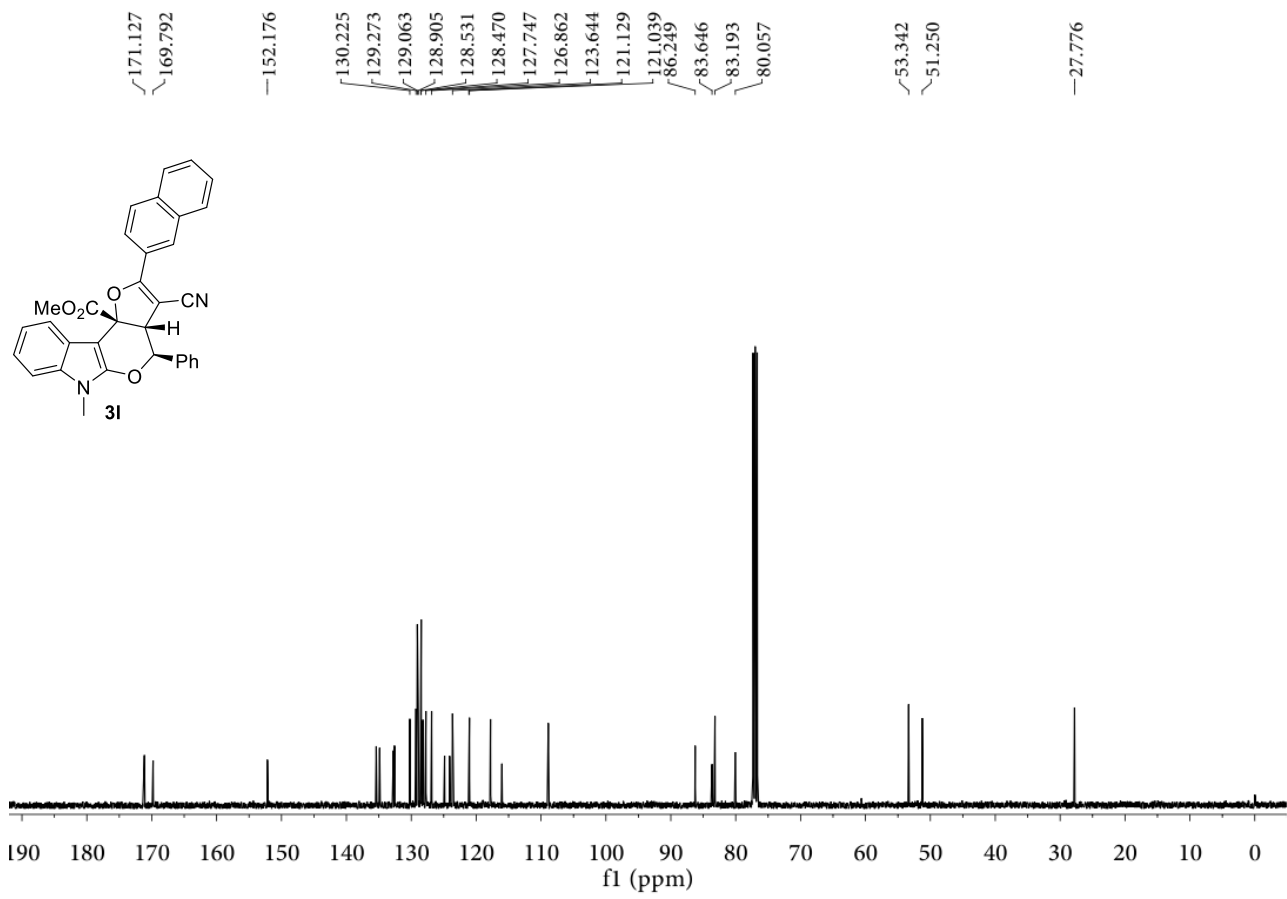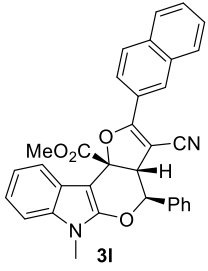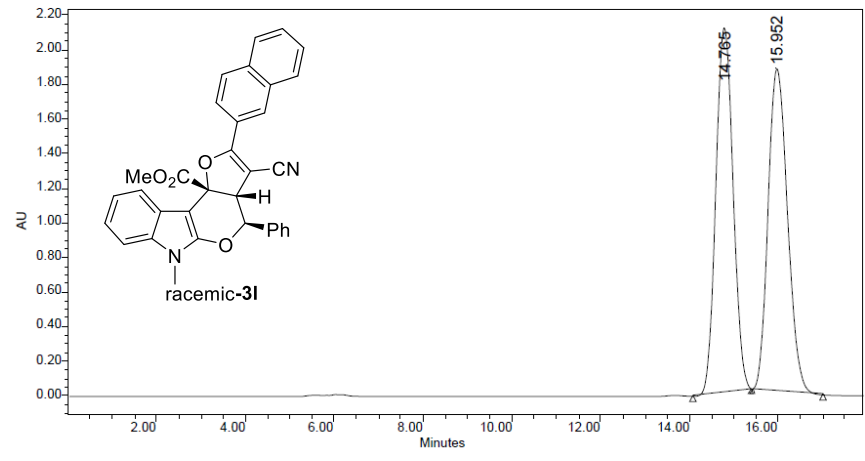

|   | RT (min) | Area (*sec) | % Area | Height ( ) | % Height |
|---|----------|-------------|--------|------------|----------|
| 1 | 14.765   | 56920494    | 50.14  | 2106657    | 53.08    |
| 2 | 15.952   | 56610251    | 49.86  | 1862284    | 46.92    |

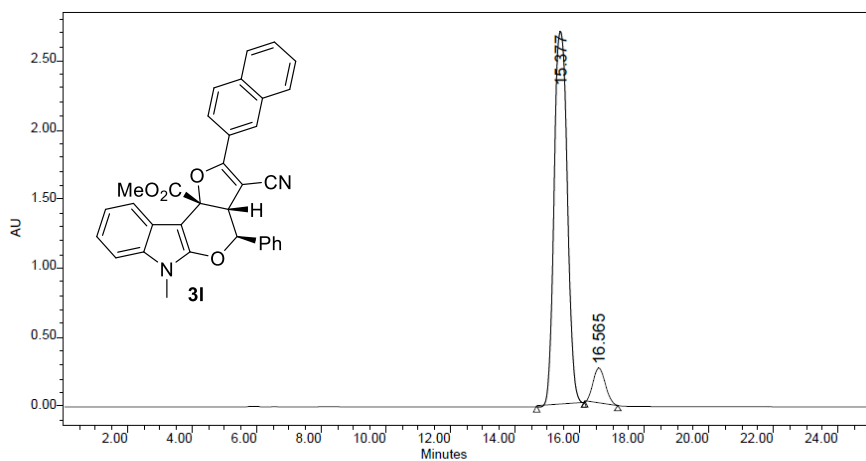

|   | RT (min) | Area (*sec) | % Area | Height ( ) | % Height |
|---|----------|-------------|--------|------------|----------|
| 1 | 15.377   | 76796170    | 91.83  | 2699747    | 91.33    |
| 2 | 16.565   | 6829824     | 8.17   | 256288     | 8.67     |

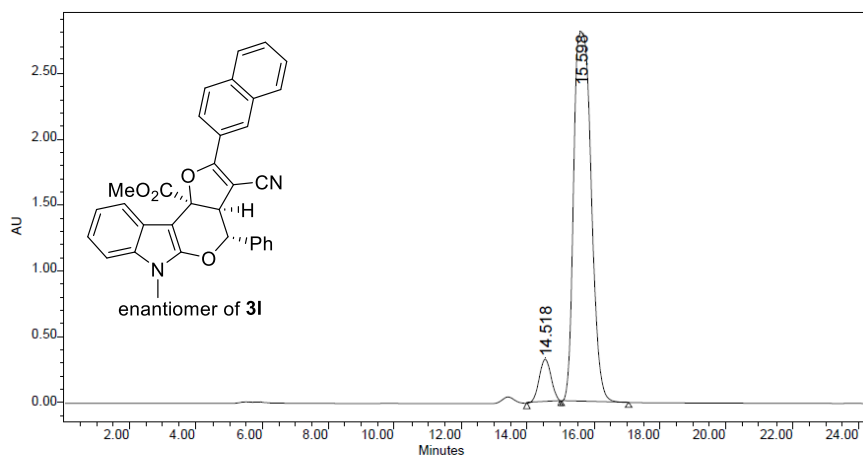

|   | RT (min) | Area (*sec) | % Area | Height ( ) | % Height |
|---|----------|-------------|--------|------------|----------|
| 1 | 14.518   | 8140656     | 7.34   | 324564     | 10.37    |
| 2 | 15.598   | 102705658   | 92.66  | 2805223    | 89.63    |

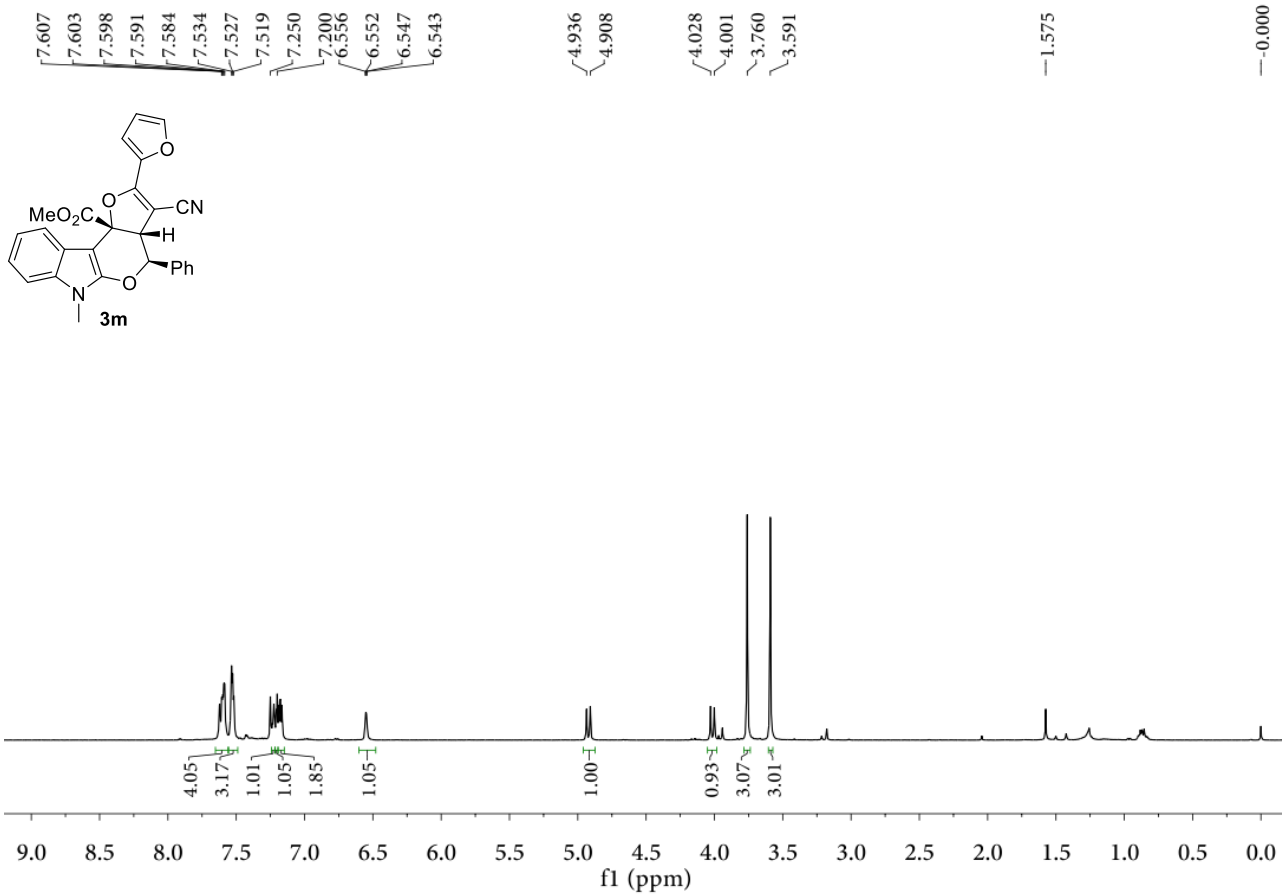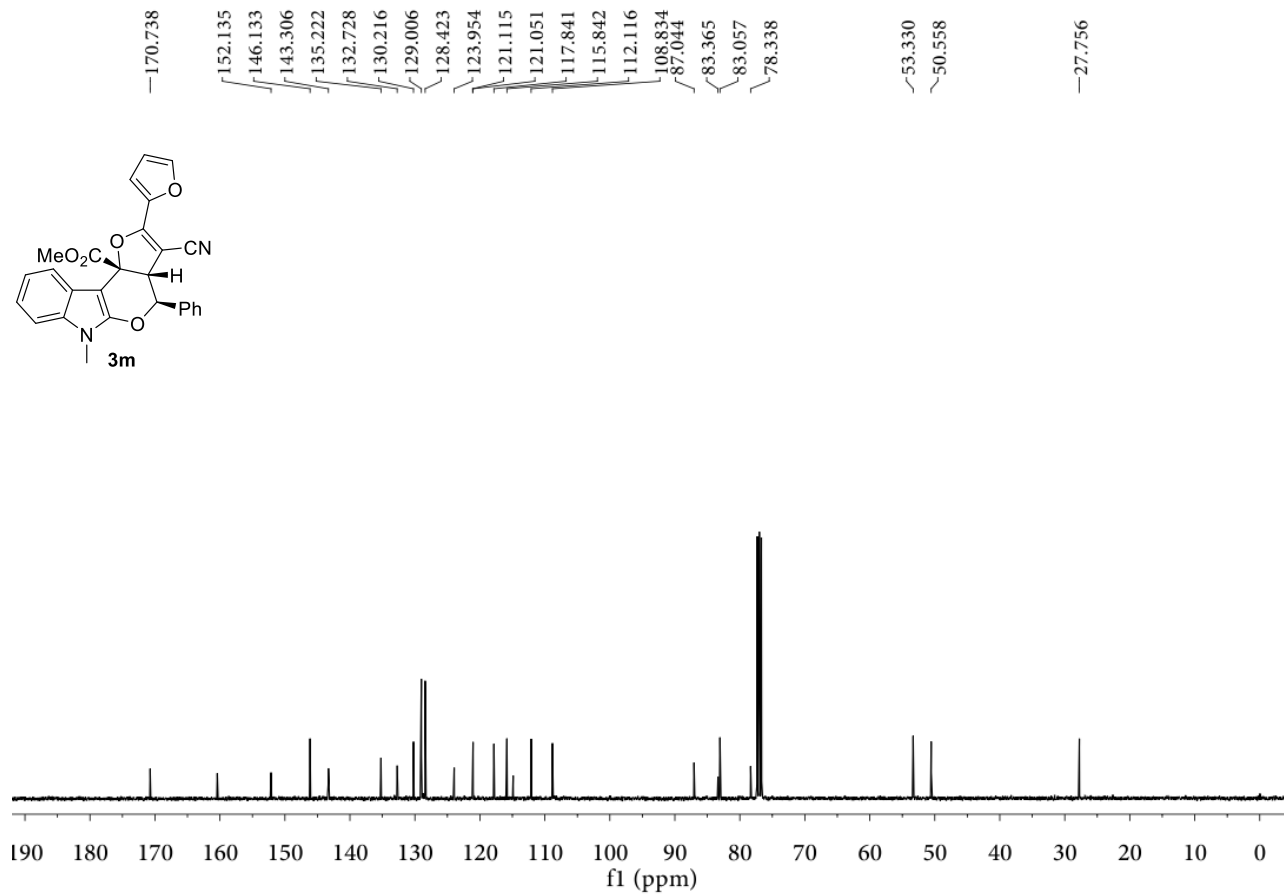



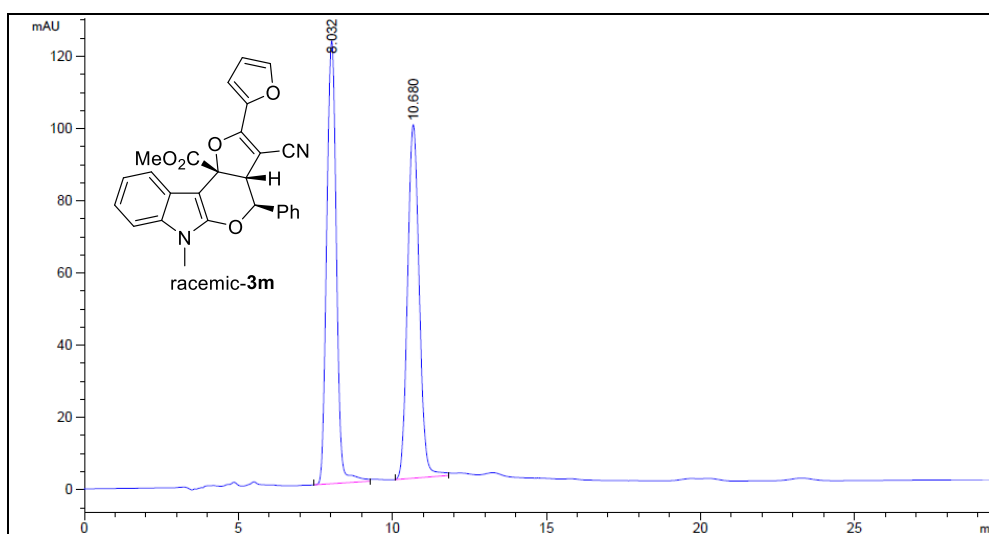

| Peak # | RetTime [min] | Type | Width [min] | Area mAU *s | Height [mAU] | Area %  |
|--------|---------------|------|-------------|-------------|--------------|---------|
| 1      | 8.032         | BB   | 0.3490      | 2686.56372  | 122.50733    | 50.9305 |
| 2      | 10.680        | BB   | 0.4134      | 2588.39429  | 97.84978     | 49.0695 |

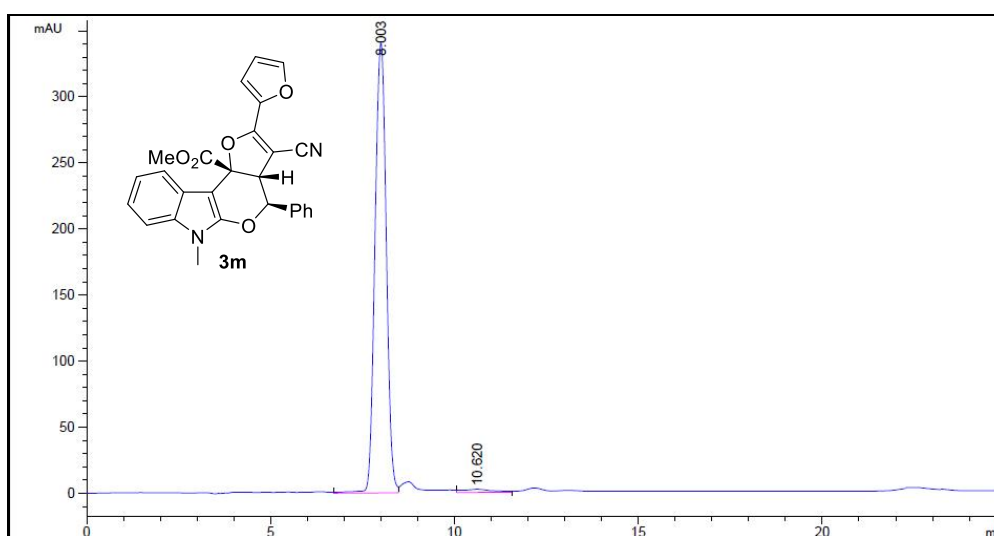

| Peak # | RetTime [min] | Type | Width [min] | Area mAU *s | Height [mAU] | Area %  |
|--------|---------------|------|-------------|-------------|--------------|---------|
| 1      | 8.003         | VV   | 0.3488      | 7286.86328  | 340.29074    | 98.0862 |
| 2      | 10.620        | BV   | 0.8027      | 142.17967   | 2.39699      | 1.9138  |

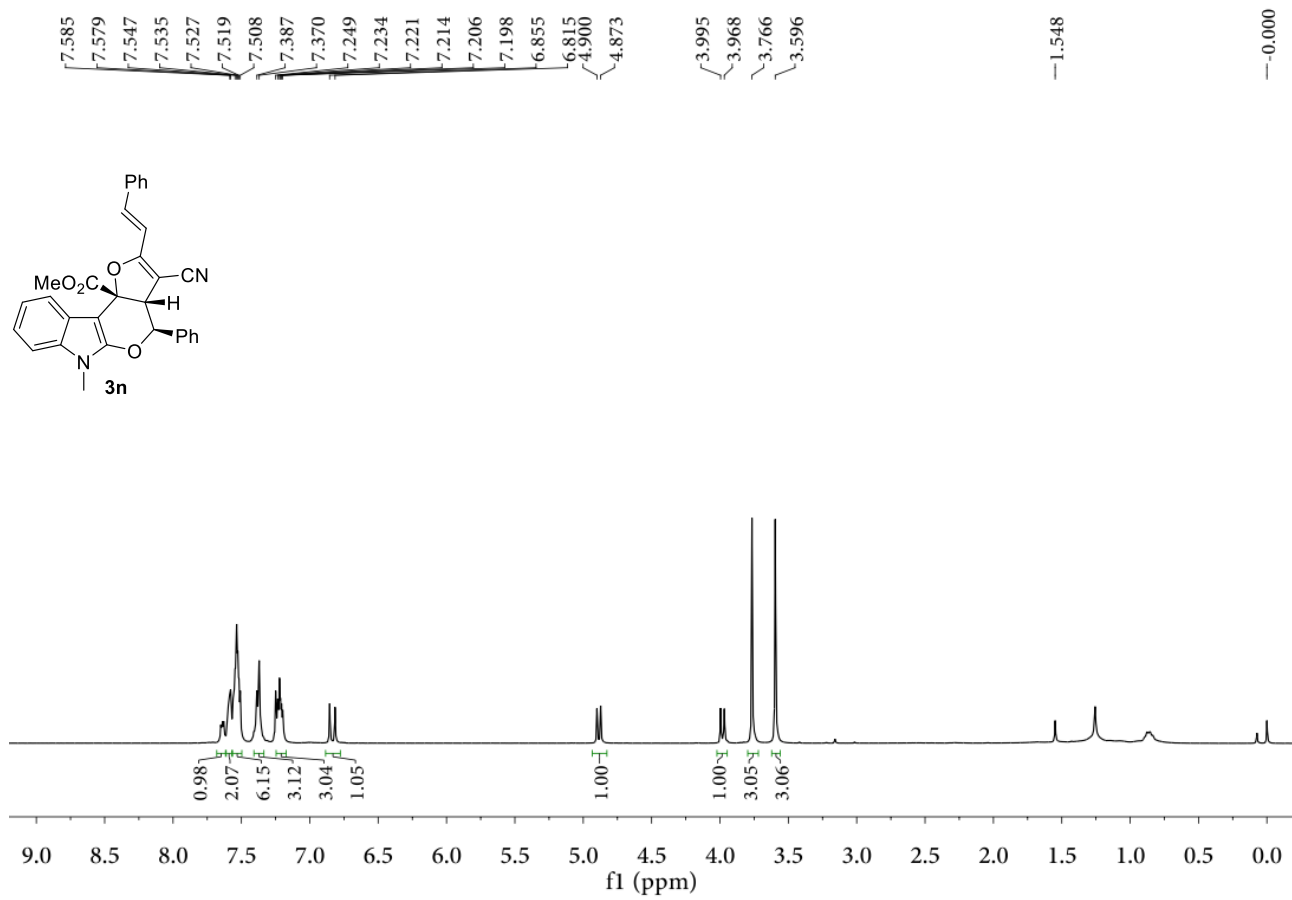

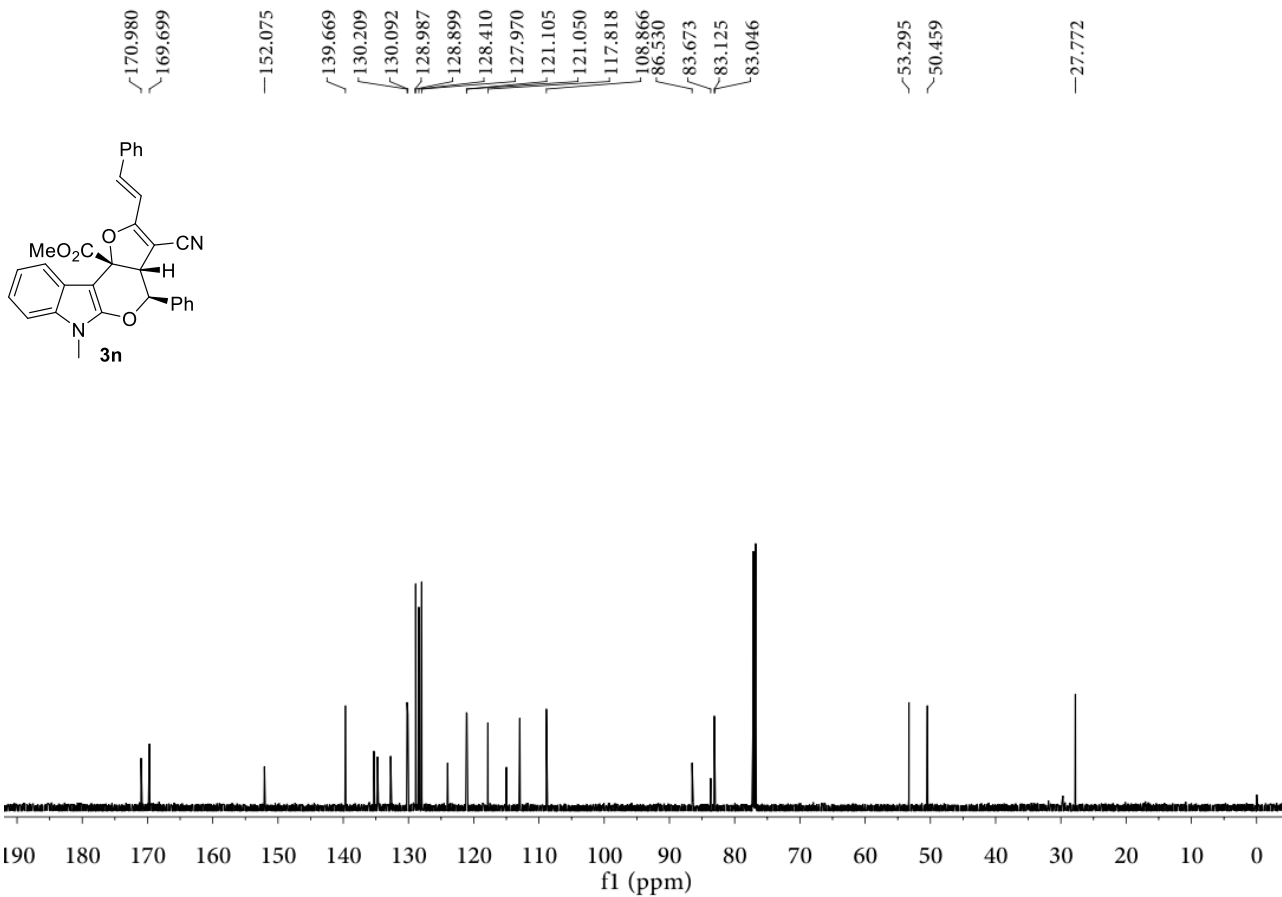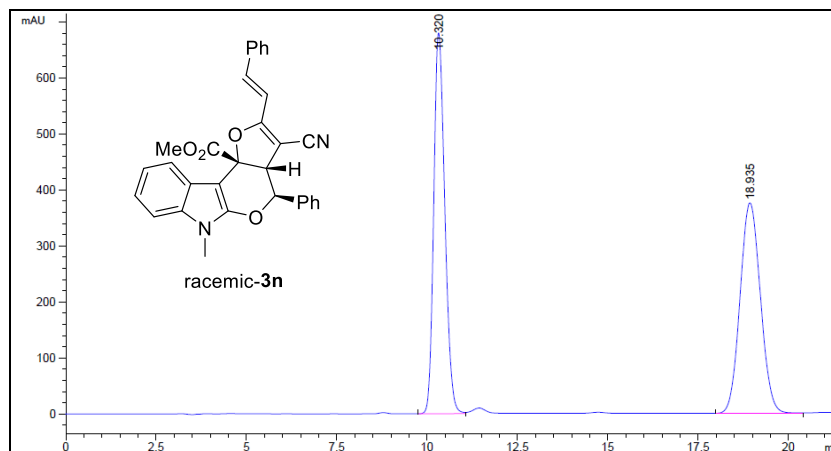

| Peak # | RetTime [min] | Type | Width [min] | Area mAU  | Area *s | Height [mAU] | Area %  |
|--------|---------------|------|-------------|-----------|---------|--------------|---------|
| 1      | 10.320        | BV   | 0.3299      | 1.44656e4 |         | 679.46362    | 49.4866 |
| 2      | 18.935        | BV   | 0.6156      | 1.47658e4 |         | 375.80792    | 50.5134 |

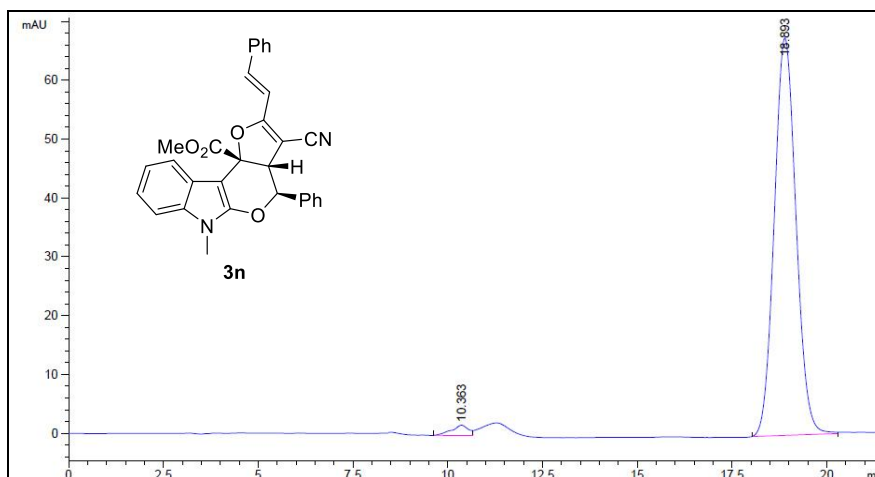

| Peak # | RetTime [min] | Type | Width [min] | Area mAU *s | Height [mAU] | Area %  |
|--------|---------------|------|-------------|-------------|--------------|---------|
| 1      | 10.363        | MM   | 0.5178      | 54.46294    | 1.75305      | 1.9861  |
| 2      | 18.893        | BB   | 0.6216      | 2687.75293  | 67.52803     | 98.0139 |

7.552  
7.519  
7.512  
7.252  
7.233  
7.215  
7.191  
7.174  
7.158  
7.140

4.819  
4.792

3.889  
3.862  
3.756  
3.578

-2.207

-0.001

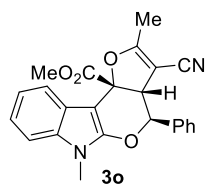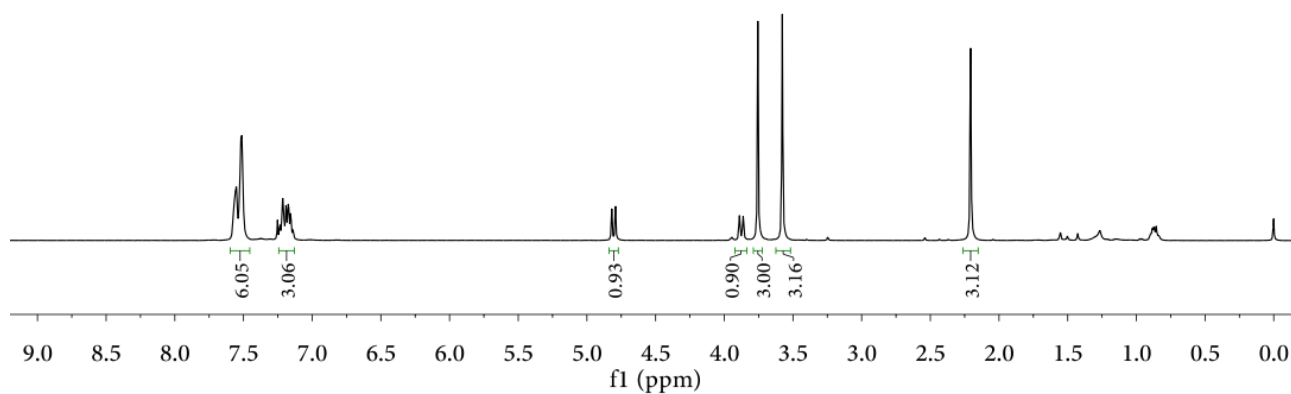

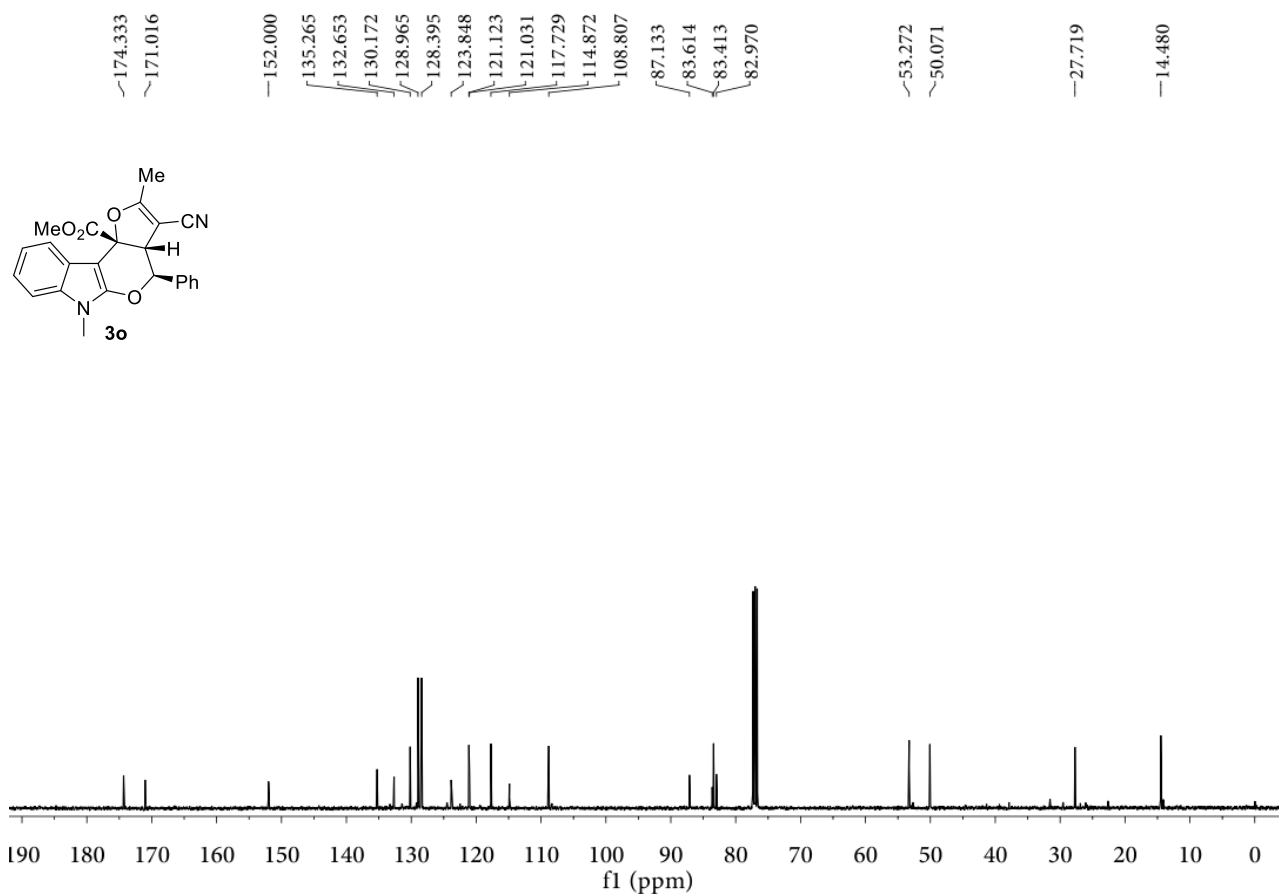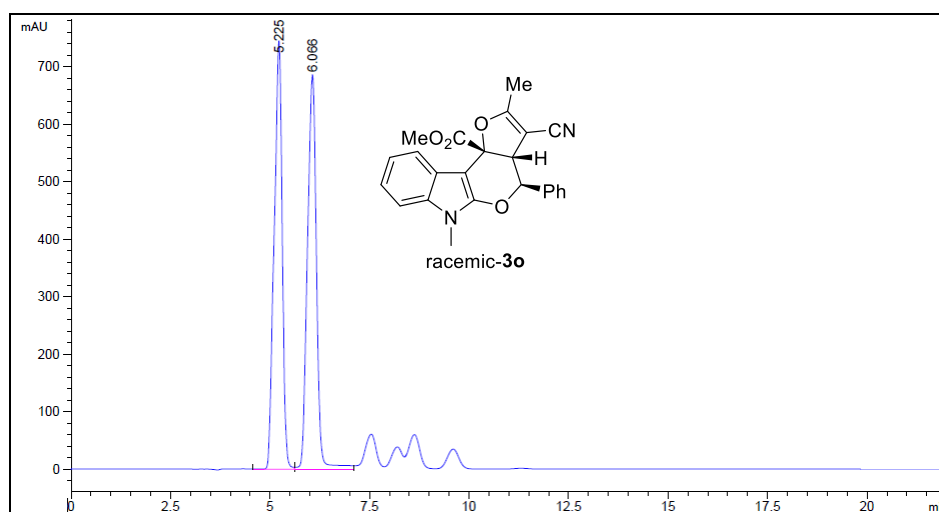

| Peak # | RetTime [min] | Type | Width [min] | Area mAU  | Area %  | Height [mAU] | Area %  |
|--------|---------------|------|-------------|-----------|---------|--------------|---------|
| 1      | 5.225         | VV   | 0.2049      | 1.04660e4 | 49.1123 | 744.15814    | 49.1123 |
| 2      | 6.066         | VB   | 0.2604      | 1.08444e4 | 50.8877 | 685.03015    | 50.8877 |

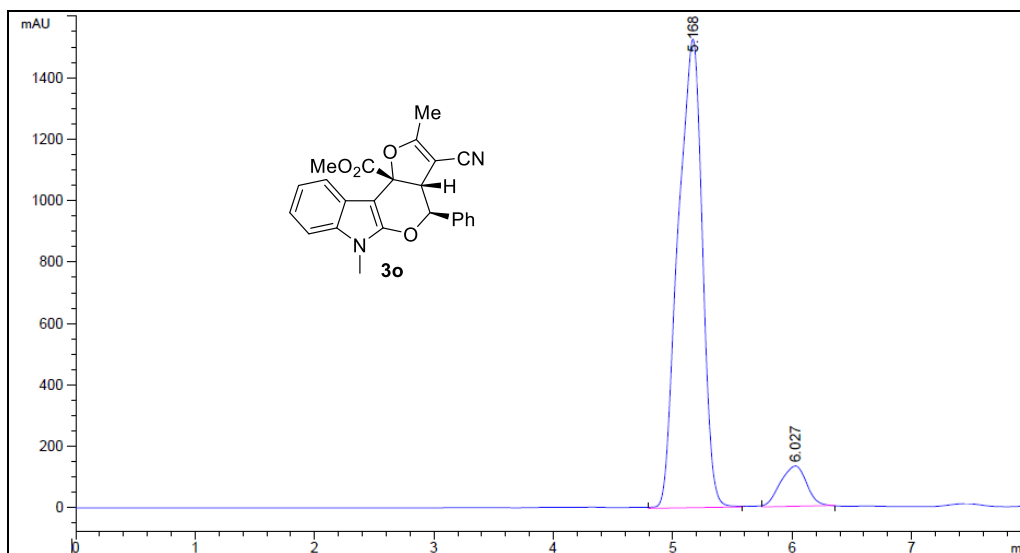

| Peak # | RetTime [min] | Type | Width [min] | Area mAU   | *s | Height [mAU] | Area %  |
|--------|---------------|------|-------------|------------|----|--------------|---------|
| 1      | 5.168         | MM   | 0.2336      | 2.14363e4  |    | 1529.10999   | 91.4612 |
| 2      | 6.027         | MM   | 0.2543      | 2001.27808 |    | 131.16069    | 8.5388  |

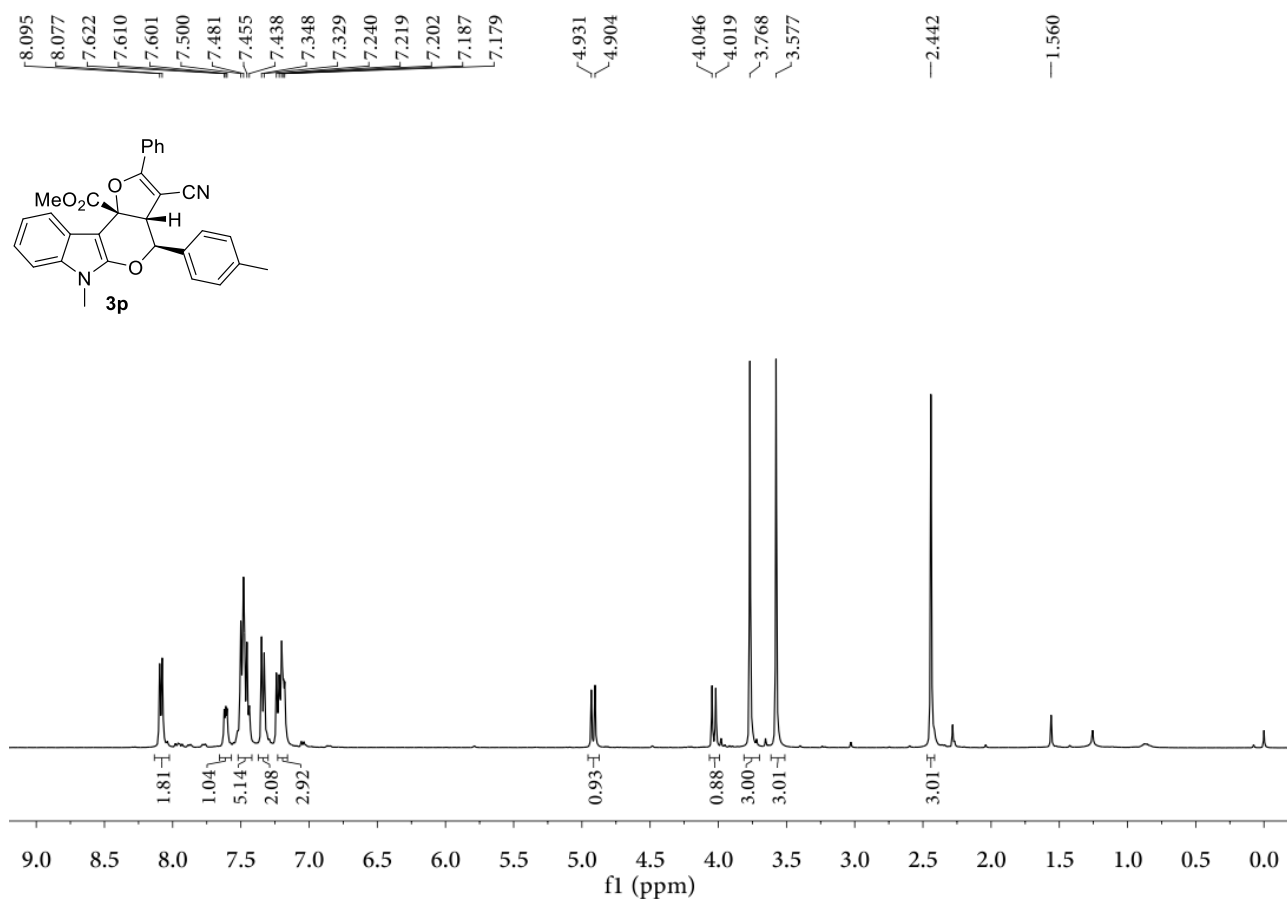

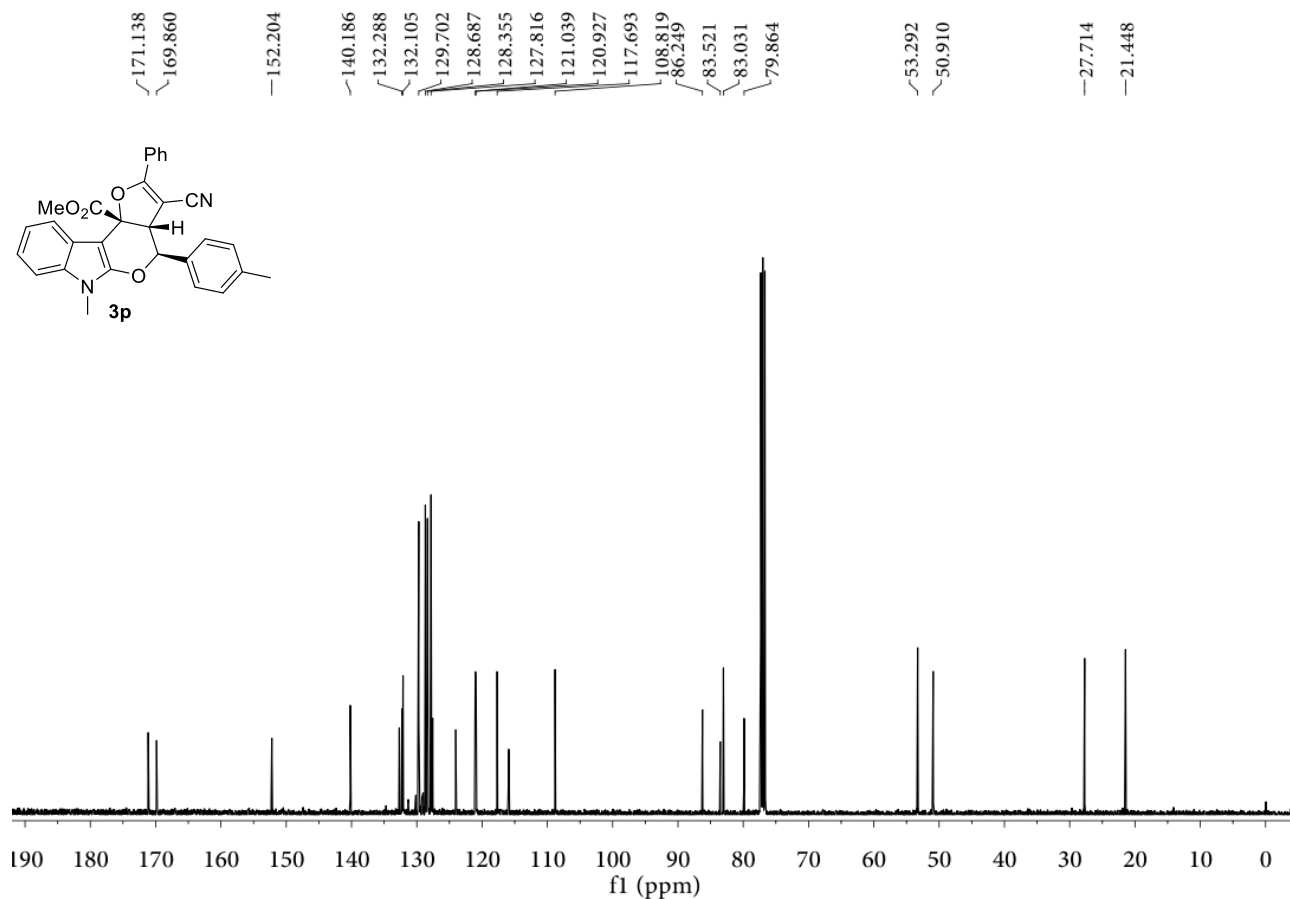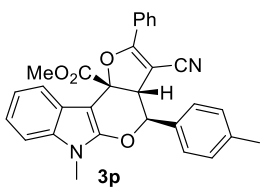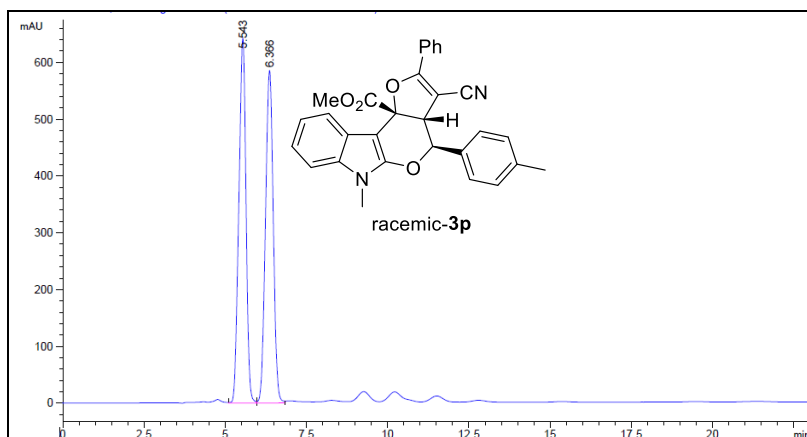

| Peak # | RetTime [min] | Type | Width [min] | Area mAU   | Area *s | Height [mAU] | Area %  |
|--------|---------------|------|-------------|------------|---------|--------------|---------|
| 1      | 5.543         | VV   | 0.2313      | 9835.90820 |         | 641.36163    | 50.2076 |
| 2      | 6.366         | VV   | 0.2644      | 9754.56543 |         | 584.93188    | 49.7924 |

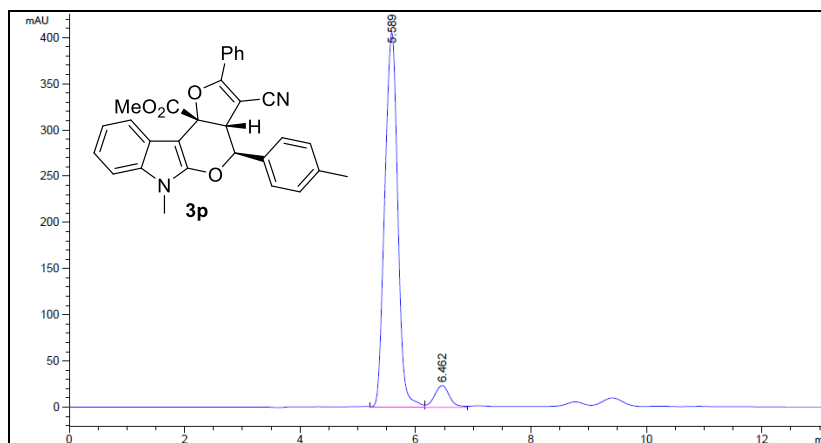

| Peak # | RetTime [min] | Type | Width [min] | Area mAU   | *s | Height [mAU] | Area %  |
|--------|---------------|------|-------------|------------|----|--------------|---------|
| 1      | 5.589         | VV   | 0.2522      | 6330.13721 |    | 405.13907    | 93.6727 |
| 2      | 6.462         | VV   | 0.2820      | 427.57843  |    | 23.51339     | 6.3273  |

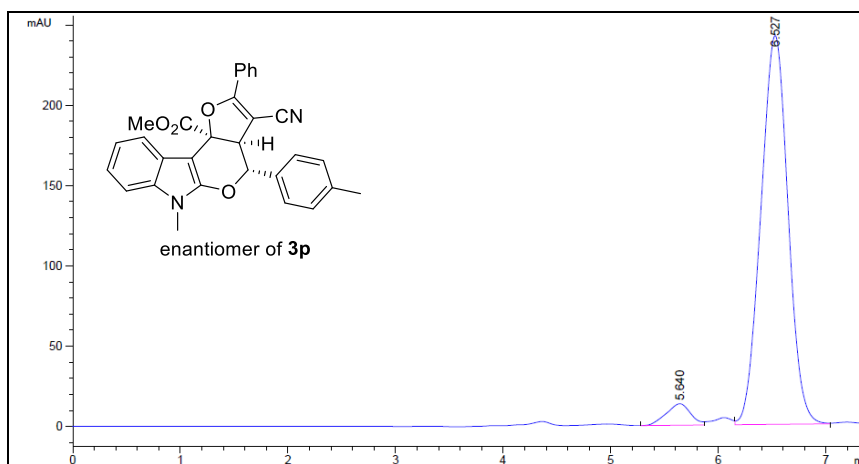

| Peak # | RetTime [min] | Type | Width [min] | Area mAU   | *s | Height [mAU] | Area %  |
|--------|---------------|------|-------------|------------|----|--------------|---------|
| 1      | 5.640         | VV   | 0.2364      | 210.49884  |    | 13.34438     | 4.7264  |
| 2      | 6.527         | VV   | 0.2746      | 4243.21875 |    | 241.79958    | 95.2736 |



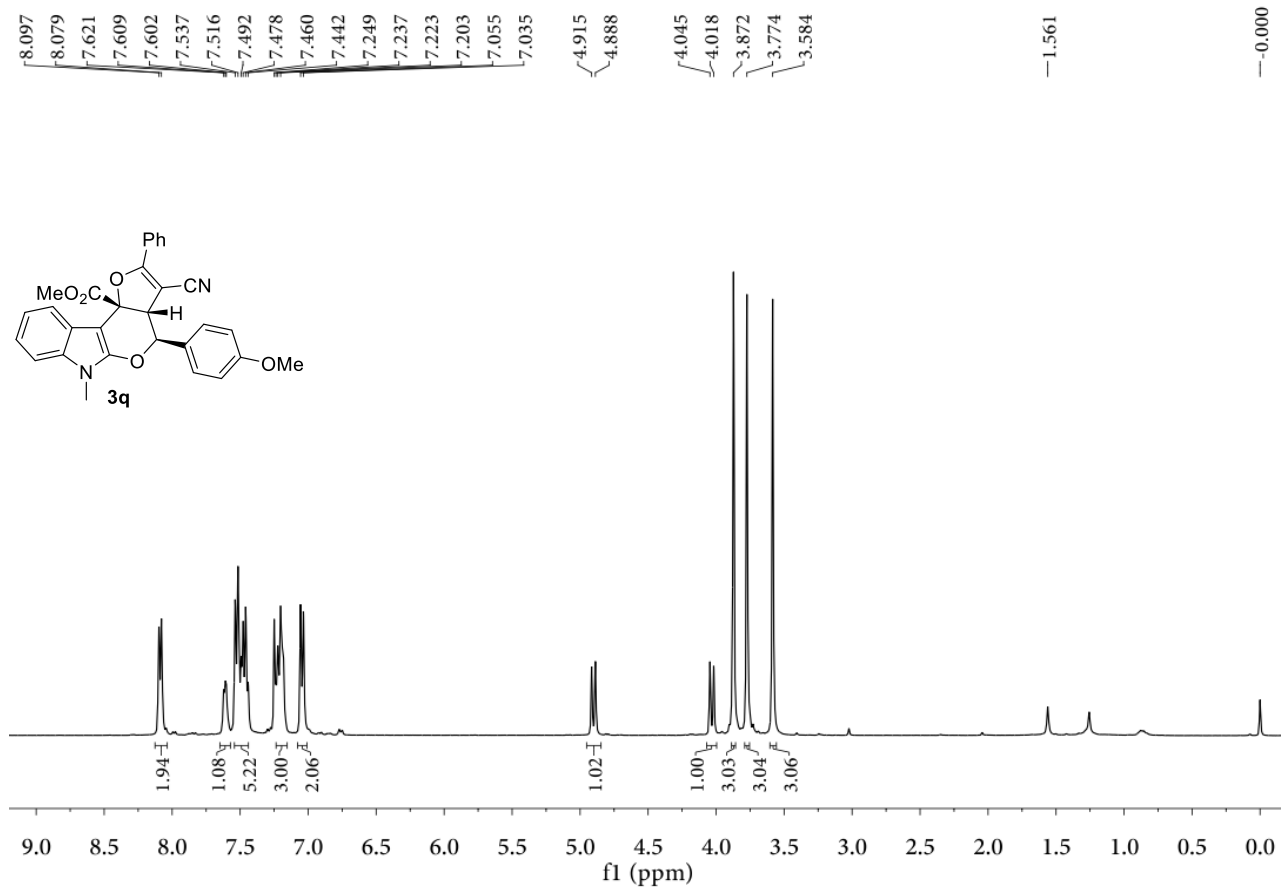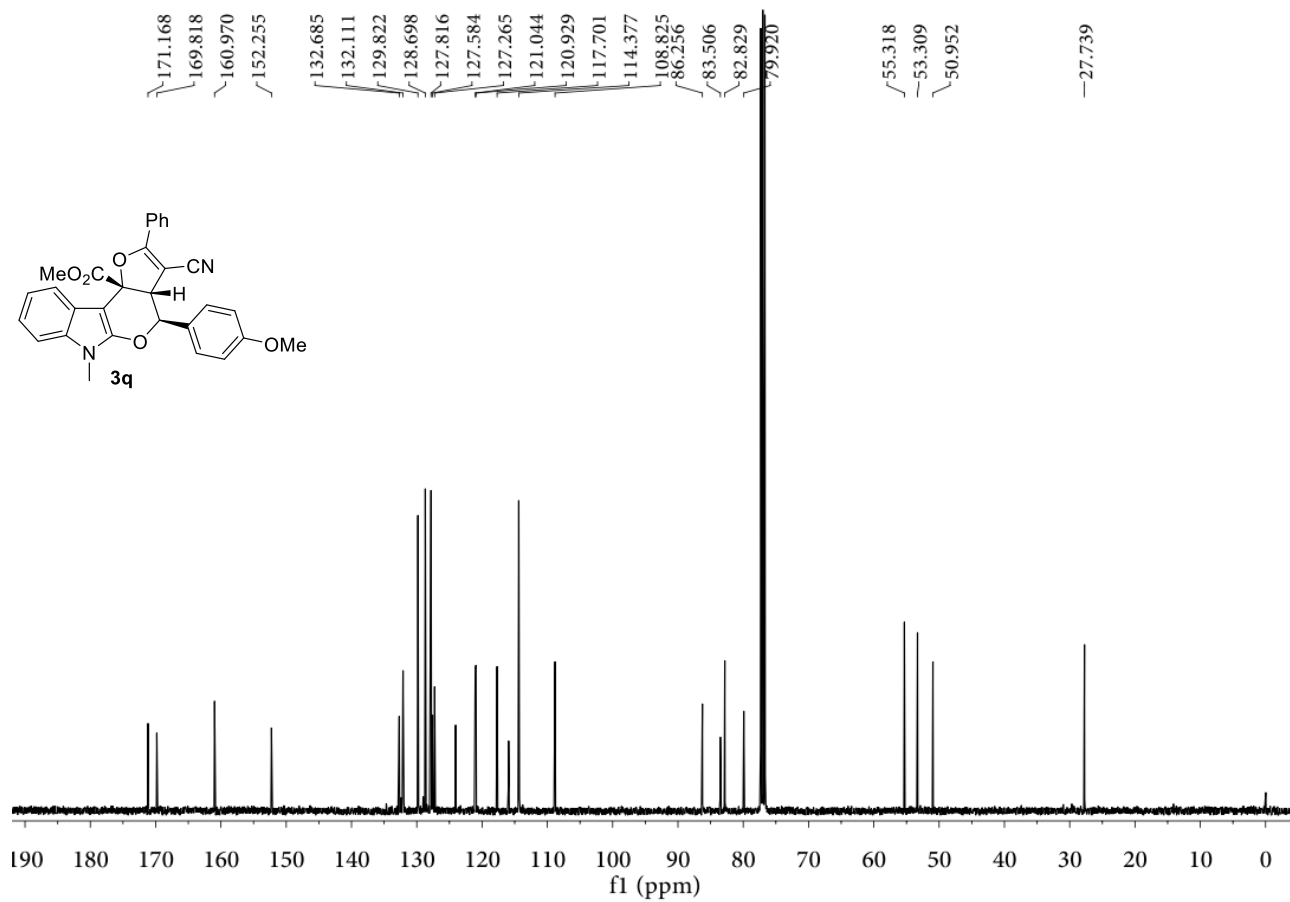

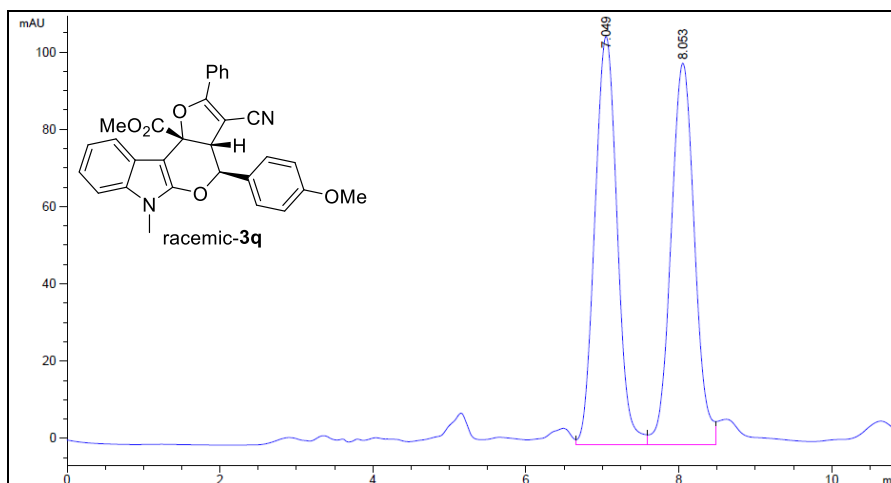

| Peak # | RetTime [min] | Type | Width [min] | Area mAU   | *s | Height [mAU] | Area %  |
|--------|---------------|------|-------------|------------|----|--------------|---------|
| 1      | 7.049         | VV   | 0.3177      | 2138.81274 |    | 105.65670    | 50.3326 |
| 2      | 8.053         | VV   | 0.3367      | 2110.54883 |    | 98.73692     | 49.6674 |

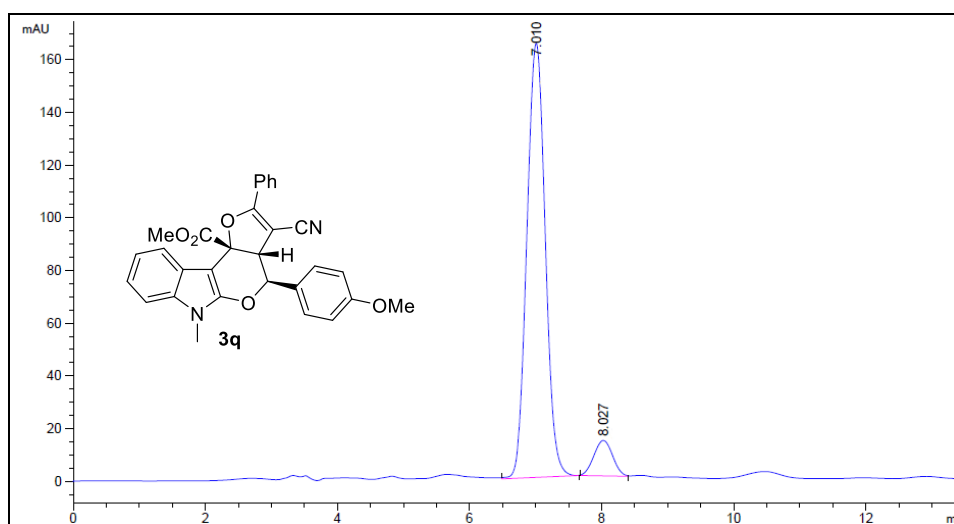

| Peak # | RetTime [min] | Type | Width [min] | Area mAU   | *s | Height [mAU] | Area %  |
|--------|---------------|------|-------------|------------|----|--------------|---------|
| 1      | 7.010         | MM   | 0.3219      | 3186.64355 |    | 165.00511    | 92.3195 |
| 2      | 8.027         | MM   | 0.3280      | 265.11169  |    | 13.47006     | 7.6805  |

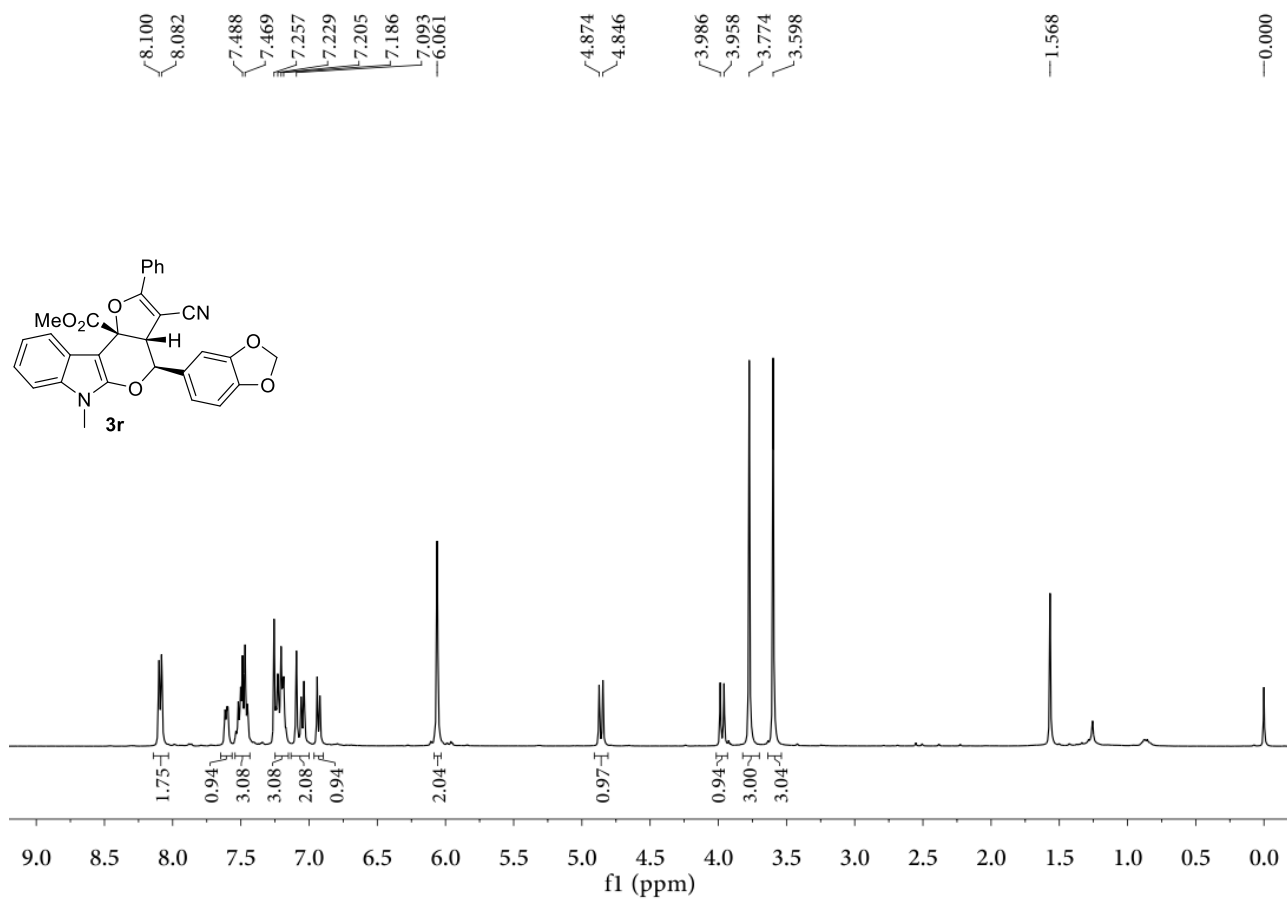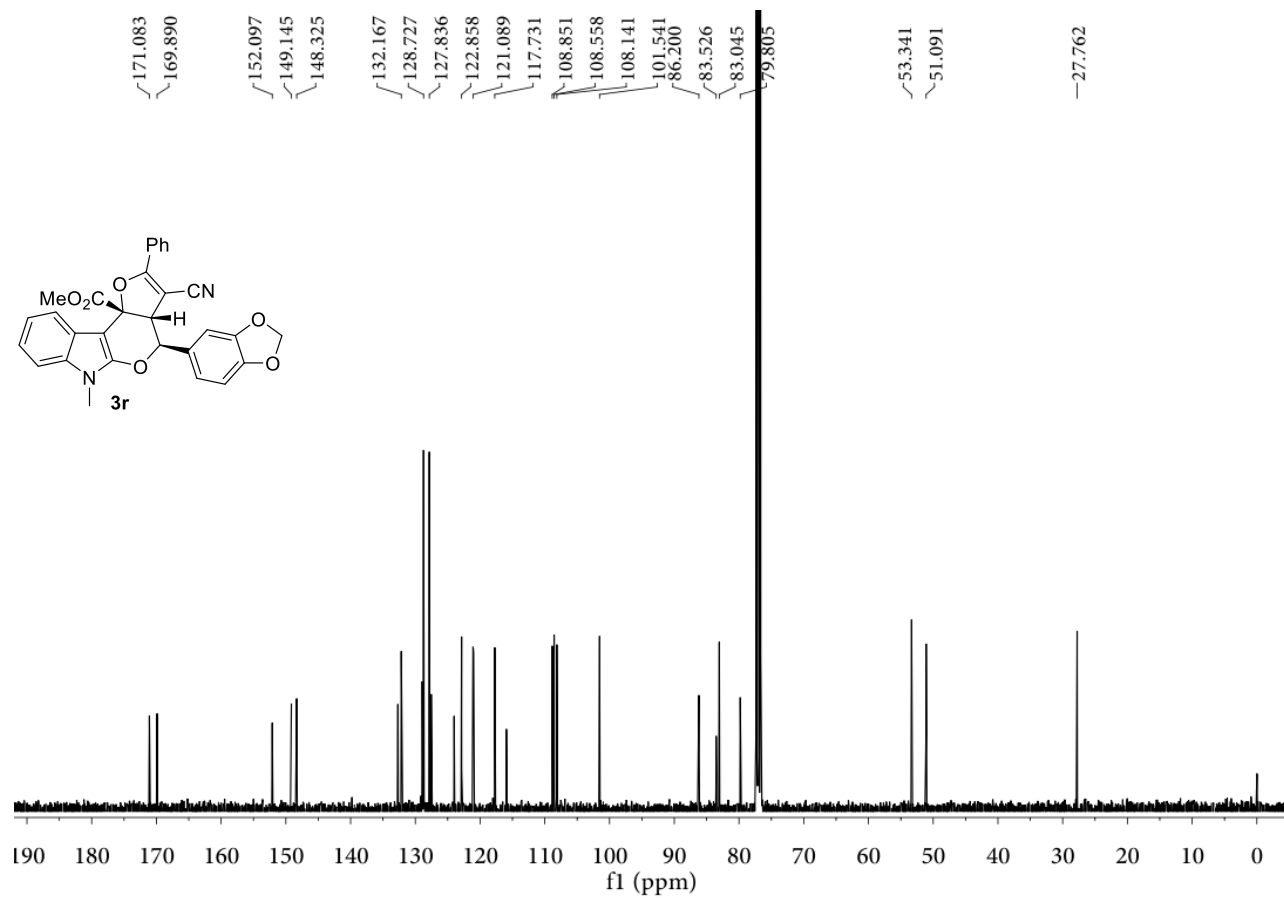

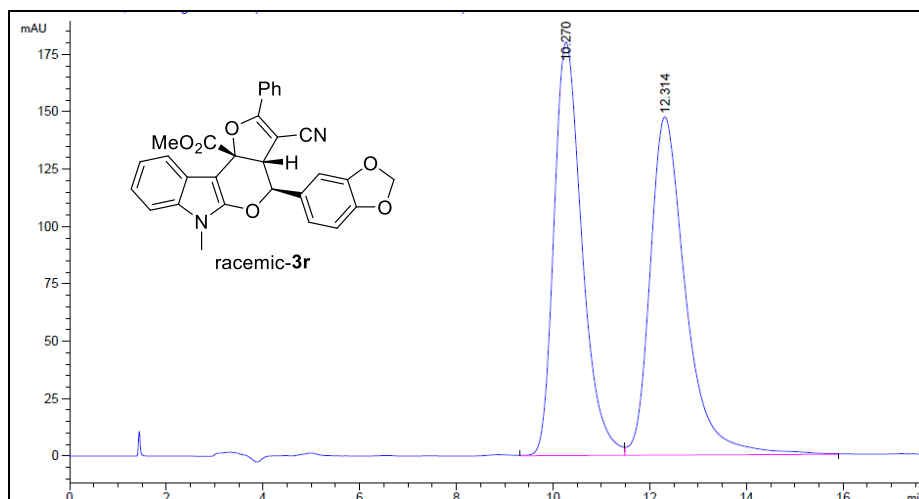

| Peak # | RetTime [min] | Type | Width [min] | Area mAU   | Area %  | Height [mAU] |
|--------|---------------|------|-------------|------------|---------|--------------|
| 1      | 10.270        | VV   | 0.6207      | 7245.58740 | 48.9911 | 180.11516    |
| 2      | 12.314        | VB   | 0.7779      | 7544.01221 | 51.0089 | 147.33261    |

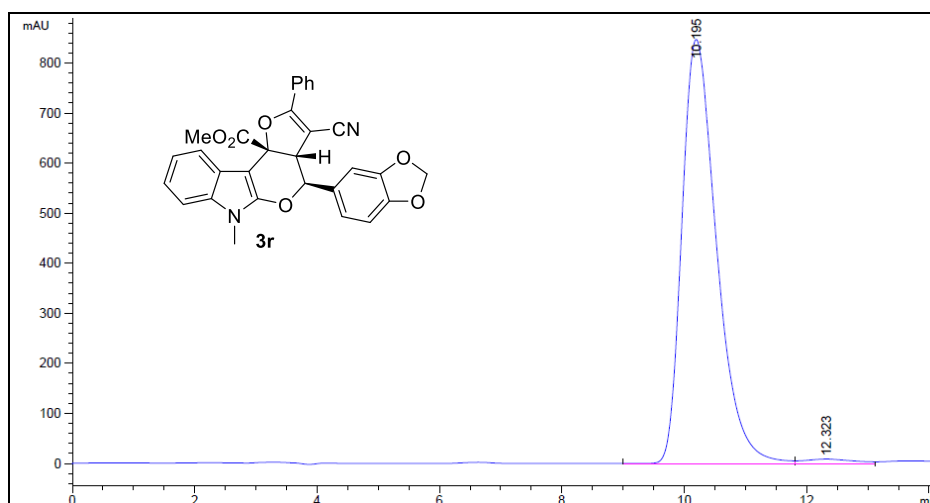

| Peak # | RetTime [min] | Type | Width [min] | Area mAU  | Area %  | Height [mAU] |
|--------|---------------|------|-------------|-----------|---------|--------------|
| 1      | 10.195        | BV   | 0.6047      | 3.33298e4 | 98.5213 | 846.93634    |
| 2      | 12.323        | VV   | 0.8172      | 500.24554 | 1.4787  | 8.92203      |

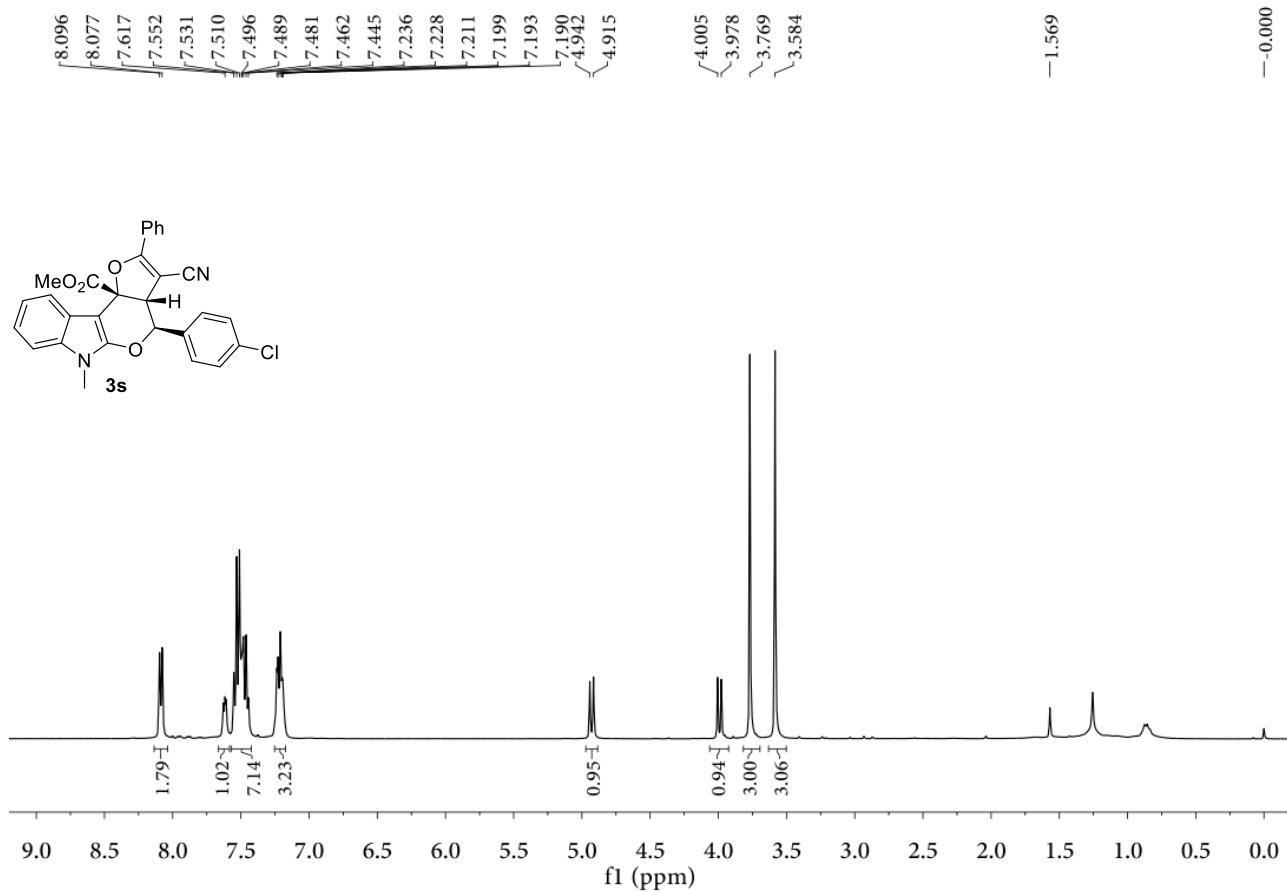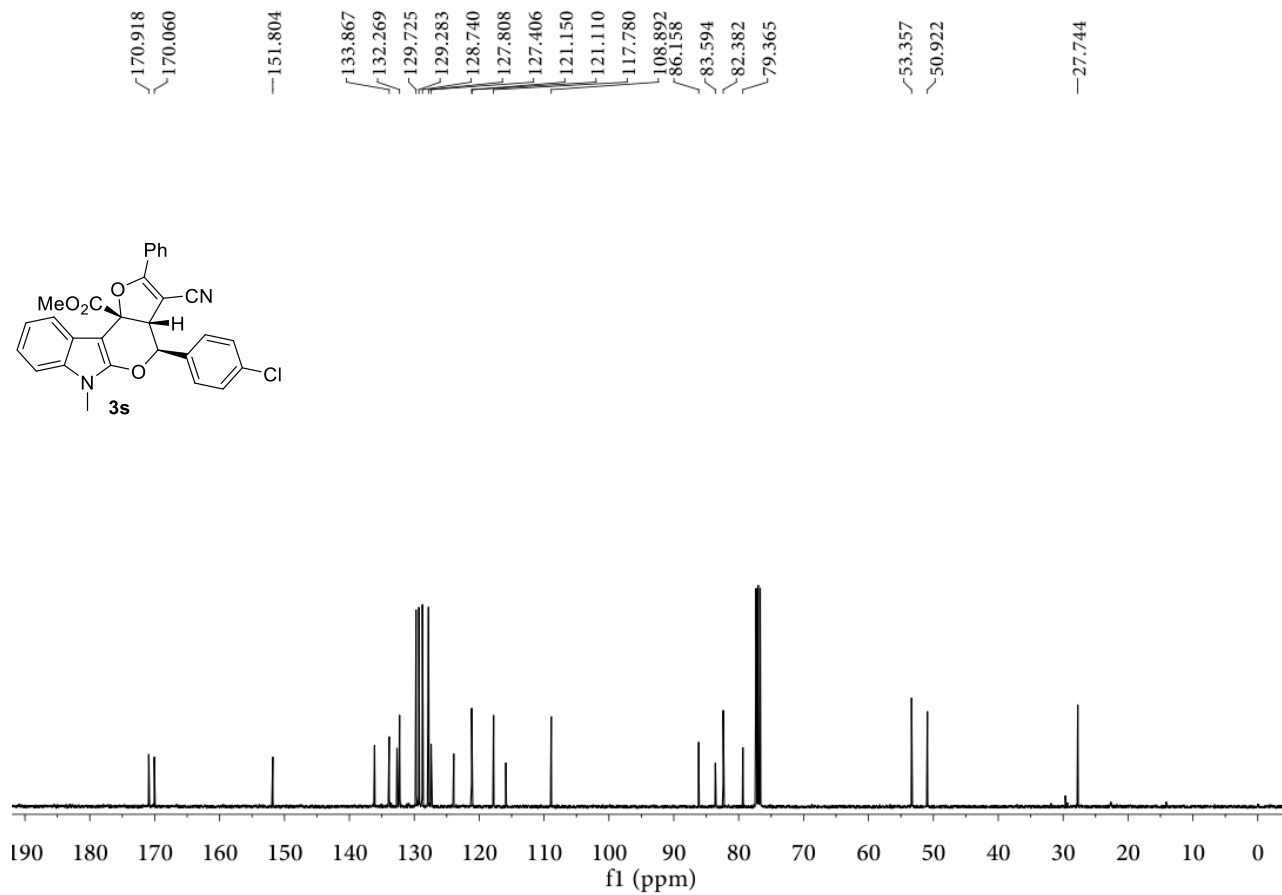

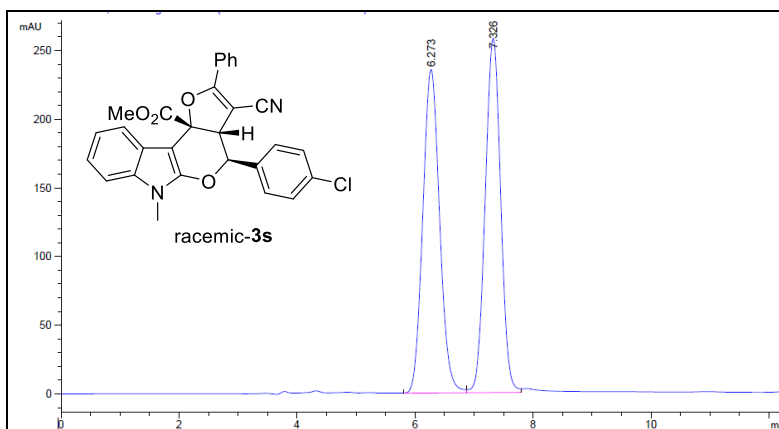

| Peak # | RetTime [min] | Type | Width [min] | Area mAU   | Area *s | Height [mAU] | Area %  |
|--------|---------------|------|-------------|------------|---------|--------------|---------|
| 1      | 6.273         | BV   | 0.3070      | 4667.60938 |         | 235.41473    | 49.8306 |
| 2      | 7.326         | VV   | 0.2884      | 4699.35254 |         | 257.75470    | 50.1694 |

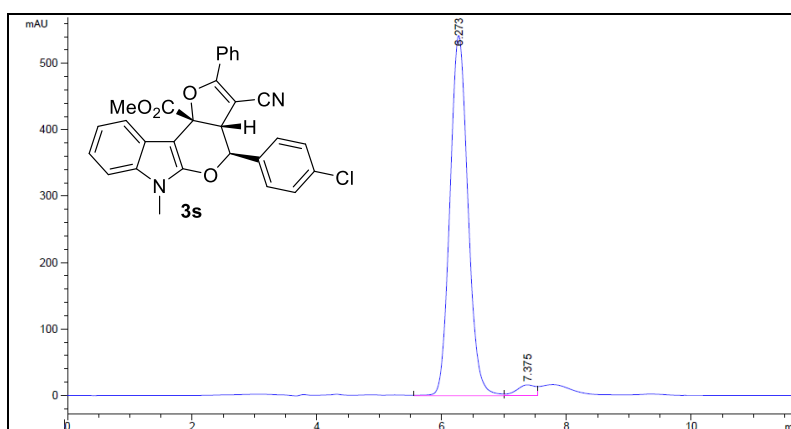

| Peak # | RetTime [min] | Type | Width [min] | Area mAU  | Area *s | Height [mAU] | Area %  |
|--------|---------------|------|-------------|-----------|---------|--------------|---------|
| 1      | 6.273         | VV   | 0.3097      | 1.08659e4 |         | 541.83704    | 96.9622 |
| 2      | 7.375         | VV   | 0.3144      | 340.43130 |         | 16.24006     | 3.0378  |

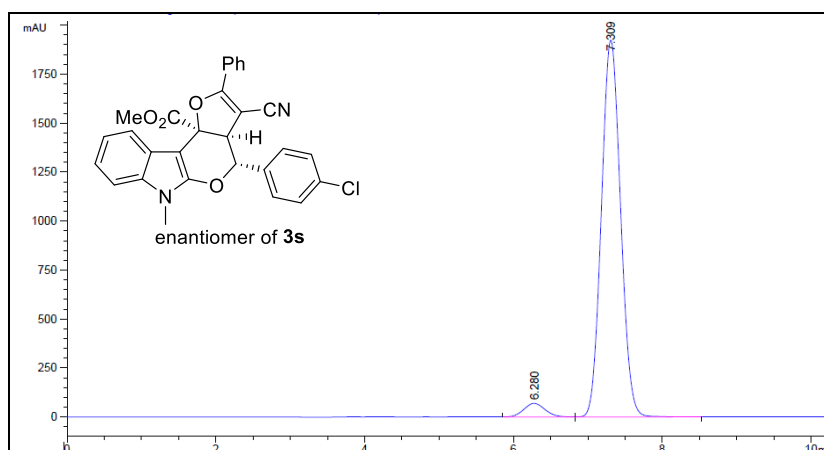

| Peak # | RetTime [min] | Type | Width [min] | Area mAU   | Area *s | Height [mAU] | Area %  |
|--------|---------------|------|-------------|------------|---------|--------------|---------|
| 1      | 6.280         | VV   | 0.3105      | 1406.95361 |         | 69.91431     | 3.9311  |
| 2      | 7.309         | VB   | 0.2845      | 3.43837e4  |         | 1921.62354   | 96.0689 |

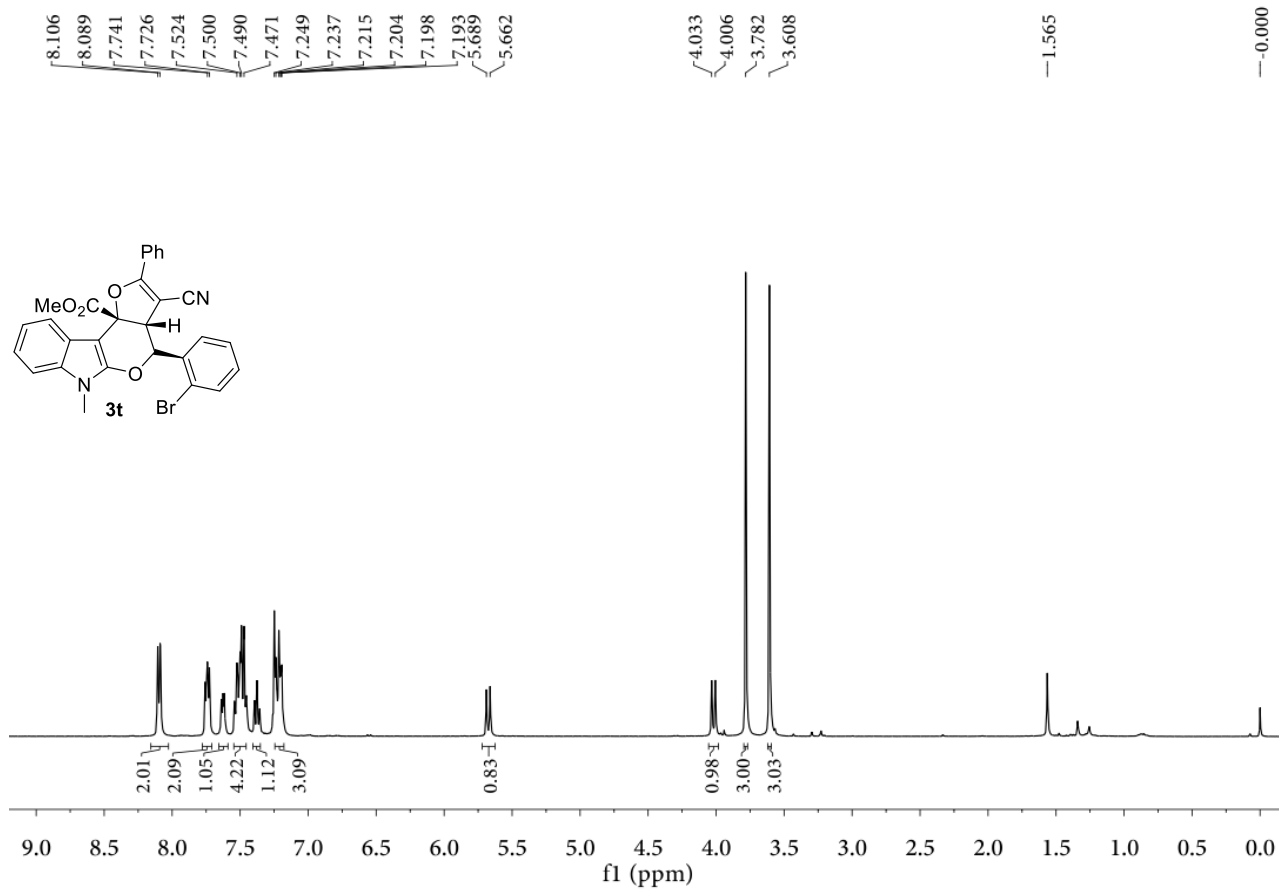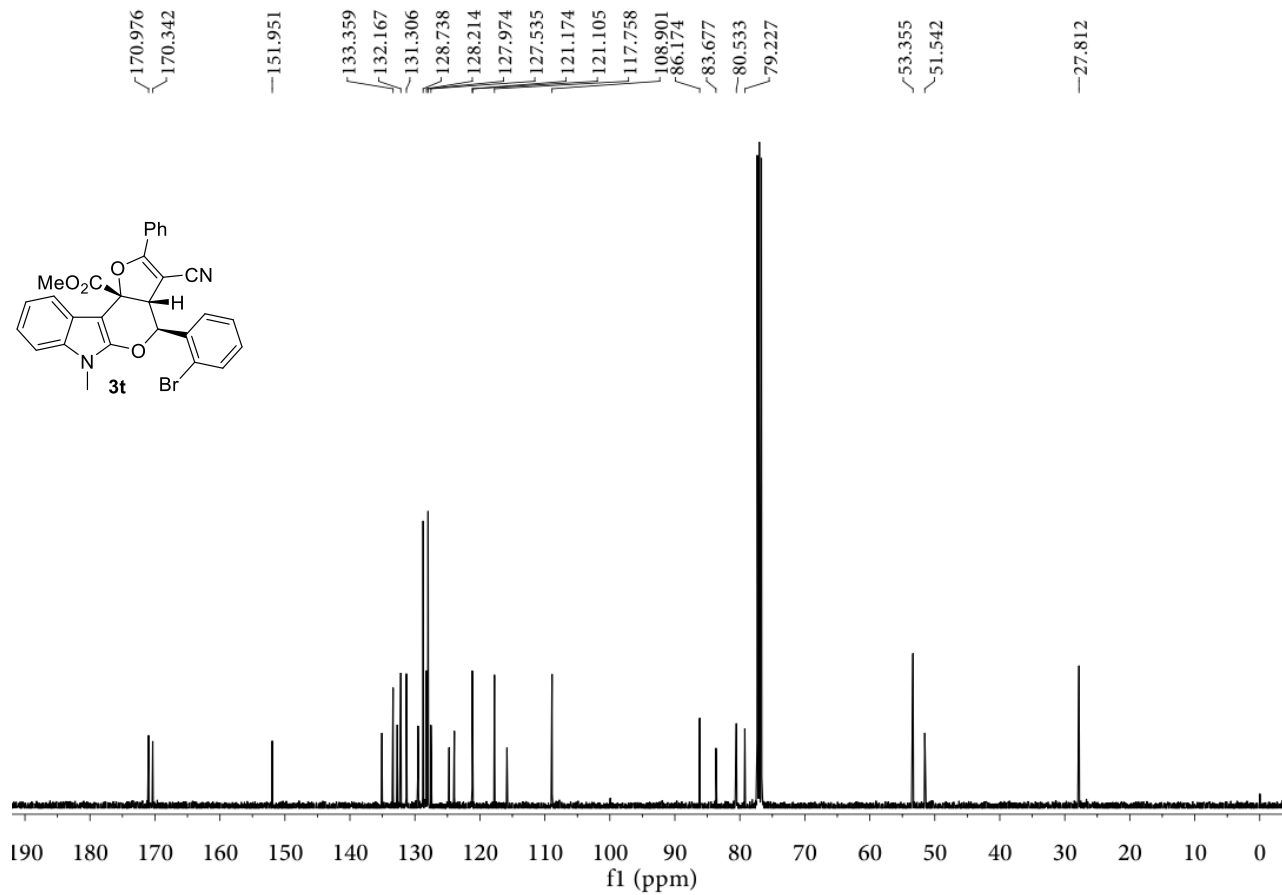

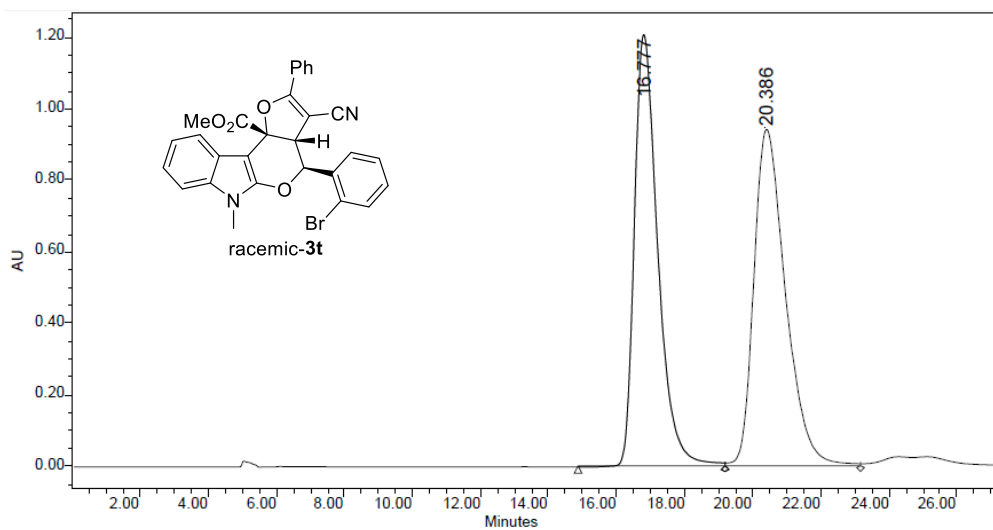

|   | RT (min) | Area (*sec) | % Area | Height ( ) | % Height |
|---|----------|-------------|--------|------------|----------|
| 1 | 16.777   | 57881654    | 48.71  | 1208925    | 56.19    |
| 2 | 20.386   | 60954411    | 51.29  | 942448     | 43.81    |

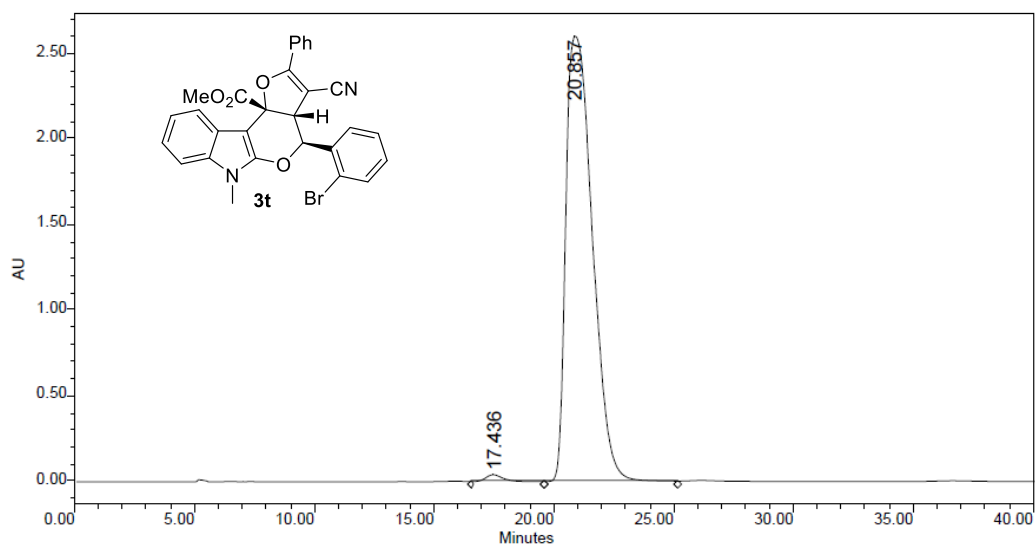

|   | RT (min) | Area (*sec) | % Area | Height ( ) | % Height |
|---|----------|-------------|--------|------------|----------|
| 1 | 17.436   | 1998795     | 0.99   | 39772      | 1.50     |
| 2 | 20.857   | 200327687   | 99.01  | 2603961    | 98.50    |



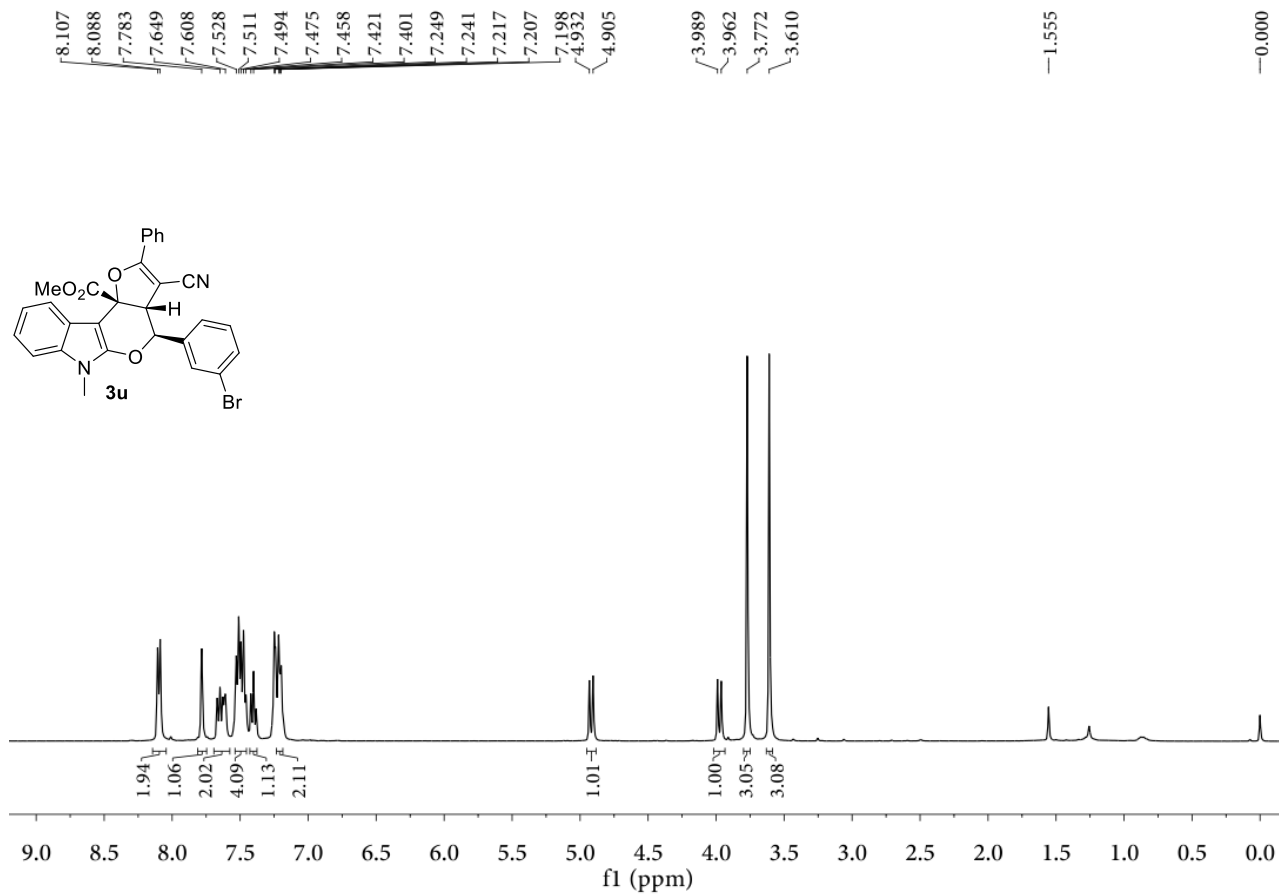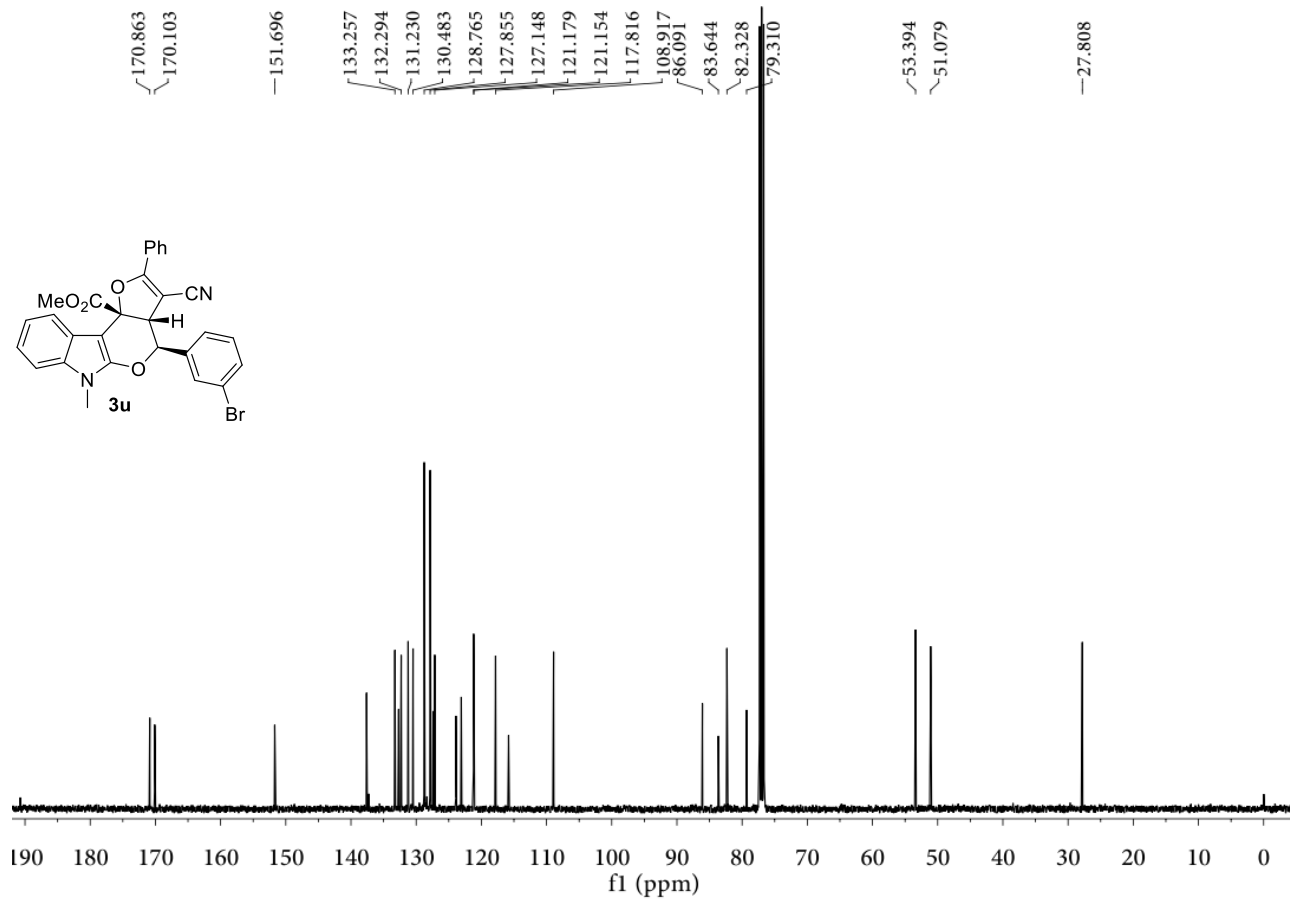

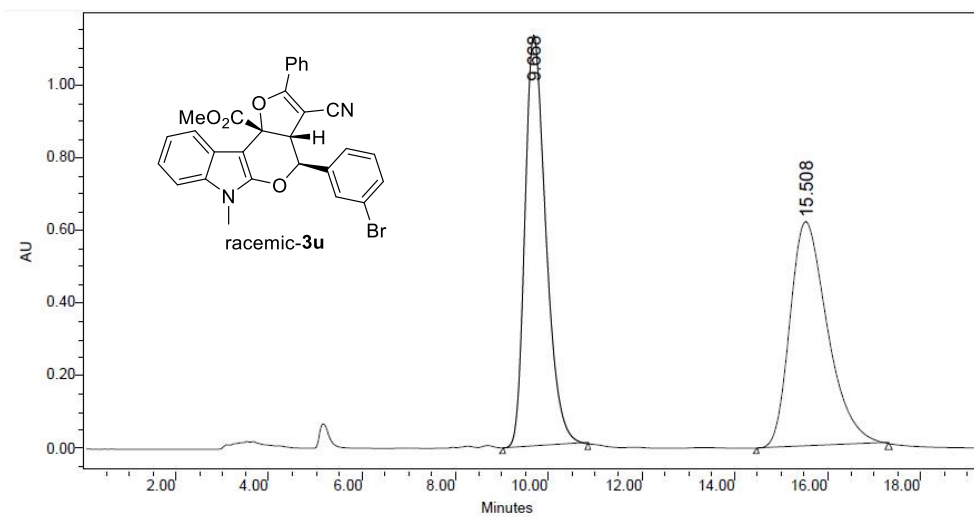

|   | RT (min) | Area ( *sec) | % Area | Height ( ) | % Height |
|---|----------|--------------|--------|------------|----------|
| 1 | 9.668    | 35418288     | 50.40  | 1131508    | 64.64    |
| 2 | 15.508   | 34859033     | 49.60  | 618860     | 35.36    |

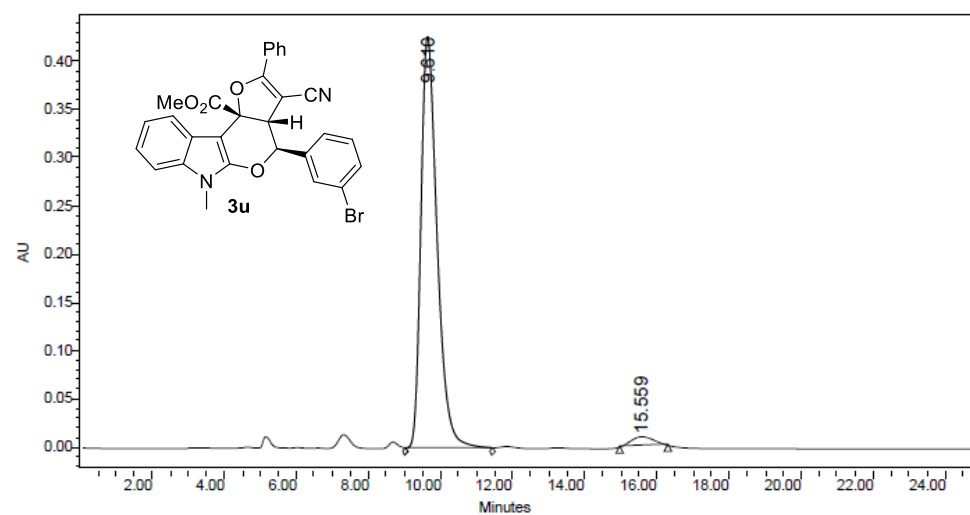

|   | RT (min) | Area ( *sec) | % Area | Height ( ) | % Height |
|---|----------|--------------|--------|------------|----------|
| 1 | 9.610    | 13387401     | 96.91  | 427175     | 97.77    |
| 2 | 15.559   | 426891       | 3.09   | 9744       | 2.23     |

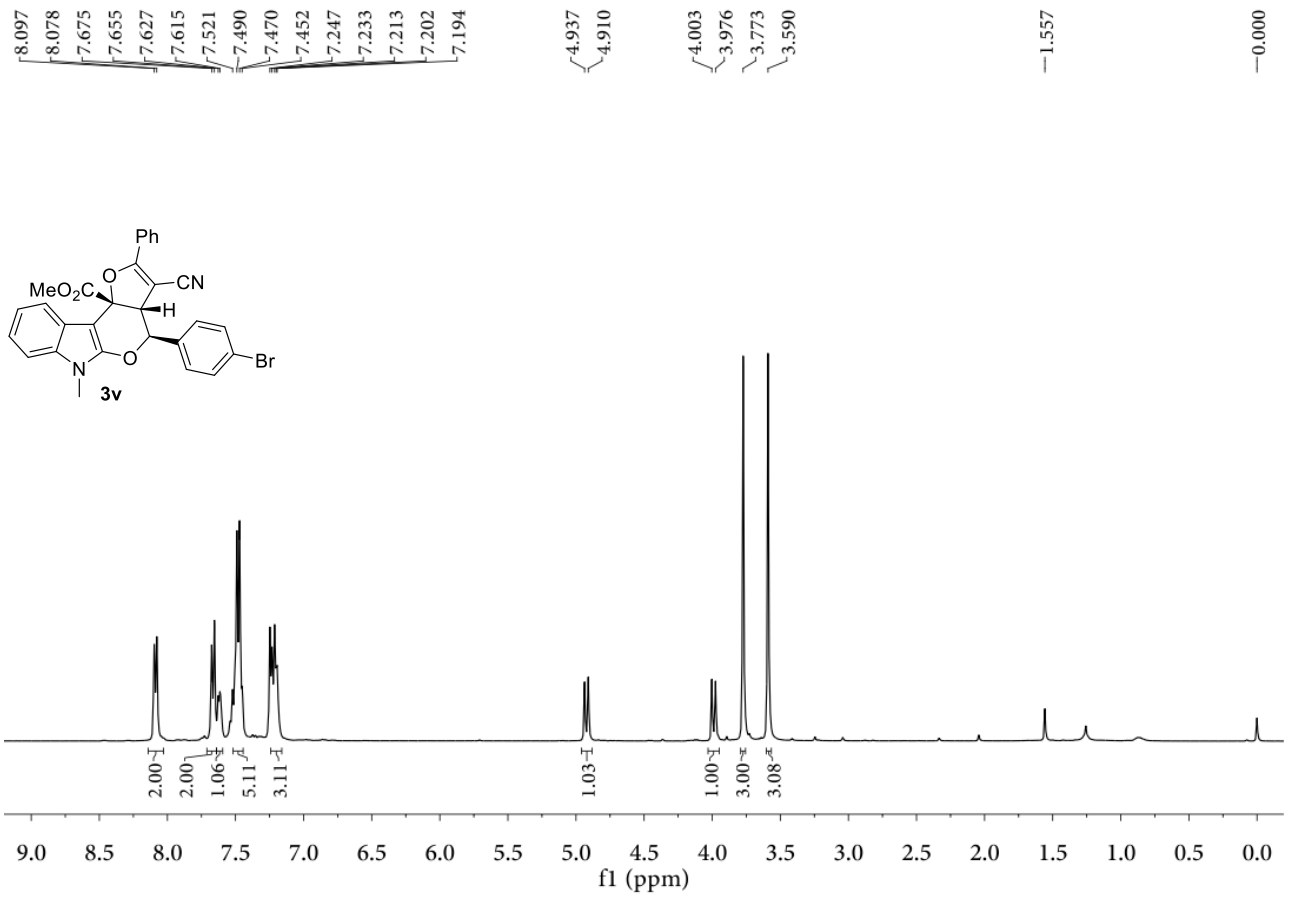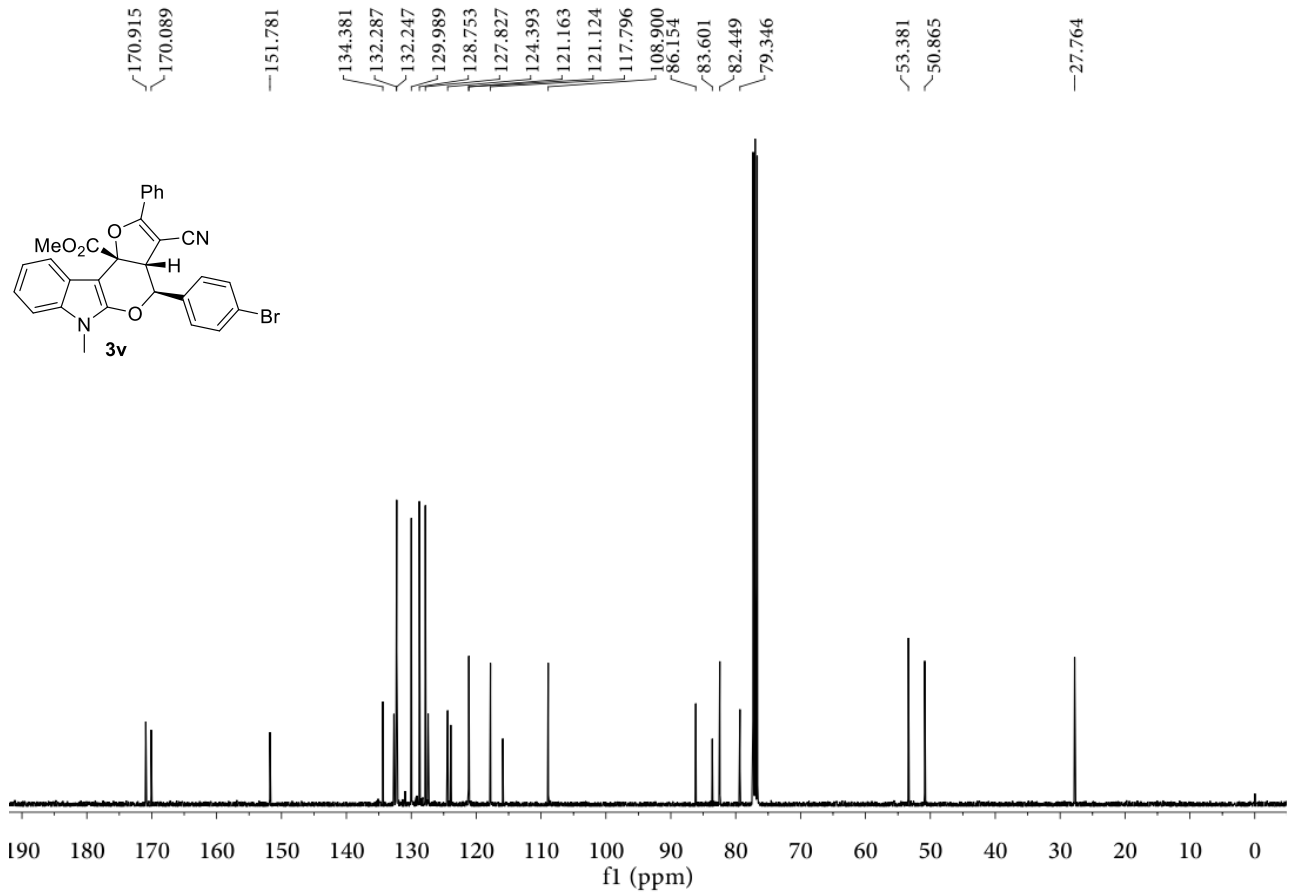

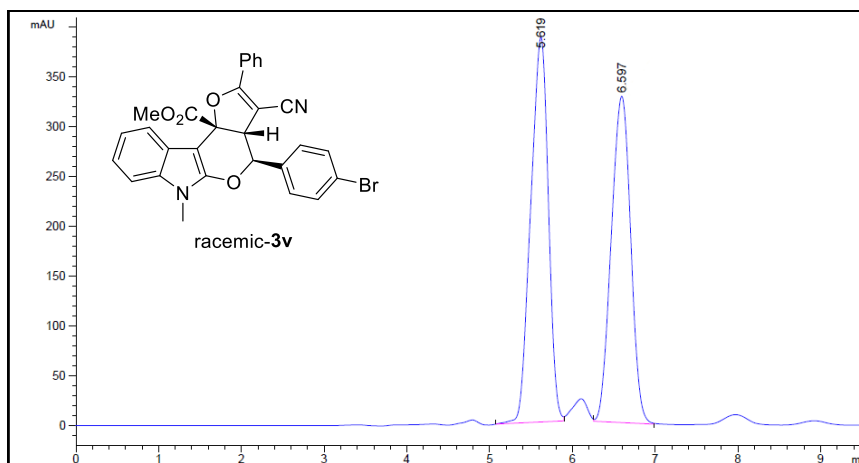

| Peak # | RetTime [min] | Type | Width [min] | Area mAU   | Area *s | Height [mAU] | Area %  |
|--------|---------------|------|-------------|------------|---------|--------------|---------|
| 1      | 5.619         | BV   | 0.2429      | 5717.28174 |         | 385.47632    | 51.6942 |
| 2      | 6.597         | MM   | 0.2716      | 5342.52393 |         | 327.80688    | 48.3058 |

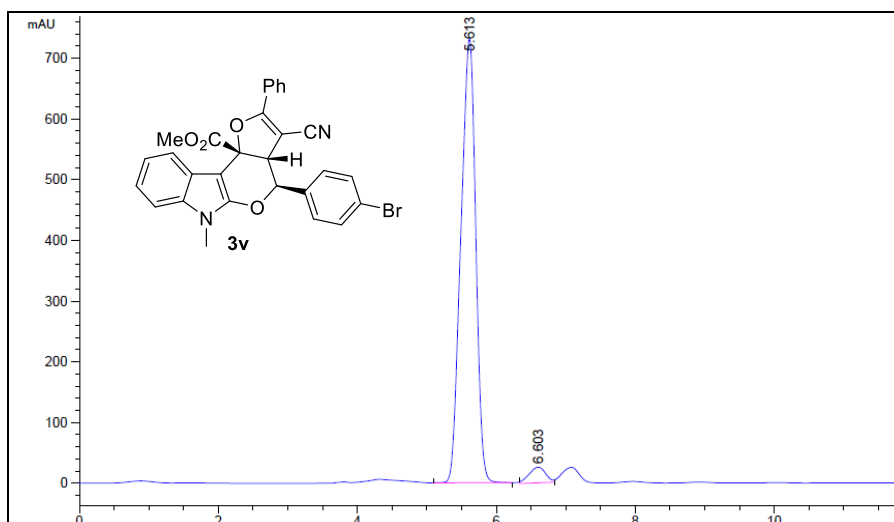

| Peak # | RetTime [min] | Type | Width [min] | Area mAU  | Area *s | Height [mAU] | Area %  |
|--------|---------------|------|-------------|-----------|---------|--------------|---------|
| 1      | 5.613         | BBA  | 0.2485      | 1.08201e4 |         | 730.55878    | 96.1926 |
| 2      | 6.603         | MM   | 0.2772      | 428.27133 |         | 25.74760     | 3.8074  |

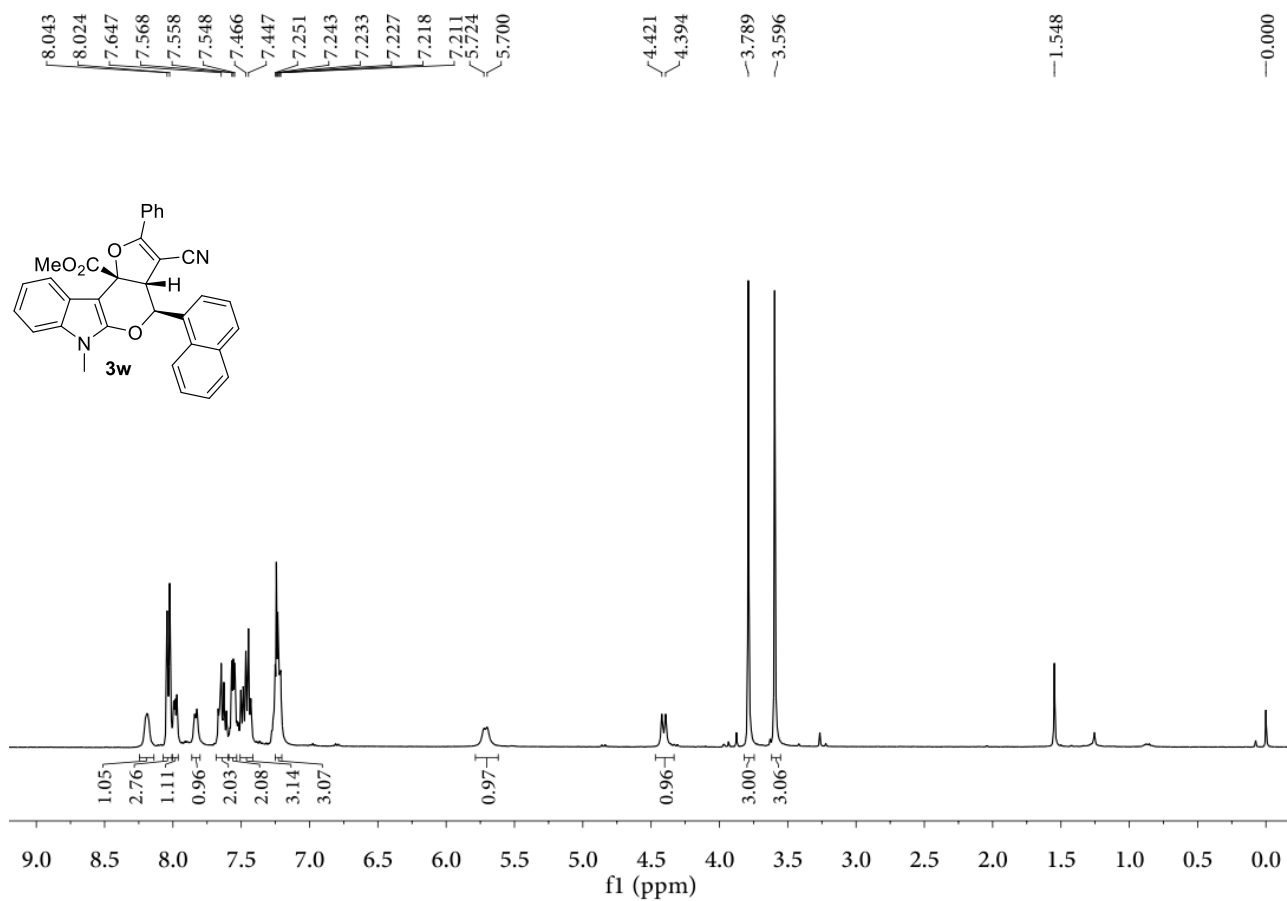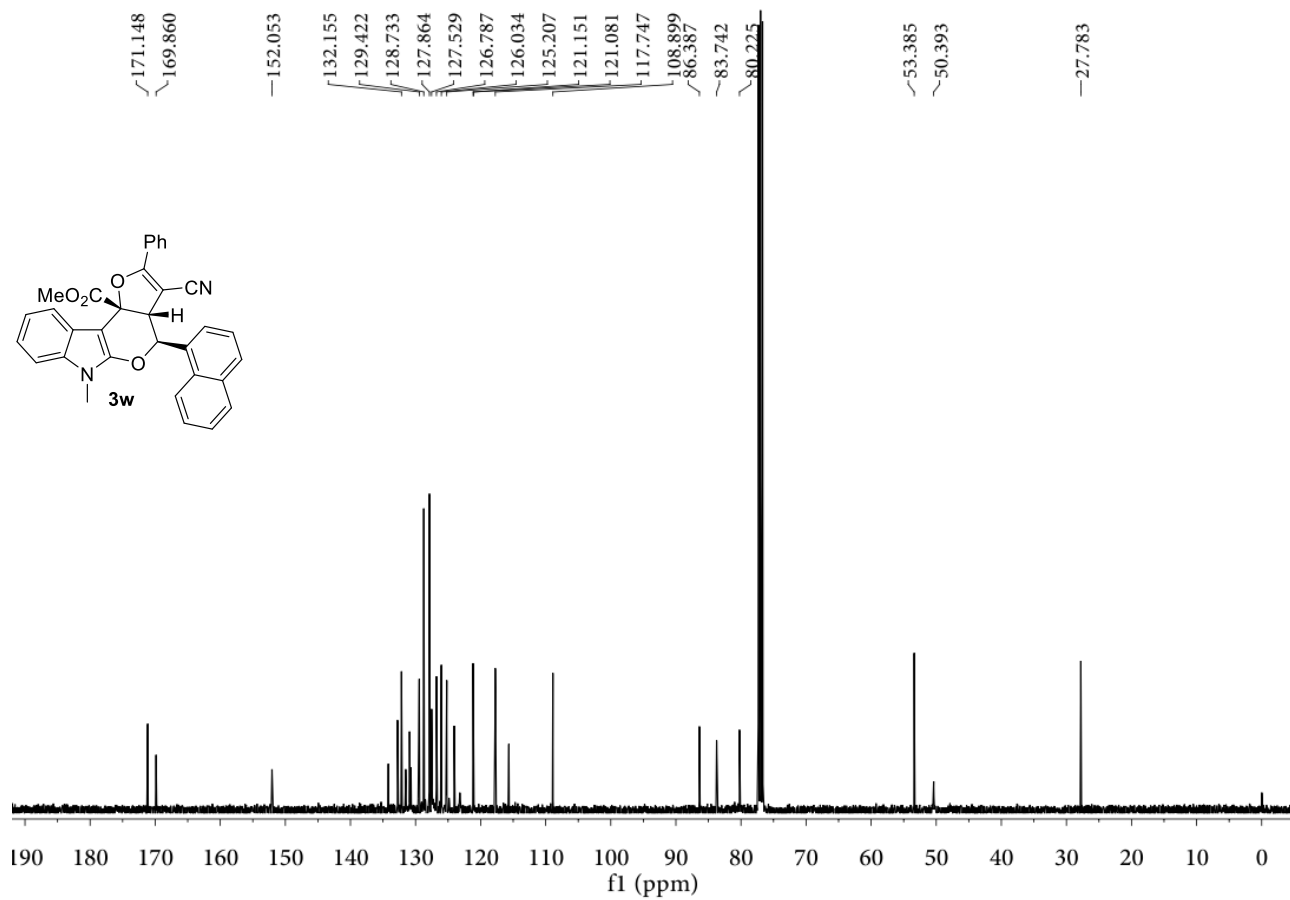

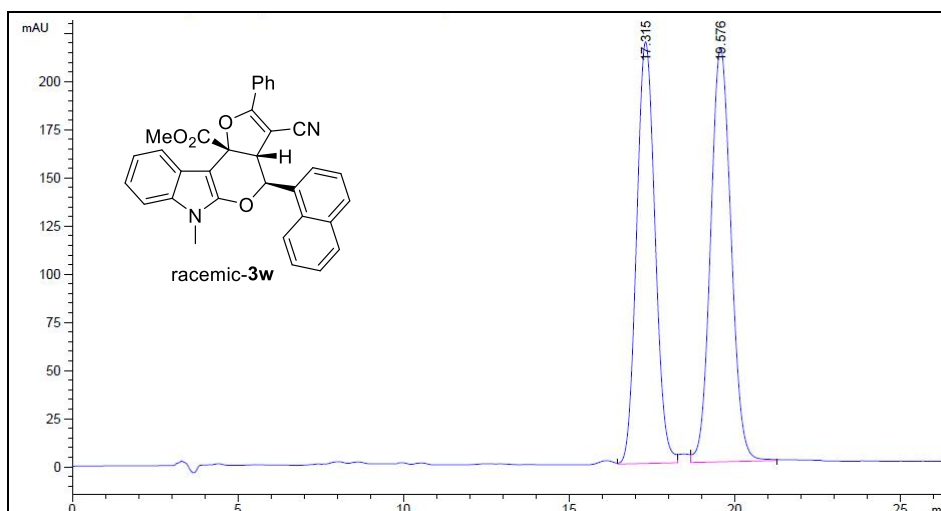

| Peak # | RetTime [min] | Type | Width [min] | Area mAU *s | Height [mAU] | Area %  |
|--------|---------------|------|-------------|-------------|--------------|---------|
| 1      | 17.315        | VV   | 0.6085      | 8463.36328  | 218.82716    | 47.7928 |
| 2      | 19.576        | VB   | 0.6764      | 9245.08008  | 215.01561    | 52.2072 |

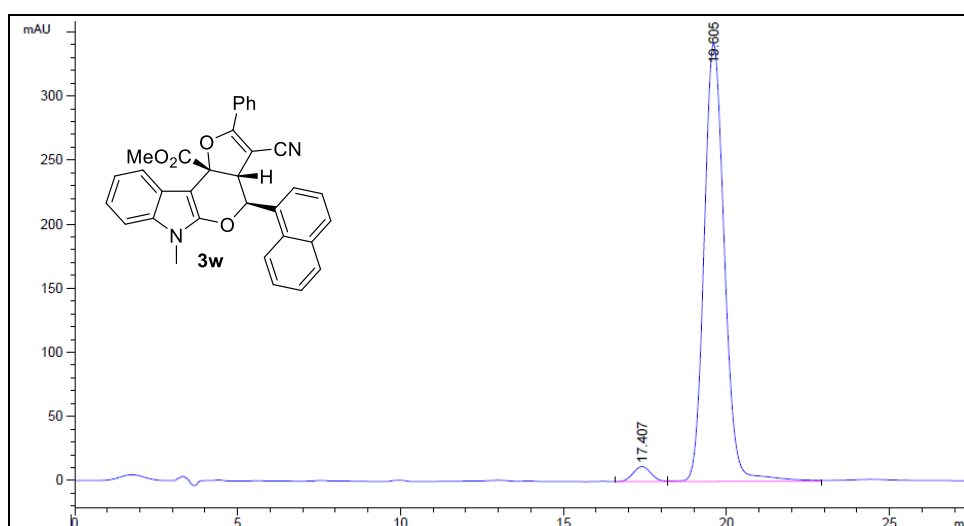

| Peak # | RetTime [min] | Type | Width [min] | Area mAU *s | Height [mAU] | Area %  |
|--------|---------------|------|-------------|-------------|--------------|---------|
| 1      | 17.407        | VV   | 0.6001      | 442.86618   | 11.66684     | 2.9182  |
| 2      | 19.605        | VB   | 0.6721      | 1.47332e4   | 341.56509    | 97.0818 |

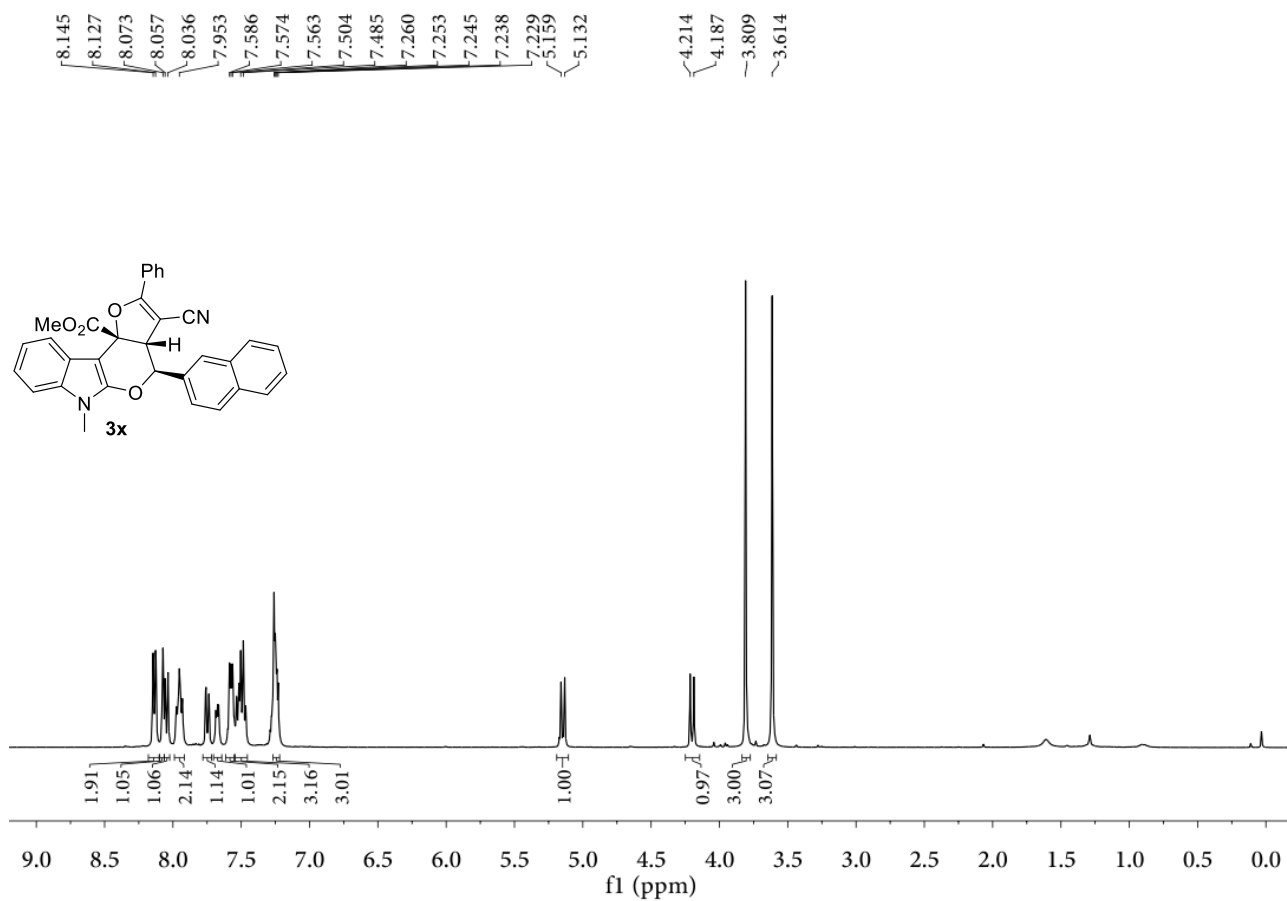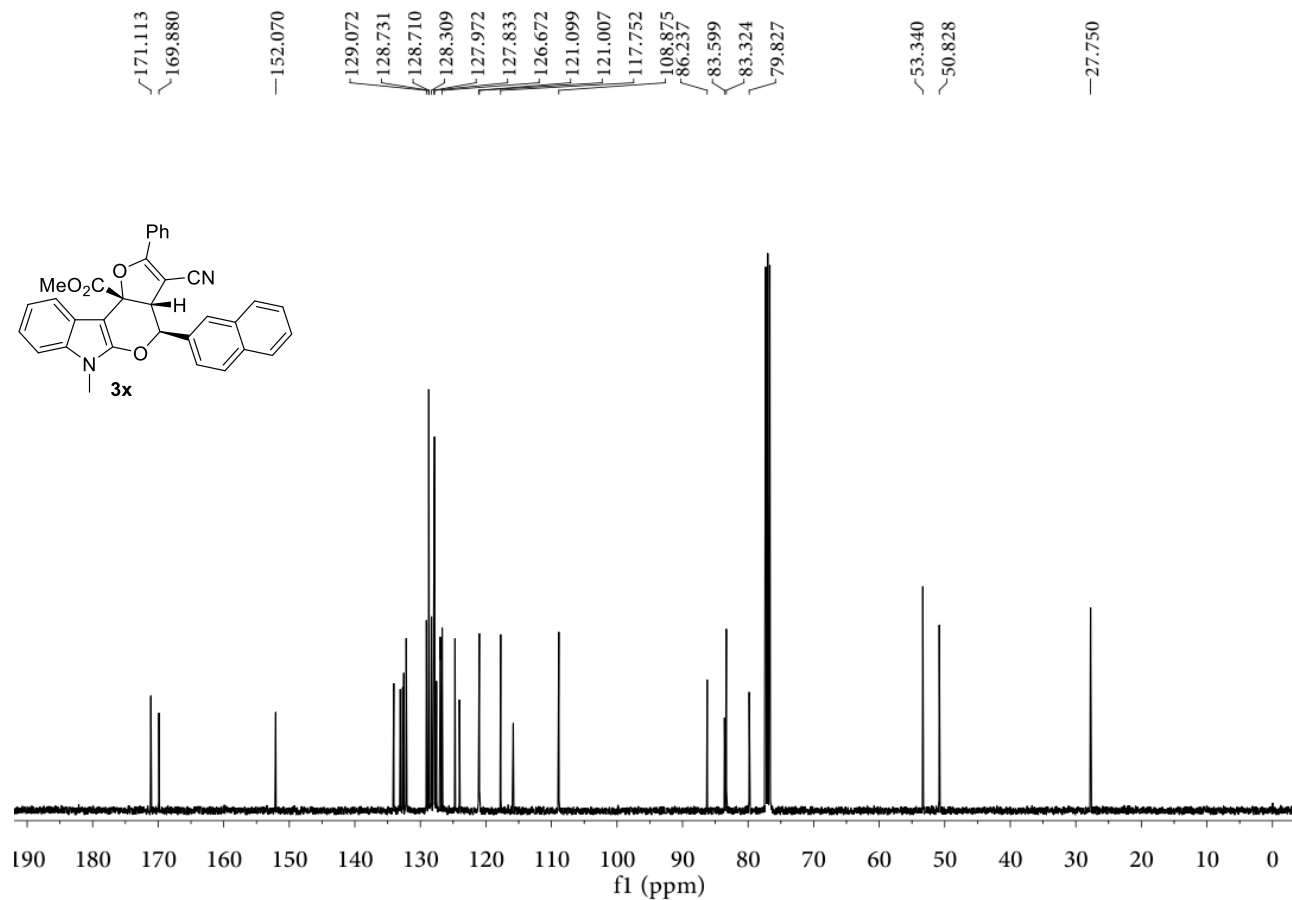

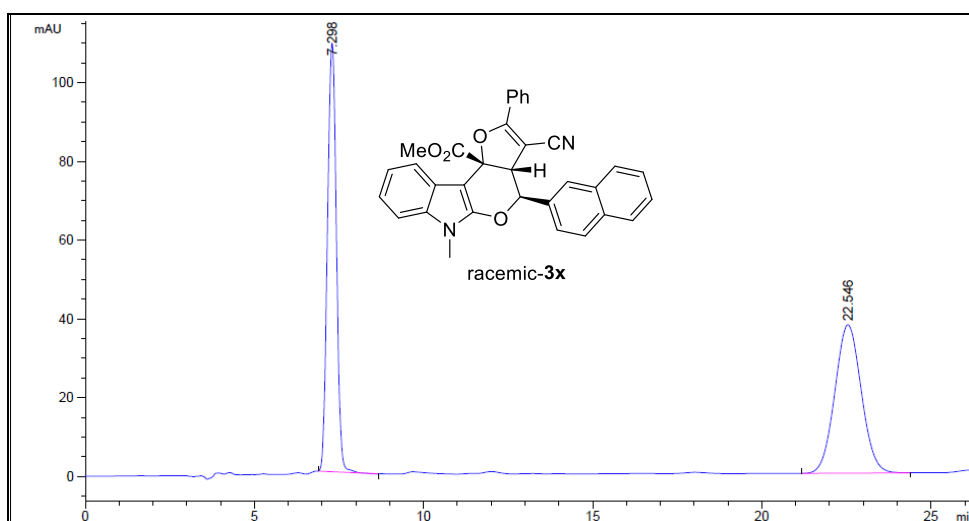

| Peak # | RetTime [min] | Type | Width [min] | Area mAU   | Area *s | Height [mAU] | Area %  |
|--------|---------------|------|-------------|------------|---------|--------------|---------|
| 1      | 7.298         | BB   | 0.2893      | 1991.24109 |         | 108.74486    | 49.2790 |
| 2      | 22.546        | BB   | 0.8501      | 2049.50757 |         | 37.67701     | 50.7210 |

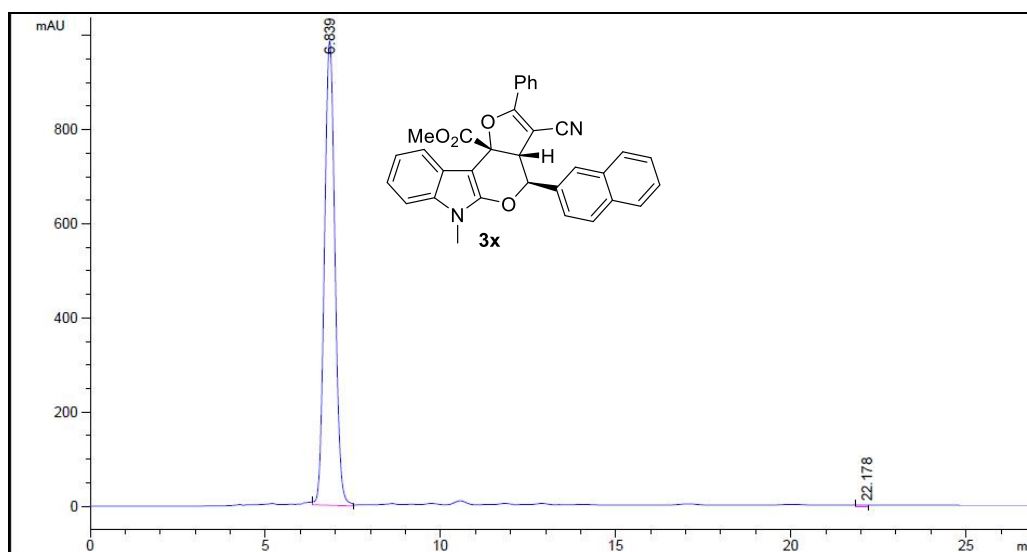

| Peak # | RetTime [min] | Type | Width [min] | Area mAU  | Area *s | Height [mAU] | Area %  |
|--------|---------------|------|-------------|-----------|---------|--------------|---------|
| 1      | 6.839         | MM   | 0.3454      | 2.04596e4 |         | 987.21710    | 99.6623 |
| 2      | 22.178        | MM   | 0.3646      | 69.32738  |         | 3.16894      | 0.3377  |



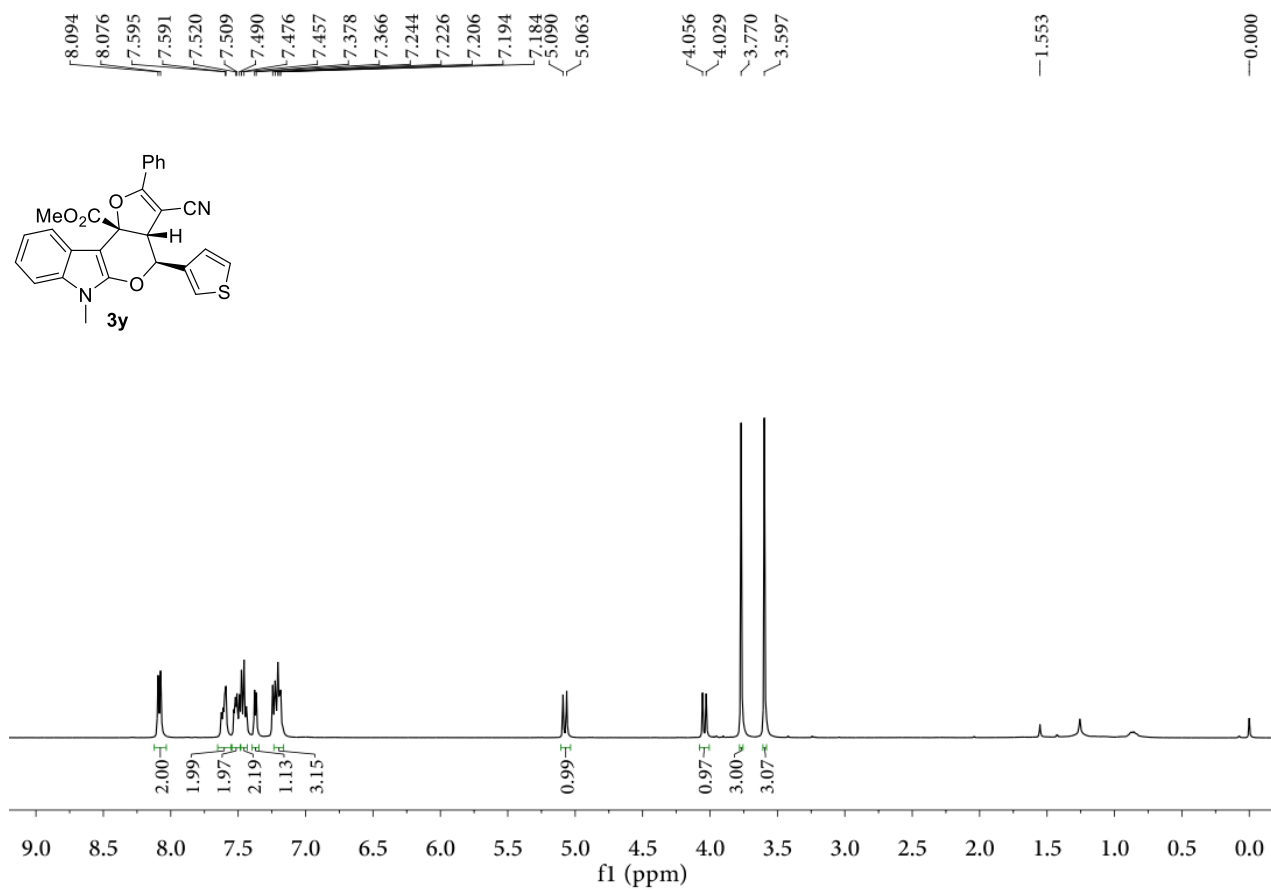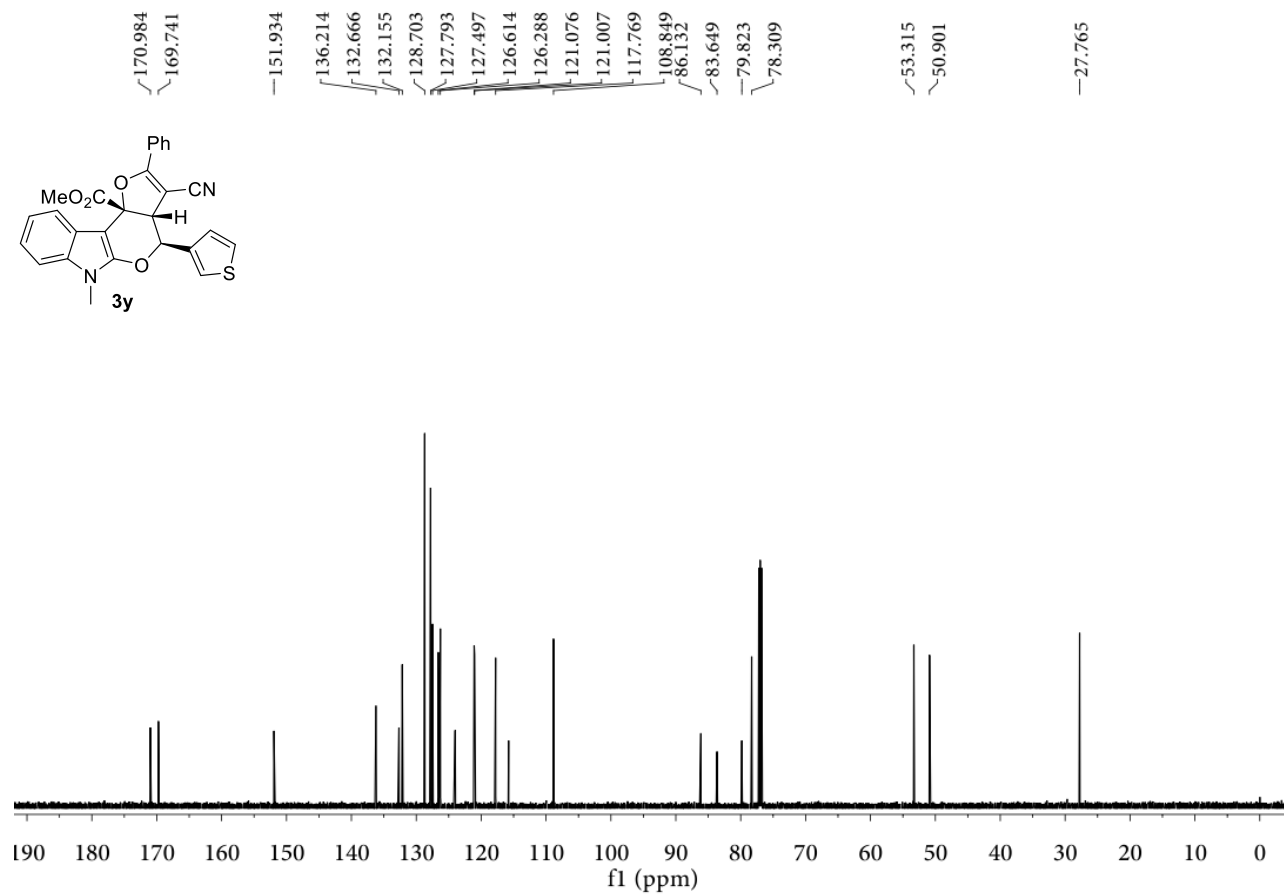

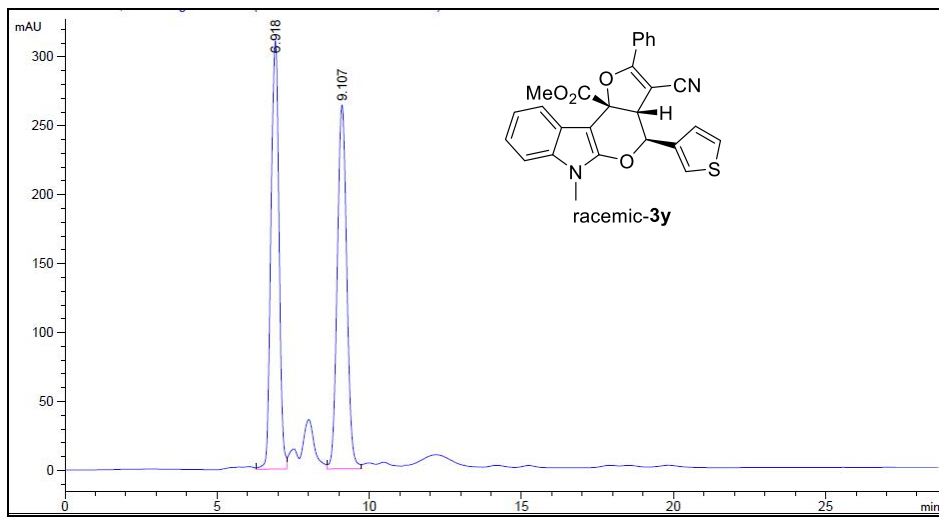

| Peak # | RetTime [min] | Type | Width [min] | Area mAU   | Area *s | Height [mAU] | Area %  |
|--------|---------------|------|-------------|------------|---------|--------------|---------|
| 1      | 6.918         | VV   | 0.2967      | 5725.08545 |         | 310.43542    | 49.8996 |
| 2      | 9.107         | VV   | 0.3474      | 5748.12158 |         | 263.75644    | 50.1004 |

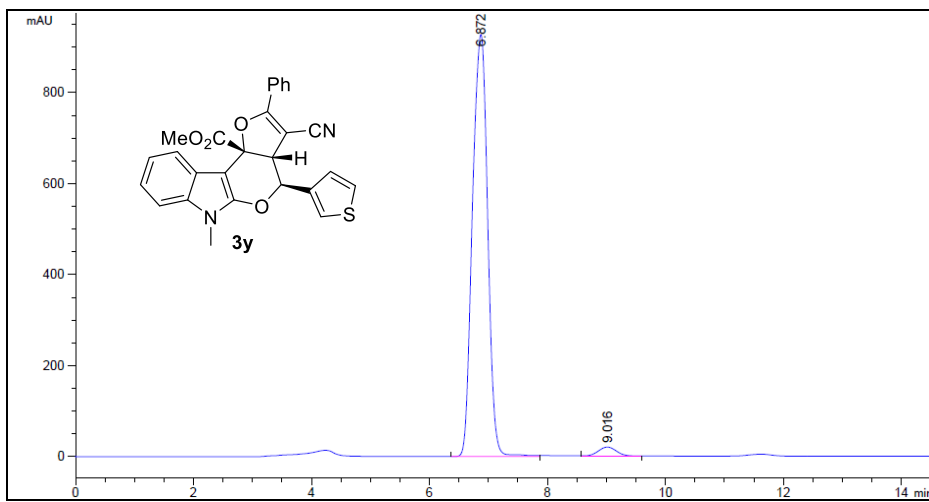

| Peak # | RetTime [min] | Type | Width [min] | Area mAU  | Area *s | Height [mAU] | Area %  |
|--------|---------------|------|-------------|-----------|---------|--------------|---------|
| 1      | 6.872         | BB   | 0.2962      | 1.65987e4 |         | 927.19025    | 97.4987 |
| 2      | 9.016         | MM   | 0.3576      | 425.83569 |         | 19.84614     | 2.5013  |

7.473  
7.453  
7.419  
7.260  
7.151  
7.131  
7.112  
7.052  
7.047  
6.979  
6.959

5.450  
5.445

3.372

1.822

0.002

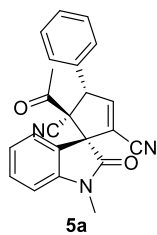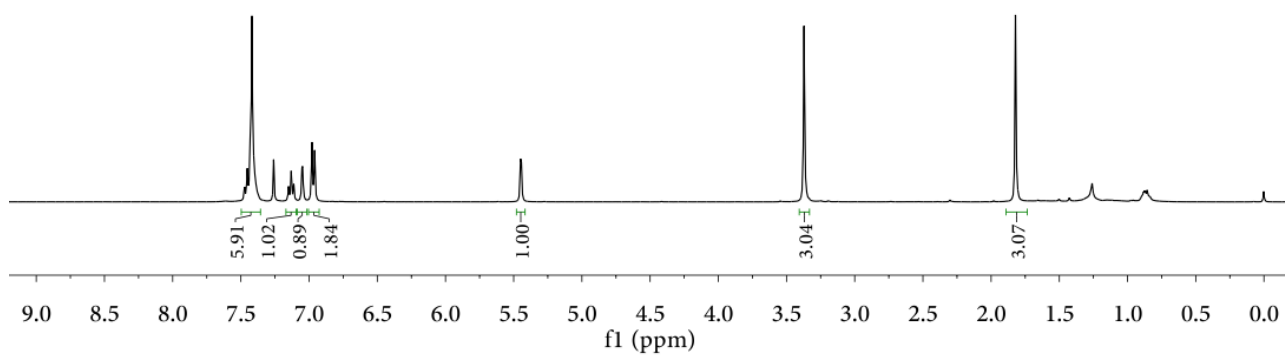

195.555

171.344

151.656

143.841

135.205

131.710

129.559

129.192

129.022

126.251

123.881

122.161

115.227

115.044

112.301

109.464

67.288

65.815

55.389

27.840

27.326

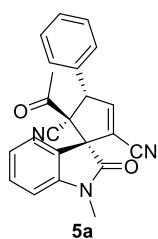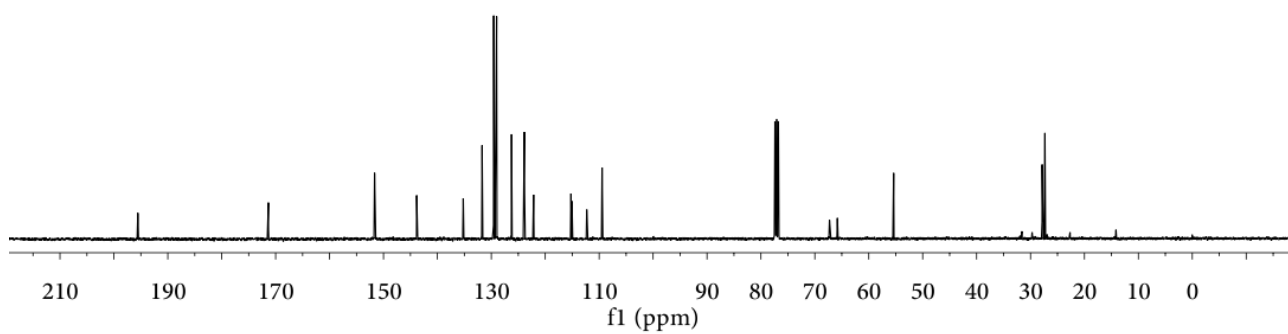

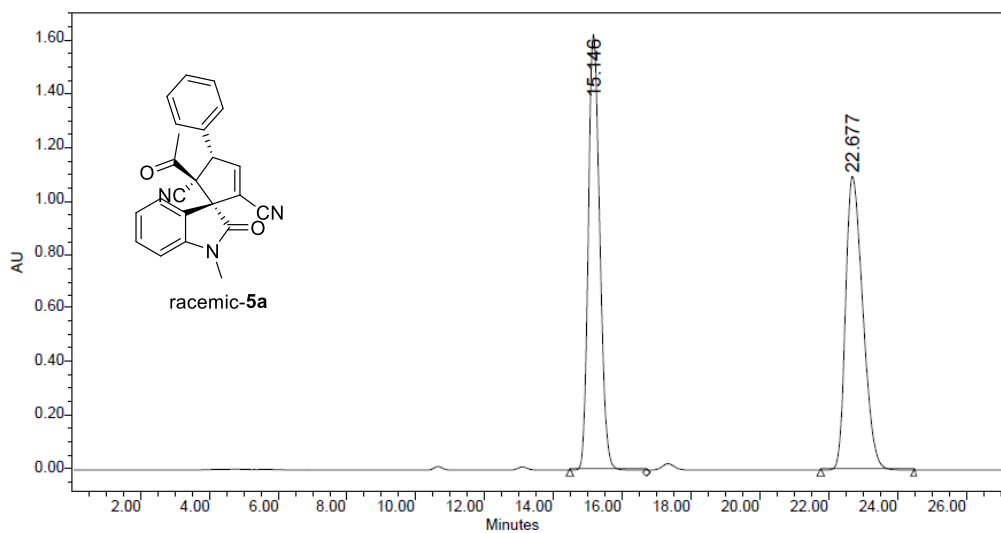

|   | RT (min) | Area (*sec) | % Area | Height ( ) | % Height |
|---|----------|-------------|--------|------------|----------|
| 1 | 15.146   | 37458791    | 49.55  | 1621248    | 59.75    |
| 2 | 22.677   | 38141543    | 50.45  | 1091978    | 40.25    |

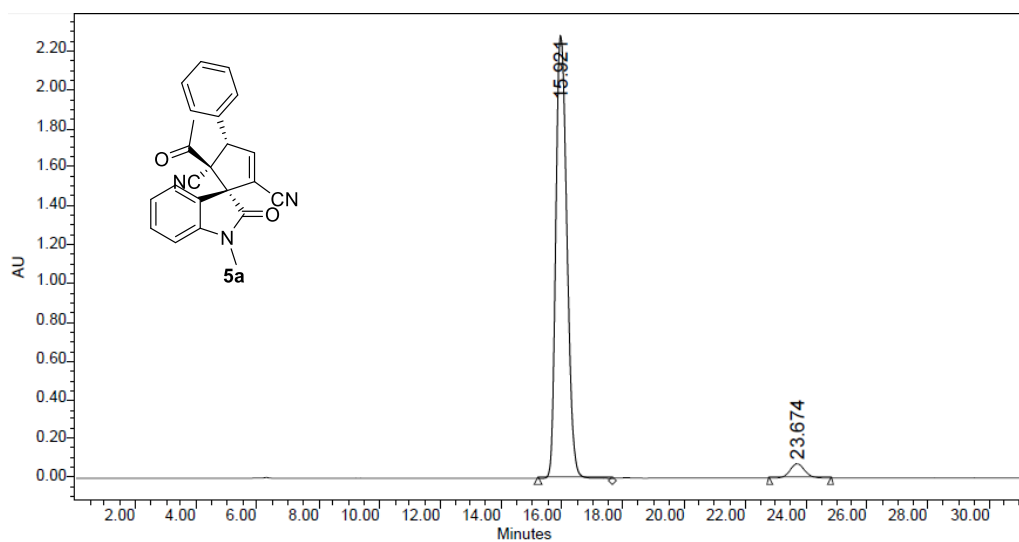

|   | RT (min) | Area (*sec) | % Area | Height ( ) | % Height |
|---|----------|-------------|--------|------------|----------|
| 1 | 15.921   | 57615314    | 95.99  | 2278908    | 96.89    |
| 2 | 23.674   | 2405715     | 4.01   | 73072      | 3.11     |

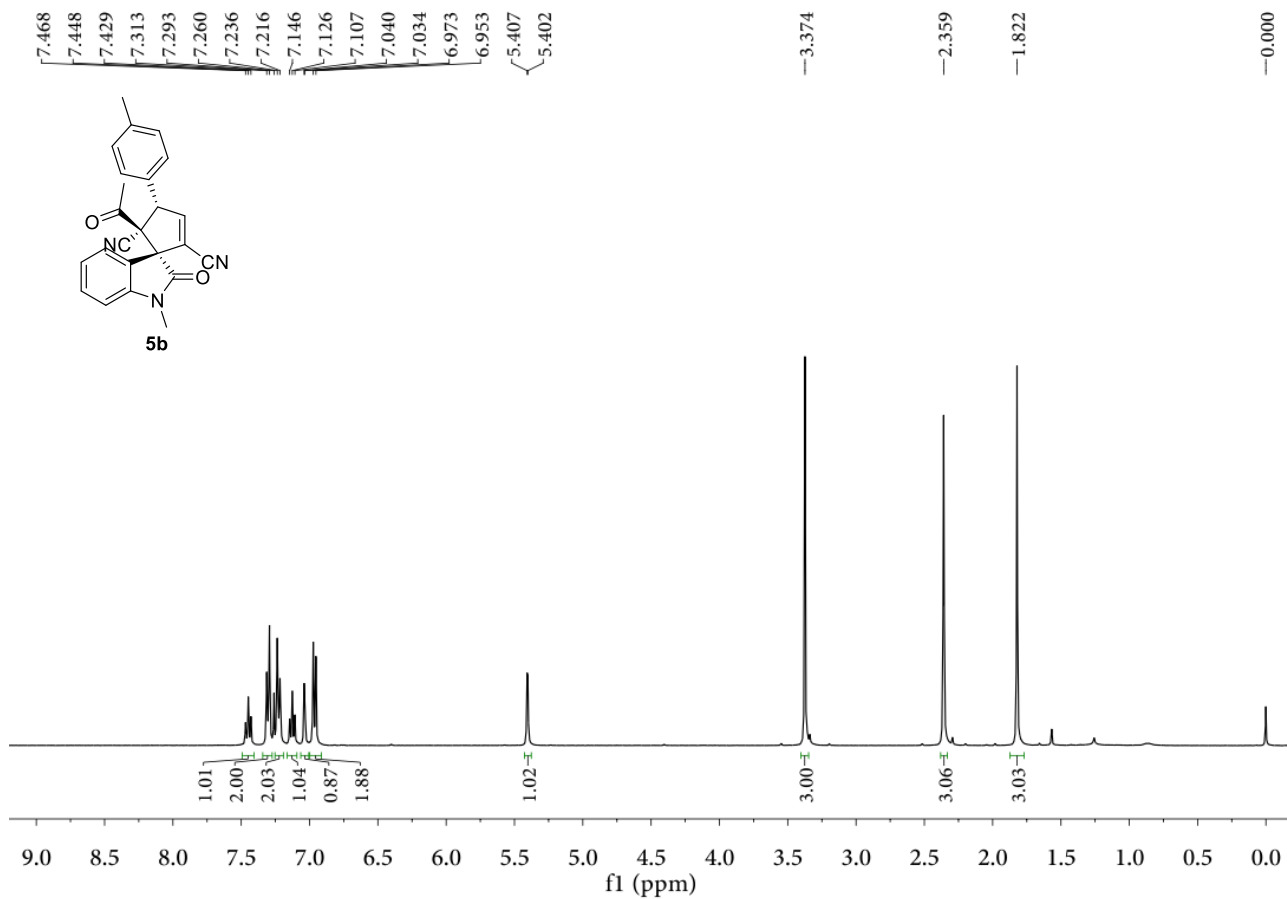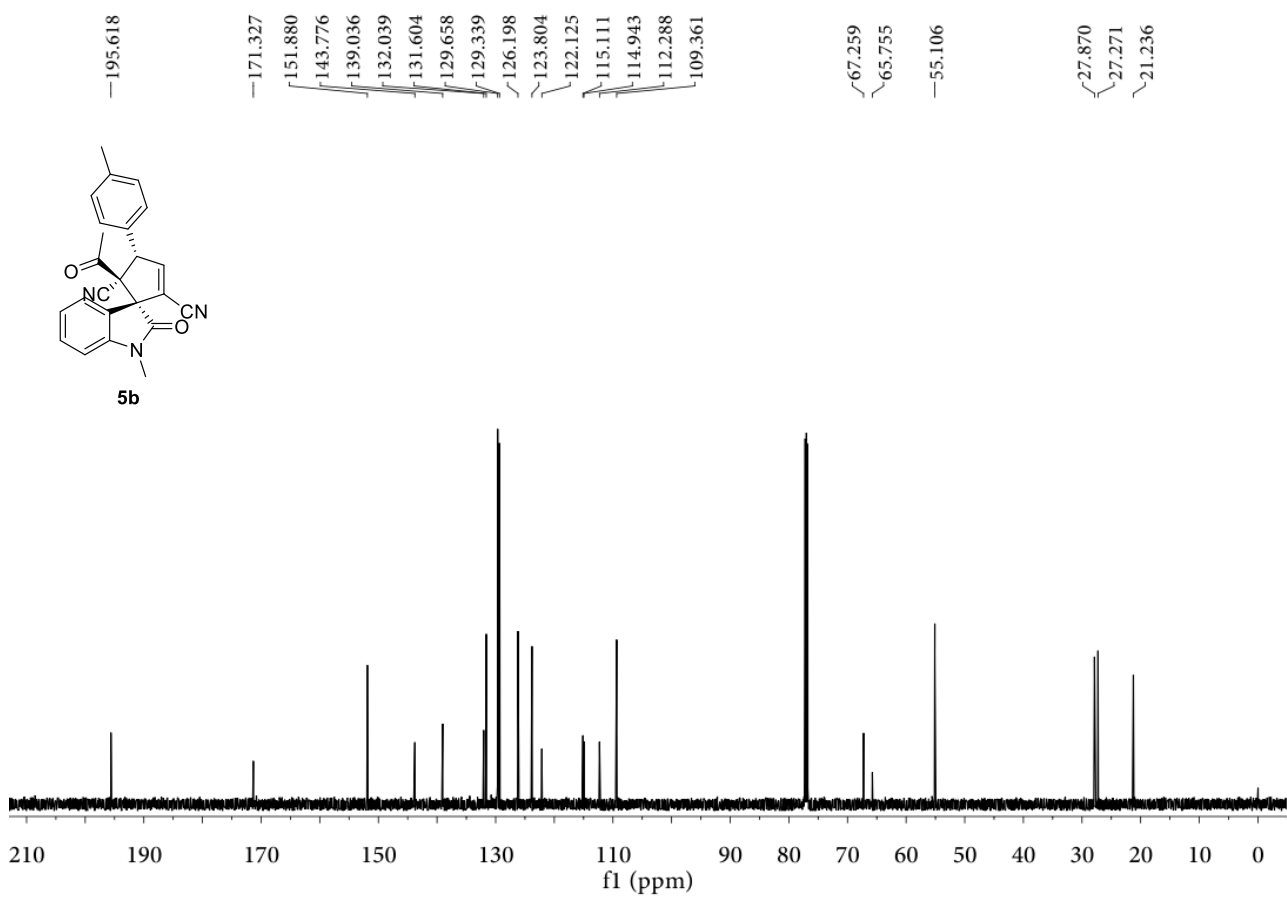

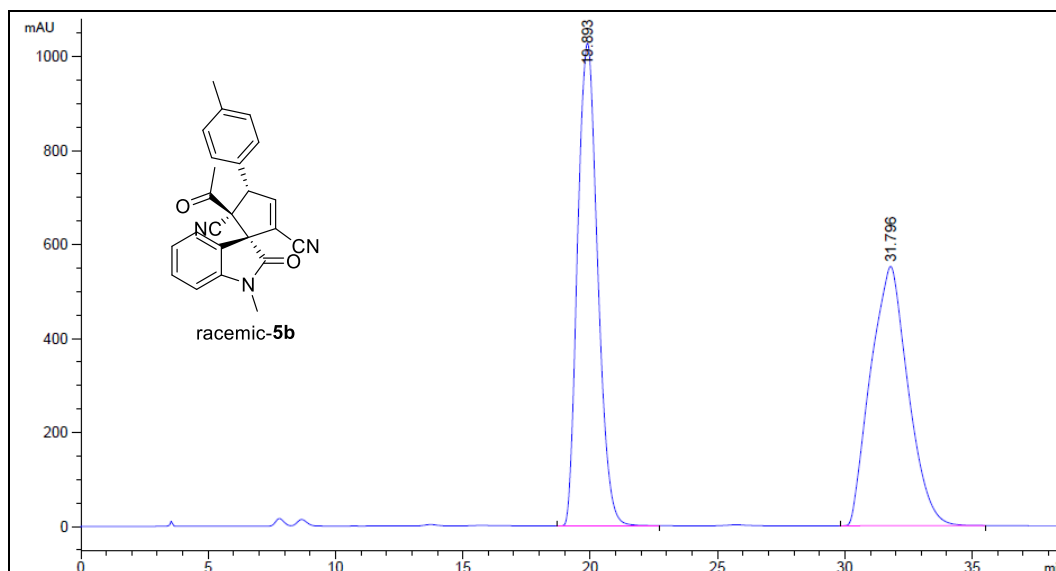

| Peak # | RetTime [min] | Type | Width [min] | Area mAU *s | Height [mAU] | Area %  |
|--------|---------------|------|-------------|-------------|--------------|---------|
| 1      | 19.893        | BB   | 0.8651      | 5.61622e4   | 1027.06824   | 49.9113 |
| 2      | 31.796        | BB   | 1.6457      | 5.63618e4   | 551.91760    | 50.0887 |

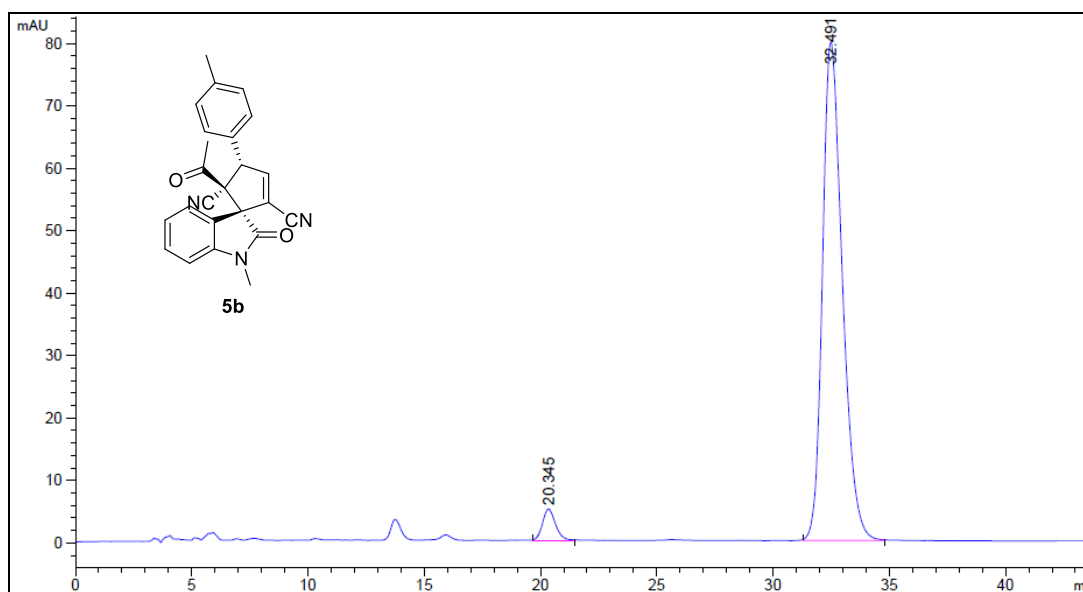

| Peak # | RetTime [min] | Type | Width [min] | Area mAU *s | Height [mAU] | Area %  |
|--------|---------------|------|-------------|-------------|--------------|---------|
| 1      | 20.345        | BB   | 0.5952      | 192.69928   | 5.00085      | 3.9105  |
| 2      | 32.491        | BB   | 0.9073      | 4735.03369  | 79.85309     | 96.0895 |

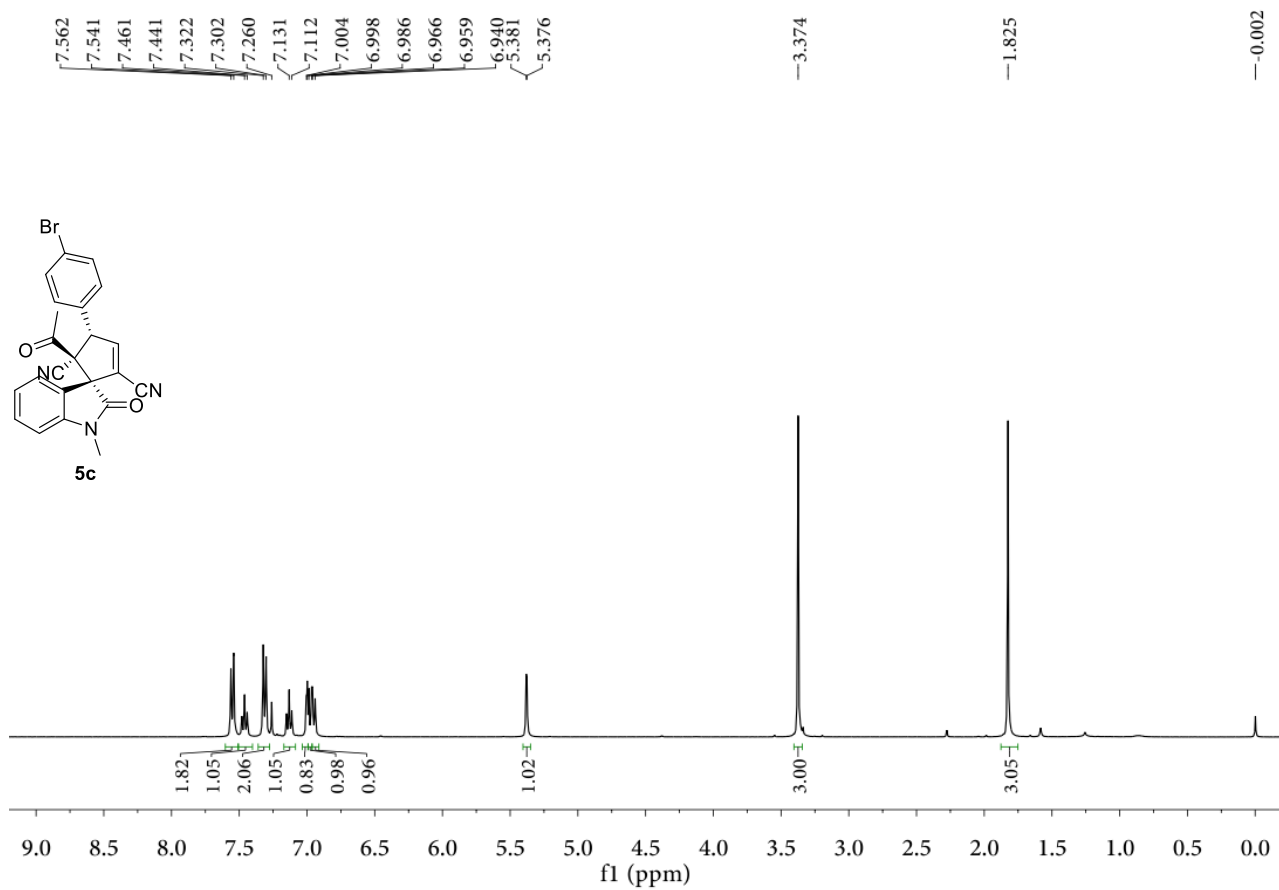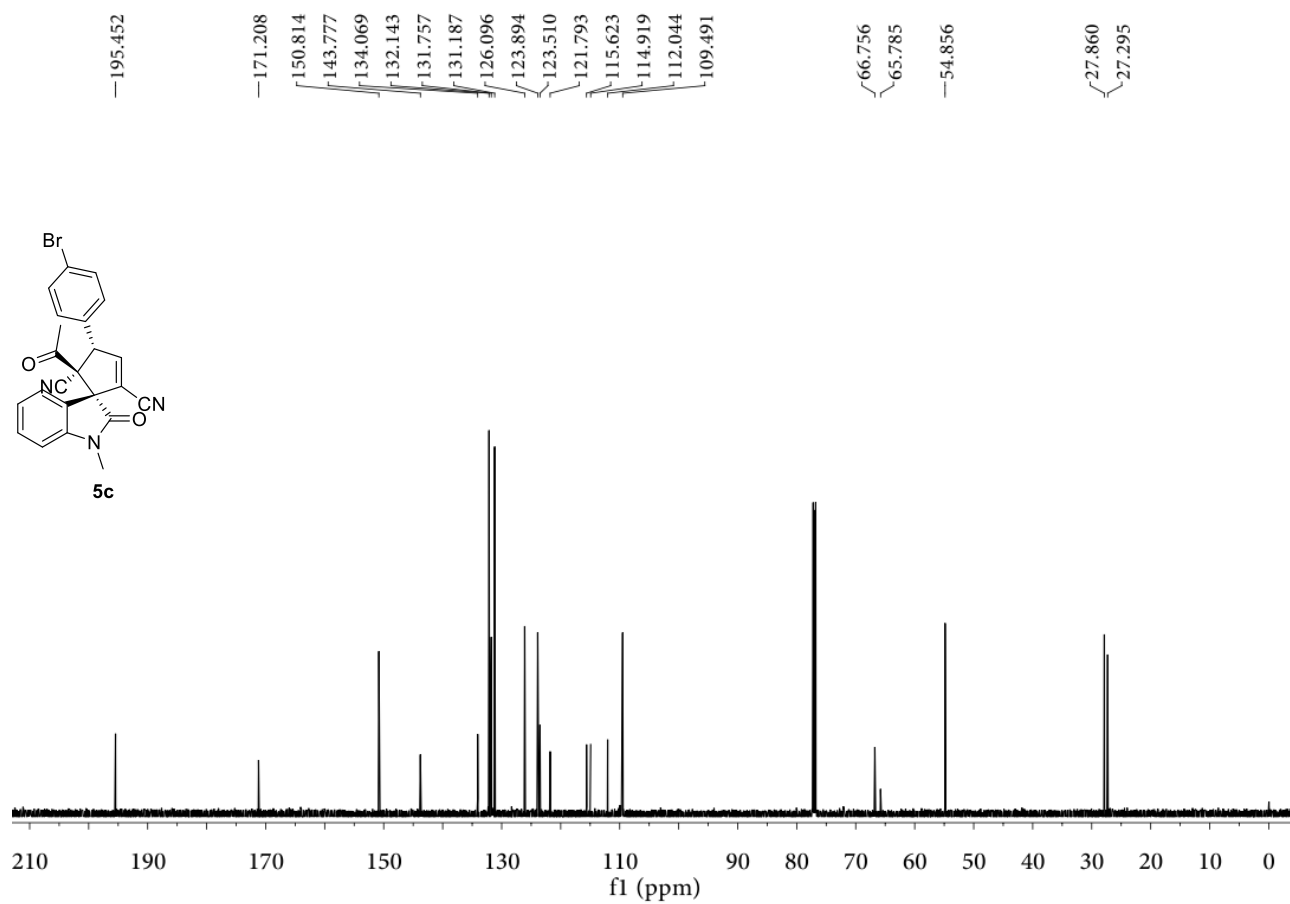

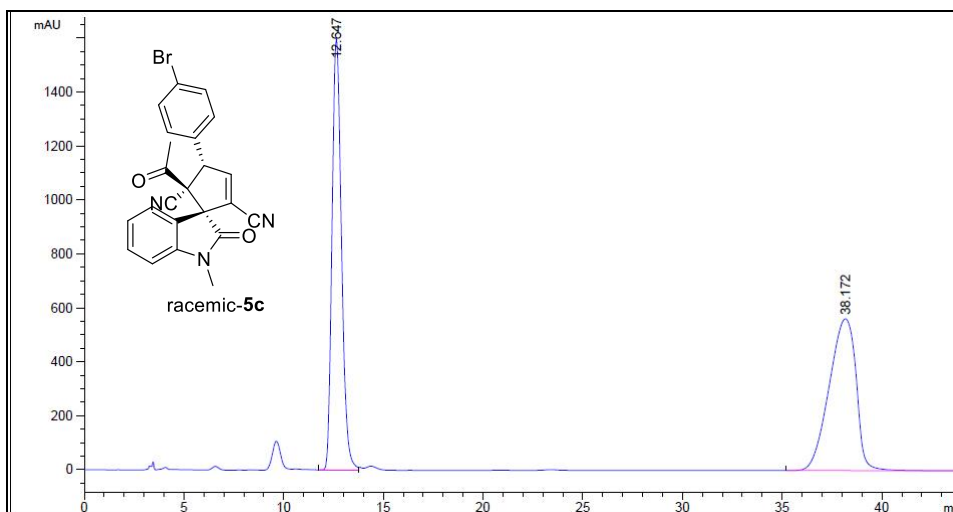

| Peak # | RetTime [min] | Type | Width [min] | Area mAU  | Area *s | Height [mAU] | Area %  |
|--------|---------------|------|-------------|-----------|---------|--------------|---------|
| 1      | 12.647        | VV   | 0.5132      | 5.27511e4 |         | 1598.29443   | 49.9267 |
| 2      | 38.172        | BBA  | 1.5105      | 5.29060e4 |         | 562.64258    | 50.0733 |

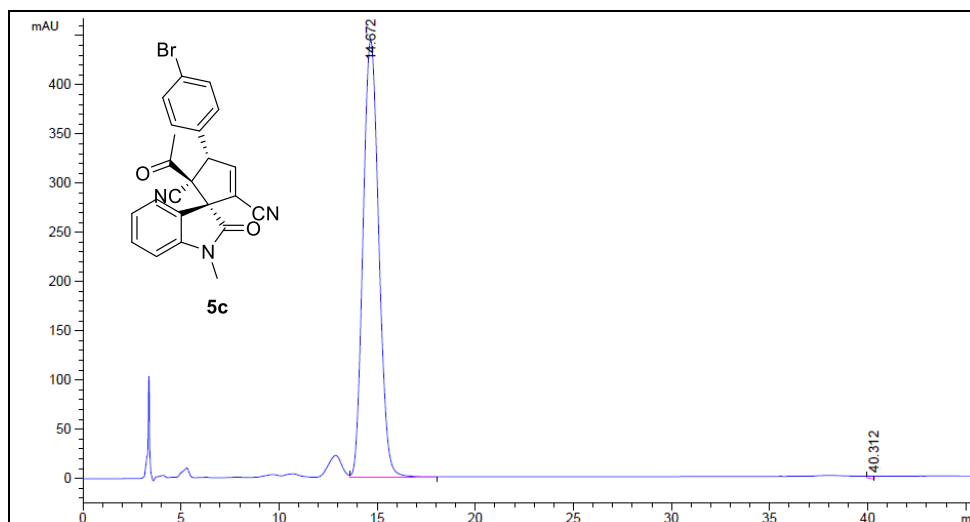

| Peak # | RetTime [min] | Type | Width [min] | Area mAU  | Area *s | Height [mAU] | Area %  |
|--------|---------------|------|-------------|-----------|---------|--------------|---------|
| 1      | 14.672        | VB   | 0.8764      | 2.46990e4 |         | 443.81152    | 99.7754 |
| 2      | 40.312        | MM   | 0.3097      | 55.60847  |         | 2.99256      | 0.2246  |



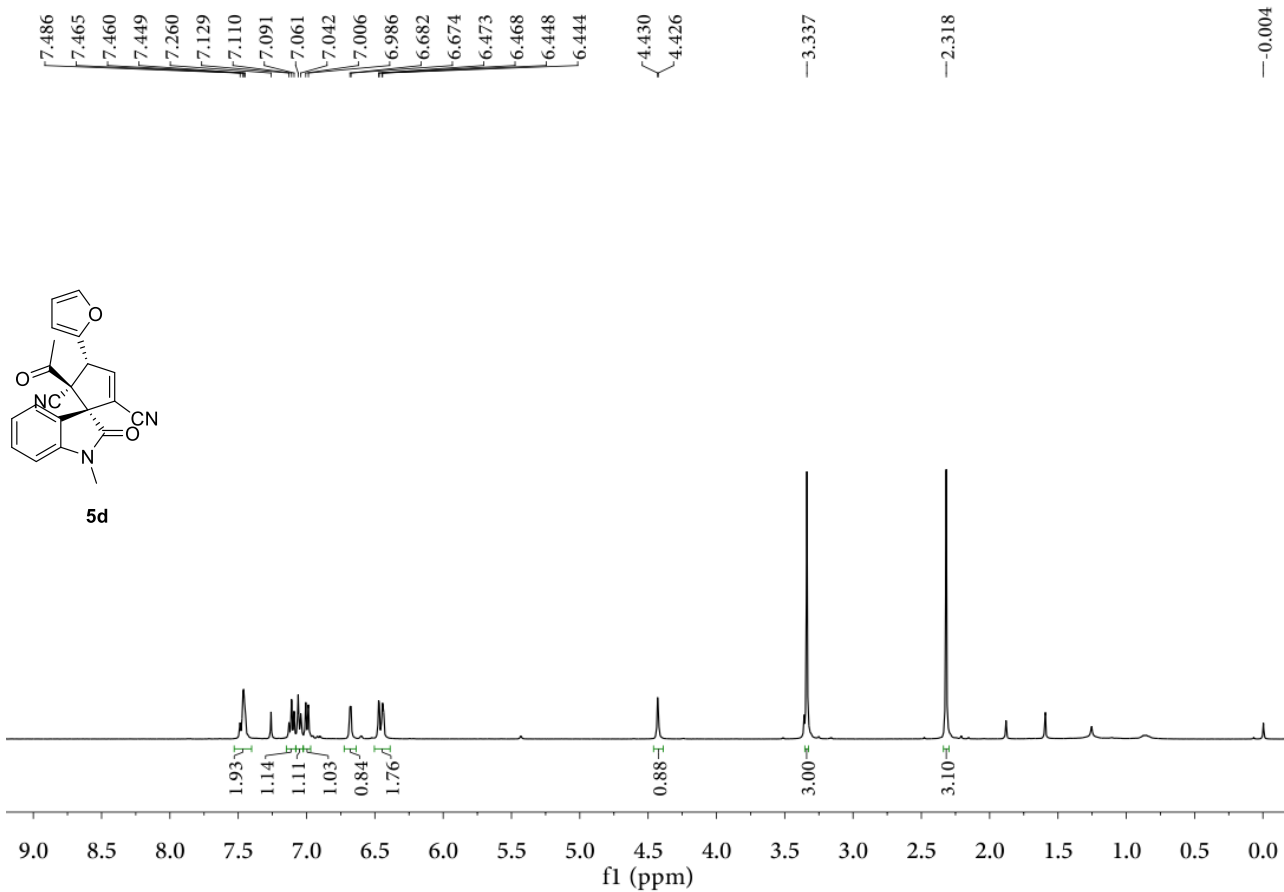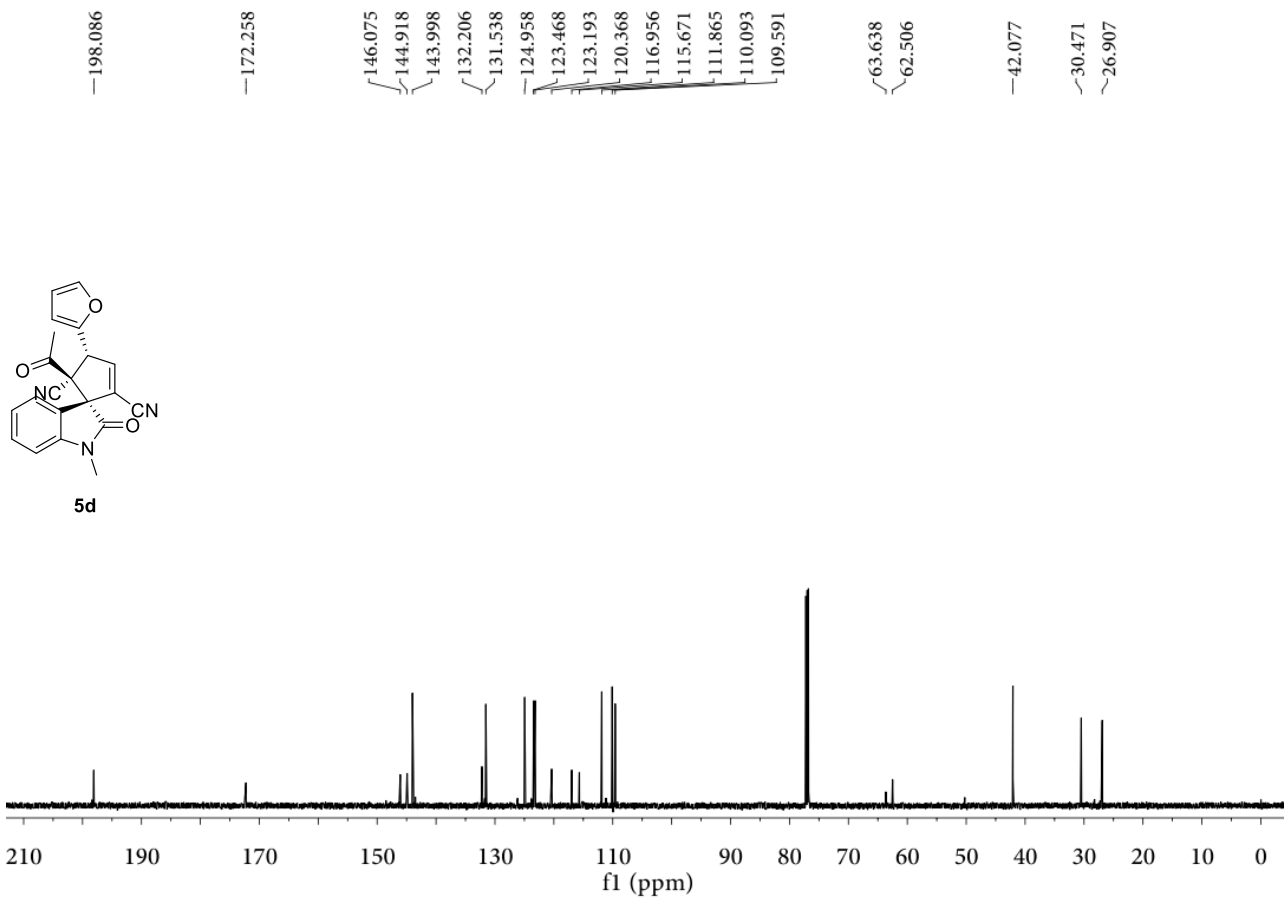

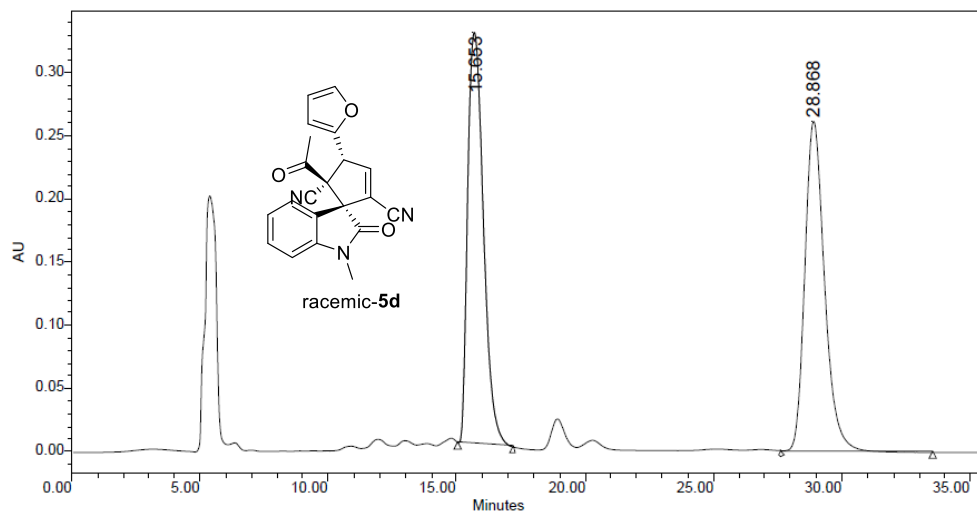

|   | RT (min) | Area (*sec) | % Area | Height ( ) | % Height |
|---|----------|-------------|--------|------------|----------|
| 1 | 15.653   | 13912146    | 49.79  | 326373     | 55.48    |
| 2 | 28.868   | 14030817    | 50.21  | 261881     | 44.52    |

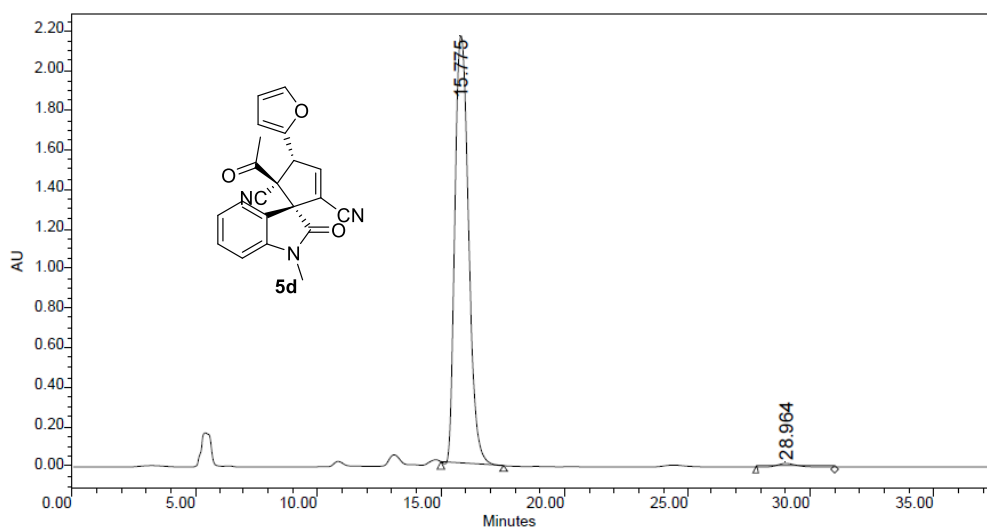

|   | RT (min) | Area (*sec) | % Area | Height ( ) | % Height |
|---|----------|-------------|--------|------------|----------|
| 1 | 15.775   | 83857976    | 98.93  | 2163493    | 99.20    |
| 2 | 28.964   | 909019      | 1.07   | 17531      | 0.80     |

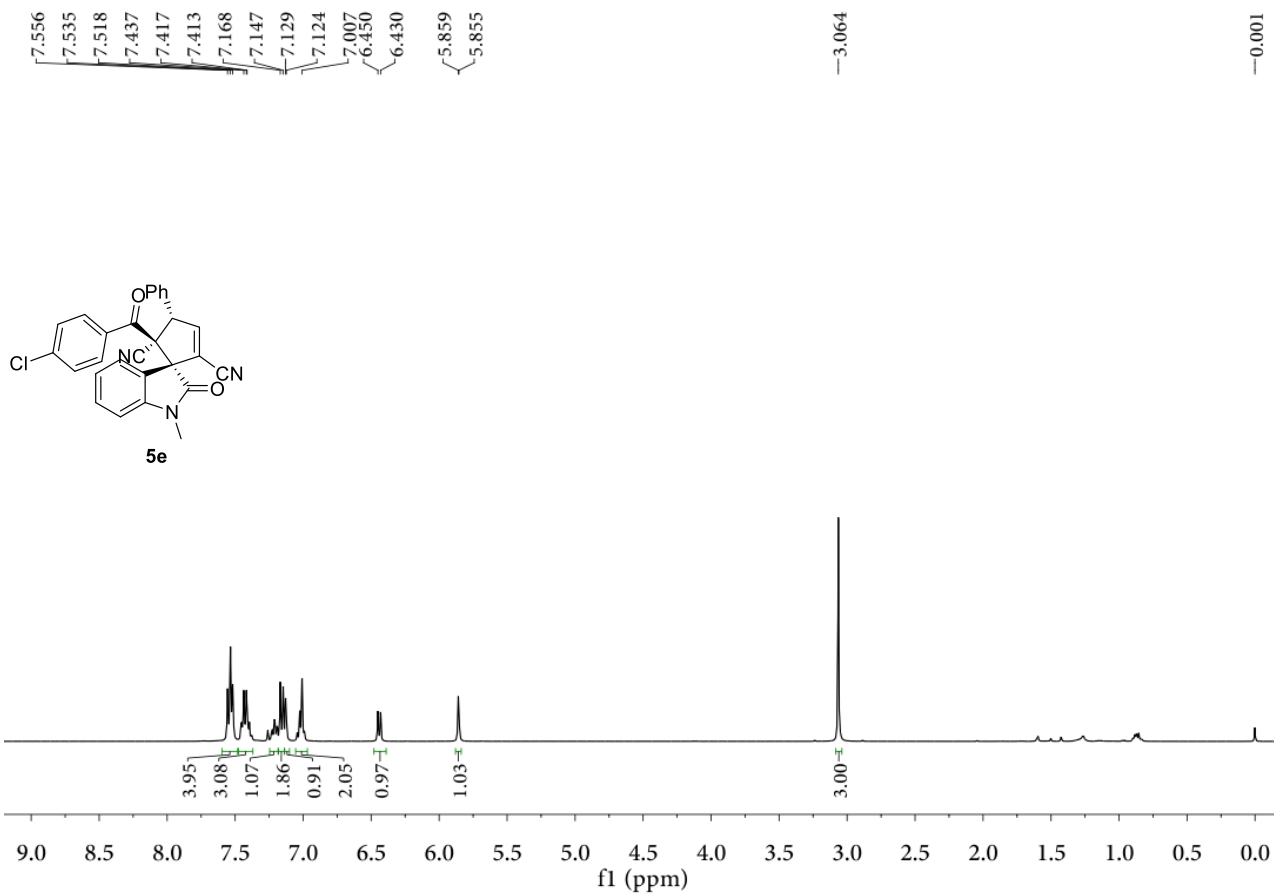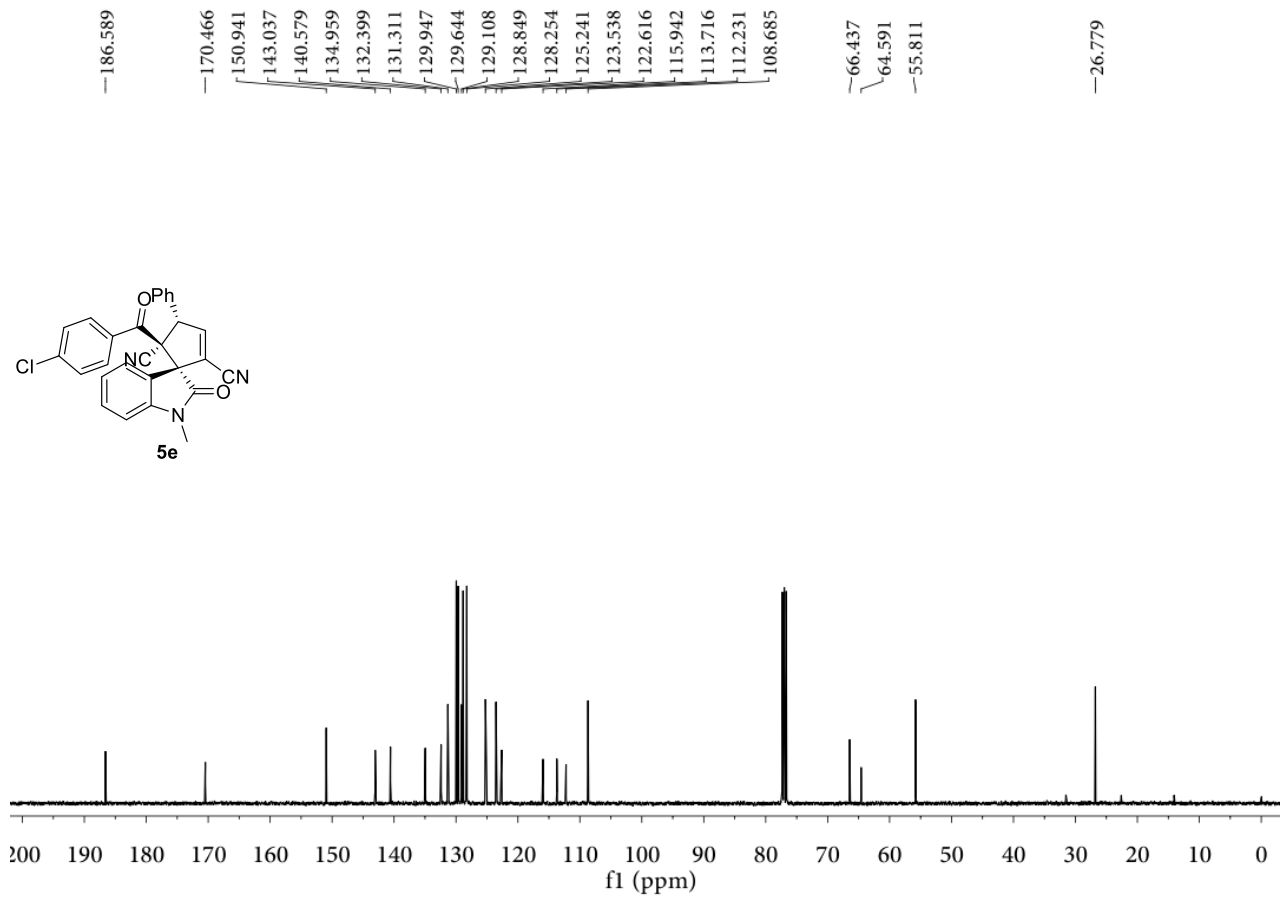

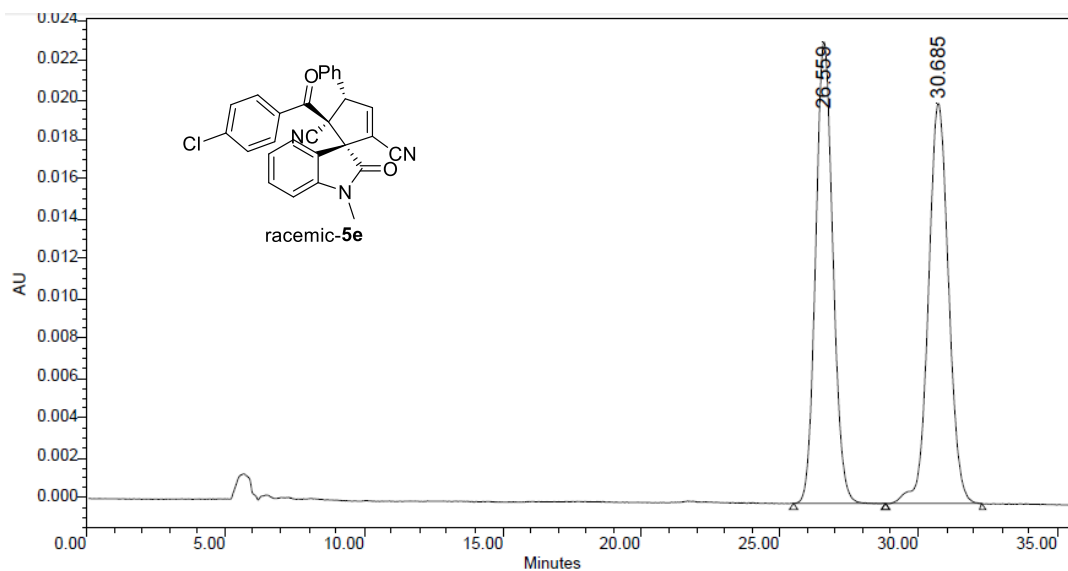

|   | RT (min) | Area (*sec) | % Area | Height ( ) | % Height |
|---|----------|-------------|--------|------------|----------|
| 1 | 26.559   | 1004595     | 49.54  | 23201      | 53.55    |
| 2 | 30.685   | 1023208     | 50.46  | 20127      | 46.45    |

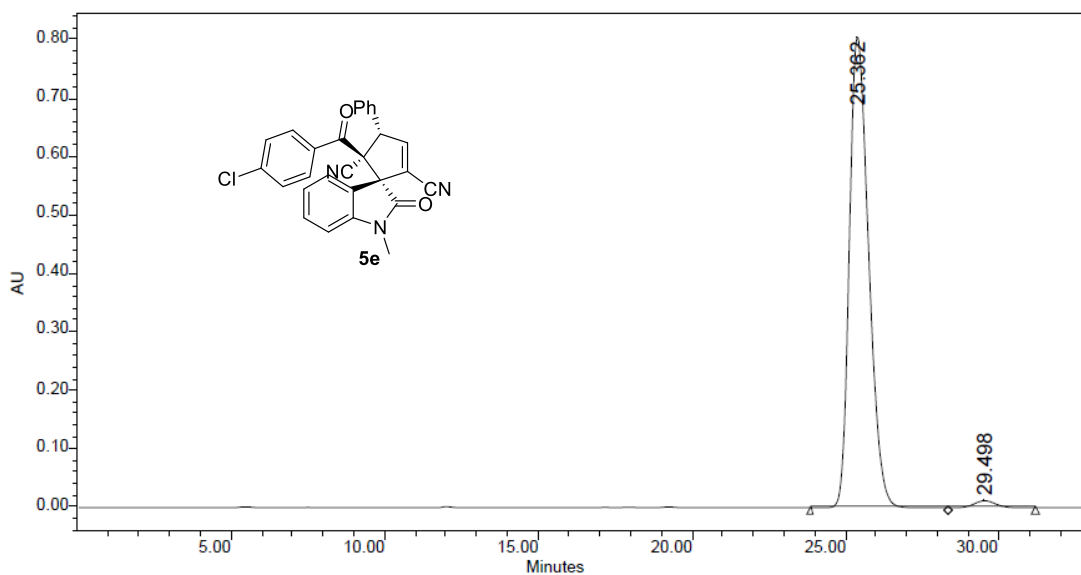

|   | RT (min) | Area (*sec) | % Area | Height ( ) | % Height |
|---|----------|-------------|--------|------------|----------|
| 1 | 25.362   | 35075499    | 98.35  | 805618     | 98.53    |
| 2 | 29.498   | 587081      | 1.65   | 12053      | 1.47     |
